# Supplementary material
Source: PubMed Central journal article supplement (PMC3205941)

# Enantioselective Total Synthesis of Aplyviolene

*Larry E. Overman\* and Martin J. Schnermann*

†Department of Chemistry, 1102 Natural Sciences II, University of California, Irvine, CA 92697-2025.

## Table of Contents

|                                                                                            |            |
|--------------------------------------------------------------------------------------------|------------|
| <b>Chemical Materials and Methods</b> .....                                                | <b>S1</b>  |
| <b>Synthetic Experimental Procedures</b> .....                                             | <b>S2</b>  |
| <b>Comparison of published and synthetic C<sup>13</sup> spectra (Table S1)</b> .....       | <b>S11</b> |
| <b>X-Ray Structure of 7</b> .....                                                          | <b>S12</b> |
| <b><sup>1</sup>H and <sup>13</sup>C NMR Spectra</b> .....                                  | <b>S13</b> |
| <b>Comparison <sup>1</sup>H-NMR of synthetic and natural aplyviolene (Figure S1)</b> ..... | <b>S39</b> |

## Chemical Materials and Methods.

Unless stated otherwise, reactions were conducted in oven-dried glassware under an atmosphere of nitrogen or argon using anhydrous solvents (either freshly distilled or passed through activated alumina columns). Titanium(IV) chloride and methylene bromide were purified by distillation. TMEDA, HMPA, and bromine were purified by distillation over CaH<sub>2</sub>. All other commercially obtained reagents were used as received. Reaction temperatures were controlled using an IKAmag temperature modulator. Thin-layer chromatography (TLC) was conducted with E. Merck silica gel 60 F254 pre-coated plates, (0.25 mm) and visualized by exposure to UV light (254 nm) or stained with anisaldehyde, ceric ammonium molybdate, potassium permanganate and iodine. Flash column chromatography was performed using normal phase silica gel (60 Å, 230-240 mesh, Merck KGA). <sup>1</sup>H NMR spectra were recorded on Bruker spectrometers (at 500 or 600 MHz) and are reported relative to deuterated solvent signals. Data for <sup>1</sup>H NMR spectra are reported as follows: chemical shift (δ ppm), multiplicity, coupling constant (Hz) and integration. <sup>13</sup>C NMR spectra were recorded on Bruker Spectrometers (at 125 or 150 MHz). Data for <sup>13</sup>C NMR spectra are reported in terms of chemical shift. IR spectra were recorded on a Varian 640-IR spectrometer and are reported in terms of frequency of absorption (cm<sup>-1</sup>). Optical rotations

were measured with a Jasco P-1010 polarimeter. High resolution mass spectra were obtained from the UC Irvine Mass Spectrometry Facility with a Micromass LCT spectrometer. See *JOC Standard Abbreviations and Acronyms* for abbreviations (available at [http://pubs.acs.org/userimages/ContentEditor/1218717864819/jocea\\_h\\_abbreviations.pdf](http://pubs.acs.org/userimages/ContentEditor/1218717864819/jocea_h_abbreviations.pdf)).

### Synthetic Experimental Procedures

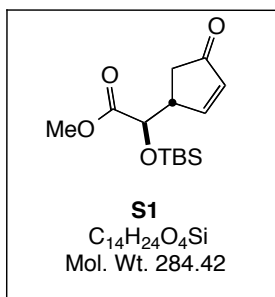

**(R)-Methyl 2-(tert-butyldimethylsilyloxy)-2-((R)-4-oxocyclopent-2-enyl)ethanoate (S1):** Alcohol **10** (1.90 g, 11.2 mmol)<sup>1</sup> was dissolved in CH<sub>2</sub>Cl<sub>2</sub> (32 mL) at 0 °C. DMAP (4.09 g, 33.5 mmol) and TBSCl (5.03 g, 33.5 mmol) were added, the solution was allowed to warm rt. After 1h, the solution was added to 100 mL of saturated NH<sub>4</sub>Cl (100 mL) and CH<sub>2</sub>Cl<sub>2</sub> (50 mL) and the layers were separated. The aqueous layer was washed with additional CH<sub>2</sub>Cl<sub>2</sub> (2 × 50 mL). The organic phases were combined, dried over Na<sub>2</sub>SO<sub>4</sub>, filtered, and concentrated. Purification of the residue by silica gel chromatography (5→15% EtOAc/hexanes) gave **S1** (2.63 g, 83%) as a clear oil: R<sub>f</sub>: 0.56 (2:1 hexane:EtOAc); <sup>1</sup>H NMR (CDCl<sub>3</sub>, 500 MHz) δ 7.57 (dd, *J* = 5.7, 2.5 Hz, 1H), 6.22 (dd, *J* = 5.7, 1.9 Hz, 1H), 4.18 (d, *J* = 5.9 Hz, 1H), 3.74 (s, 3H), 3.34 (m, 1H), 2.44 (dd, *J* = 19, 6.8 Hz, 1H), 2.22 (dd, *J* = 19, 2.4 Hz, 1H), 0.85 (s, 9H), 0.03 (s, 3H), 0.02 (s, 3H); <sup>13</sup>C NMR (CDCl<sub>3</sub>, 125 MHz) δ 208.6, 172.6, 163.6, 135.9, 73.7, 52.3, 45.6, 37.4, 25.8, 25.6, 18.4, -4.8, -5.3; IR (thin film) 2954, 1754, 1717, 1254 cm<sup>-1</sup>; HRMS (ESI) calculated for C<sub>14</sub>H<sub>24</sub>O<sub>4</sub>SiNa (M+Na): 307.1342, observed: 307.1341; [α]<sub>D</sub><sup>25</sup>+167, [α]<sub>577</sub><sup>25</sup>+175, [α]<sub>546</sub><sup>25</sup>+199, [α]<sub>435</sub><sup>25</sup>+347, [α]<sub>405</sub><sup>25</sup>+416, (*c* = 1.0, CHCl<sub>3</sub>).

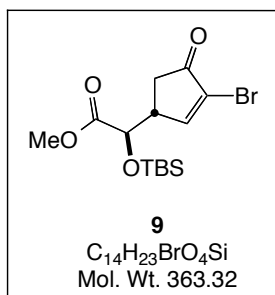

**(R)-Methyl 2-((R)-3-bromo-4-oxocyclopent-2-enyl)-2-(tert-butyldimethylsilyloxy)ethanoate (9):** Freshly distilled bromine (200 μL, 3.8 mmol) in CH<sub>2</sub>Cl<sub>2</sub> (5 mL) was added slowly over 10 min to a solution of enone **SI** (1.00 g, 3.47 mmol) in CH<sub>2</sub>Cl<sub>2</sub> (40 mL) at 0 °C. After 5 minutes the reaction was complete by TLC and was concentrated. Purification of the resulting oil by silica gel chromatography gave **21** (1.05 g, 84%) as a colorless oil: R<sub>f</sub> 0.26 (15% EtOAc)/hexanes); <sup>1</sup>H NMR (CDCl<sub>3</sub>, 500 MHz) δ 7.63 (d, *J* = 2.8 Hz, 1H), 4.20 (d, *J* = 5.4 Hz, 1H), 3.75 (s, 3H), 3.30 (m, 1H), 2.62 (dd, *J* = 19, 6.7 Hz, 1H), 2.37 (dd, *J* = 19, 2.1 Hz, 1H), 0.84 (s, 9H), 0.04 (s, 3H),

<sup>1</sup> (a) Schnermann, M. J.; Beaudry, C. M.; Egovora, A. V.; Polishchuk, R. S.; Sütterlin, C.; Overman, L. E. *Proc. Nat. Acad. Sci. USA* **2010**, *107*, 6158. (b) submitted for publication

0.02 (s, 3H);  $^{13}\text{C}$  NMR ( $\text{CDCl}_3$ , 125 MHz)  $\delta$  200.1, 172.1, 160.6, 127.4, 77.3, 52.4, 44.7, 36.0, 25.7, 18.3, -4.8, -5.4; IR 1754, 1727  $\text{cm}^{-1}$ ; HRMS (ESI) calculated for  $\text{C}_{14}\text{H}_{23}\text{O}_4\text{SiBrNa}$  ( $\text{M}+\text{Na}$ ): 385.0447, observed: 385.0449;  $[\alpha]_D^{25} +99$ ,  $[\alpha]_{577}^{25} +105$ ,  $[\alpha]_{546}^{25} +118$ ,  $[\alpha]_{435}^{25} +209$ ,  $[\alpha]_{405}^{25} +255$ , ( $c = 1.0$ ,  $\text{CHCl}_3$ ).

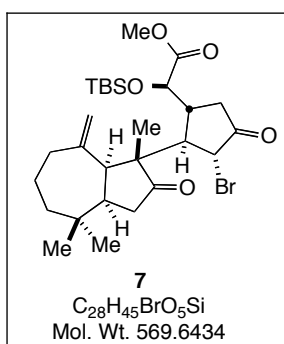

**Bromide 7:** Both **8** and **9** were dried azeotropically by dissolving in benzene (3mL) and concentrating. To a solution of **8** (200 mg, 0.97 mmol)<sup>2</sup> in THF (2 mL) and HMPA (2 mL) at rt was added dropwise a freshly prepared solution 0.6 M LDA in THF (1.3 mL, 0.78 mmol). The bright yellow solution was maintained at rt for 4 h and then cooled to  $-78^\circ\text{C}$ . Syringe pump addition of **9** (220 mg, 0.60 mmol) in THF (2 mL) over 25 min formed a red solution. After 30 min at  $-78^\circ\text{C}$ , the solution was added to saturated  $\text{NH}_4\text{Cl}$  (100 mL) and  $\text{Et}_2\text{O}$  (50

mL) and the layers were separated. The aqueous layer was washed with additional  $\text{Et}_2\text{O}$  ( $2 \times 50$  mL). The organic phases were combined, dried over  $\text{Na}_2\text{SO}_4$ , filtered, and concentrated. Purification of the residue by pH 7 buffered silica gel chromatography<sup>3</sup> (1 $\rightarrow$ 2% EtOAc/hexanes) gave **7** (275 mg, 81%) as a white solid: m.p. 135–136  $^\circ\text{C}$ ;  $R_f$ : 0.50 (20% EtOAc/hexanes);  $^1\text{H}$  NMR ( $\text{C}_6\text{D}_6$ , 500 MHz)  $\delta$  4.67 (m, 2H), 4.52 (s, 1H), 4.04 (d,  $J = 4.9$  Hz, 1H), 3.35 (s, 3h), 3.09 (d,  $J = 4.9$  Hz, 1H), 2.64 (m, 3H), 2.30 (m, 2H), 2.00 (m, 2H), 1.88 (d,  $J = 17.9$  Hz, 1H), 1.47 (m, 1H), 1.25 (m, 2H), 1.11 (m, 2H), 1.10 (s, 3H), 1.00 (s, 9H), 0.69 (s, 3H), 0.58 (s, 3H), 0.15 (s, 3H), 0.10 (s, 3H);  $^{13}\text{C}$  NMR ( $\text{C}_6\text{D}_6$ , 125 Mhz)  $\delta$  218.5, 205.7, 172.7, 152.6, 114.2, 76.8, 56.4, 54.9, 51.6, 49.7, 47.8, 43.1, 41.2, 40.9, 38.3, 36.6, 36.5, 34.7, 34.0, 29.0, 26.2, 25.2, 18.9, 14.5, -4.7, -5.0; IR (thin film) 2931, 1759, 1730, 1257, 1141  $\text{cm}^{-1}$ ; HRMS (ESI/TOF) calculated for  $\text{C}_{28}\text{H}_{45}\text{O}_5\text{SiBrNa}$  ( $\text{M}+\text{Na}$ )<sup>+</sup> 591.2117, observed 591.2107;  $[\alpha]_D^{25} +56.5$ ,  $[\alpha]_{577}^{25} +58.6$ ,  $[\alpha]_{546}^{25} +64.9$ ,  $[\alpha]_{435}^{25} +114.7^\circ$ ,  $[\alpha]_{405}^{25} +133.7^\circ$ , ( $c = 1$ ,  $\text{CH}_2\text{Cl}_2$ ); X-ray quality crystals were obtained via vapour diffusion by dissolving **7** in EtOAc and exposing to hexanes vapour.

<sup>2</sup> Lebsack, A. D.; Overman, L. E.; Valentekovich, R. J. *J. Am. Chem. Soc.* **2001**, *123*, 4851.

<sup>3</sup> Deactivated silica gel can be prepared by adding 10% (by weight) pH 7, 0.2 M phosphate buffer to silica gel and mixing until homogenous. A convenient method for mixing is to let the mixture tumble on a spinning rotovap, without applying a vacuum. This procedure has been used to facilitate the purification of guanidine containing compounds, see: Coffey, D. S.; Overman, L. E.; Stappenbeck, F. *J. Am. Chem. Soc.* **2000**, *122*, 4904. In this case, its use avoided the formation of the  $\alpha$ -hydroxy ketone byproduct.

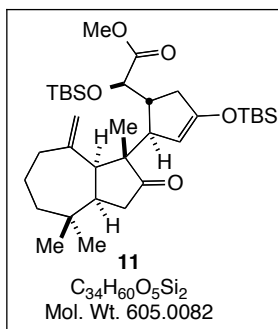

**Enol Silane 11:** A 0.5 M solution of Me<sub>2</sub>CuCNLi in Et<sub>2</sub>O (~10 mL) was prepared by addition of 1.5 M MeLi in Et<sub>2</sub>O (2.7 mL, 4.0 mmol) to a stirred mixture of CuCN (180 mg, 2.0 mmol) in Et<sub>2</sub>O (7.5 mL) at 0 °C to form a clear homogenous solution. To a flask at -78 °C containing TBSCl (1.0 g, 6.8 mmol) was added THF (4.5 mL), HMPA (1 mL), and 0.2 M Me<sub>2</sub>CuCNLi in Et<sub>2</sub>O (4.6 mL, 0.92 mmol) to form a clear homogenous solution. A solution of **7** (260 mg, 0.46 mmol) in THF (4.5 mL) was added by syringe pump over 30 min to generate a persistent yellow solution. After 10 min, the solution was added to 10:1 saturated NH<sub>4</sub>Cl/NH<sub>4</sub>OH (100 mL) and Et<sub>2</sub>O (100 mL) and the layers were separated. The aqueous layer was washed with additional Et<sub>2</sub>O (2 × 50 mL). The organic phases were combined, dried over Na<sub>2</sub>SO<sub>4</sub>, filtered, and concentrated. Purification of the residue by silica gel chromatography (1→5% EtOAc/hexanes) gave **11** (240 mg, 86%) as a clear oil: R<sub>f</sub>: 0.44 (5% EtOAc/hexanes); <sup>1</sup>H NMR (C<sub>6</sub>D<sub>6</sub>, 500 MHz) δ 4.73 (m, 2H), 4.68 (s, 1H), 4.28 (d, *J* = 4.1 Hz, 1H), 3.50 (s, 3H), 3.25 (bs, 1H), 2.88 (d, *J* = 8.2 Hz, 1H), 2.67 (m, 1H), 2.58 (m, 2H), 2.32 (d, *J* = 16.4 Hz, 1H), 2.20 (d, *J* = 11.6 Hz, 1H), 2.01 (dd, *J* = 12.8, 5.7 Hz, 1H), 1.49 (m, 1H), 1.33 (m, 4H), 1.22 (m, 1H), 1.20 (s, 3H), 1.00 (s, 9H), 0.99 (s, 9H), 0.96 (s, 3H), 0.79 (s, 3H), 0.32 (s, 3H), 0.24 (s, 3H), 0.14 (s, 3H), 0.04 (s, 3H); <sup>13</sup>C NMR (C<sub>6</sub>D<sub>6</sub>, 125 Mhz) δ 219.2, 173.0, 155.3, 153.5, 113.7, 102.2, 77.0, 58.8, 55.0, 51.4, 48.9, 44.2, 42.0, 38.45, 38.4, 36.8, 36.6, 35.0 34.4, 29.1, 26.1, 25.9, 25.4, 18.7, 18.2, 15.0, -4.3, -4.5, -4.7, -5.1; IR (thin film) 2929, 2857, 1755, 1730, 1253, 839 cm<sup>-1</sup>; HRMS (ESI/TOF) calculated for C<sub>34</sub>H<sub>60</sub>O<sub>5</sub>Si<sub>2</sub>Na (M+Na)<sup>+</sup> 627.3877, observed 627.3862; [α]<sub>D</sub><sup>25</sup> +6.0, [α]<sub>577</sub><sup>25</sup> +5.4, [α]<sub>546</sub><sup>25</sup> +6.9, [α]<sub>435</sub><sup>25</sup> +6.7, [α]<sub>405</sub><sup>25</sup> +20.1, (*c* = 0.33, CH<sub>2</sub>Cl<sub>2</sub>).

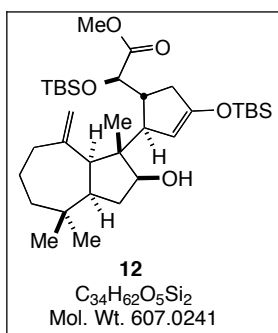

**Alcohol 12:** To a stirred solution of **11** (240 mg, 0.39 mmol) in EtOH (4 mL) at 0°C was added CeCl<sub>3</sub>·7H<sub>2</sub>O (29 mg, 0.078 mmol) and NaBH<sub>4</sub> (120 mg, 3.1 mmol). After 2h at 0 °C, saturated aqueous NH<sub>4</sub>Cl (10 mL) and CH<sub>2</sub>Cl<sub>2</sub> (5 mL). The biphasic mixture was stirred vigorously for 4 h and the layers were separated. The aqueous layer was washed with additional CH<sub>2</sub>Cl<sub>2</sub> (2 × 10 mL). The organic phases were combined, dried over Na<sub>2</sub>SO<sub>4</sub>, filtered, and concentrated. Purification of the residue by silica gel chromatography (1→5% EtOAc/hexanes) gave **12** (167 mg, 71%) as a clear oil: R<sub>f</sub>: 0.38 (20% EtOAc/hexanes); <sup>1</sup>H NMR (C<sub>6</sub>D<sub>6</sub>, 500 MHz) δ 5.09 (s, 1H), 4.94 (d, *J* = 2.4 Hz, 1H), 4.85 (s, 1H), 4.19 (d, *J* = 7.8 Hz, 1H),

3.82 (m, 1H), 3.37 (s, 3H), 2.95 (m, 2H), 2.87 (m, 1H), 2.66 (m, 1H), 2.29 (m, 2H), 1.87 (apt t,  $J = 12.7$  Hz, 1H), 1.75 (m, 2H), 1.64 (m, 1H), 1.52 (m, 3H), 1.19 (m, 1H), 1.11 (s, 3H), 1.04 (s, 9H), 1.01 (s, 9H), 0.98 (s, 3H), 0.95 (s, 3H), 0.23 (s, 6H), 0.13 (s, 3H), 0.10 (s, 3H);  $^{13}\text{C}$  NMR ( $\text{C}_6\text{D}_6$ , 125 Mhz)  $\delta$  173.3, 155.9, 154.9, 115.2, 103.4, 78.5, 76.8, 56.7, 55.8, 51.5, 51.2, 48.2, 40.5, 38.5, 37.5, 37.1, 36.9, 36.1, 34.9, 29.2, 26.1, 25.9, 18.6, 18.3, 14.4, -4.2, -4.4, -4.8, -4.9; IR (thin film) 2952, 2858, 1651, 1252, 839  $\text{cm}^{-1}$ ; HRMS (ESI/TOF) calculated for  $\text{C}_{34}\text{H}_{62}\text{O}_5\text{Si}_2\text{Na}$  ( $\text{M}+\text{Na}$ ) $^+$  629.4034, observed 629.4038;  $[\alpha]_D^{25} +57.2$ ,  $[\alpha]_{577}^{25} +59.4$ ,  $[\alpha]_{546}^{25} +65.6$ ,  $[\alpha]_{435}^{25} +118.5$ ,  $[\alpha]_{405}^{25} +141.9$ , ( $c = 0.5$ ,  $\text{CH}_2\text{Cl}_2$ ).

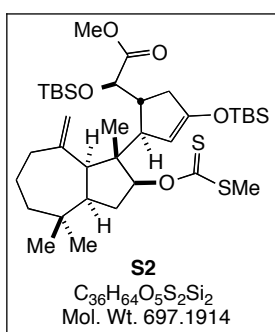

**Xanthate ester S2:** To a solution of **12** (210 mg, 0.34 mmol) in THF (3.4 mL) at  $-78$  °C was added  $\text{CS}_2$  (0.13 mL, 1.7 mmol) and 1 M NaHMDS in THF (1.1 mL, 1.1 mmol). After 5 min, MeI (0.10 mL, 1.7 mmol) was added. The solution was maintained at  $-78$  °C for 10 min and then added to saturated aqueous ammonium chloride (30 mL) and  $\text{Et}_2\text{O}$  (20 mL) and the layers were separated. The aqueous layer was washed with additional  $\text{Et}_2\text{O}$  ( $2 \times 10$  mL). The organic phases were

combined, dried over  $\text{Na}_2\text{SO}_4$ , filtered, and concentrated. Purification of the residue by silica gel chromatography (0 $\rightarrow$ 4%  $\text{EtOAc}$ /hexanes) gave **S2** (220 mg, 93%) as a clear oil:  $R_f$ : 0.51 (5%  $\text{EtOAc}$ /hexanes);  $^1\text{H}$  NMR ( $\text{C}_6\text{D}_6$ , 500 MHz)  $\delta$  6.09 (dd,  $J = 9.4, 6.6$  Hz, 1H), 5.01 (s, 1H), 4.95 (s, 1H), 4.93 (s, 1H), 4.23 (d,  $J = 6.5$  Hz, 1H), 3.36 (s, 3H), 3.09 (bs, 1H), 2.97 (d, 1H), 2.71 (m, 2H), 2.41 (m, 1H), 2.31 (d,  $J = 11.2$  Hz, 1H), 2.27 (dd,  $J = 12.0, 4.8$  Hz, 1H), 2.21 (s, 3H), 1.98 (m, 1H), 1.86 (m, 1H), 1.75 (m, 1H), 1.62 (m, 1H), 1.39 (m, 2H), 1.13 (s, 3H), 1.10 (m, 1H), 1.08 (s, 3H), 0.98 (s, 9H), 0.97 (s, 9H), 0.87 (s, 3H), 0.26 (s, 3H), 0.25 (s, 3H), 0.12 (s, 3H), 0.08 (s, 3H);  $^{13}\text{C}$  NMR ( $\text{C}_6\text{D}_6$ , 125 Mhz)  $\delta$  215.9, 173.0, 156.9, 154.0, 115.8, 102.5, 89.6, 76.9, 56.0, 55.9, 52.0, 51.3, 48.3, 41.0, 38.0, 37.3, 37.0, 36.2, 34.5, 33.0, 29.1, 26.1, 25.9, 25.8, 18.7, 18.6, 18.3, 16.0, -4.2, -4.4, -4.8, -4.9; IR (thin film) 2953, 2929, 2857, 1754, 1650, 1252, 1227  $\text{cm}^{-1}$ ; HRMS (ESI/TOF) calculated for  $\text{C}_{36}\text{H}_{64}\text{O}_5\text{Si}_2\text{S}_2\text{Na}$  ( $\text{M}+\text{Na}$ ) $^+$  719.3632, observed 719.3612;  $[\alpha]_D^{25} +29.8$ ,  $[\alpha]_{577}^{25} +30.3$ ,  $[\alpha]_{546}^{25} +28.5$ ,  $[\alpha]_{435}^{25} +8.2$ ,  $[\alpha]_{405}^{25} -37.3$ , ( $c = 0.5$ ,  $\text{CH}_2\text{Cl}_2$ ).

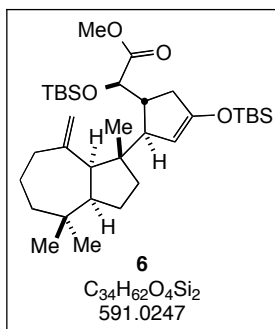

**Ester 6:** To a solution of **S2** (210 mg, 0.30 mmol) in toluene (6 mL) was added Bu<sub>3</sub>SnH (0.40 mL, 1.5 mmol) and the solution was degassed with Ar for 10 min. AIBN (14 mg, 0.090 mmol) was added to the solution and the yellow solution was placed in a 100 °C oil bath. After 5 min, the now clear solution was allowed to cool to r.t. and concentrated. Purification of the residue by silica gel chromatography (0→4% EtOAc/hexanes) gave **6** (150 mg, 85%) as a clear oil: R<sub>f</sub>: 0.53

(5% EtOAc/hexanes); <sup>1</sup>H NMR (C<sub>6</sub>D<sub>6</sub>, 500 MHz) δ 5.07 (d, *J* = 2.2 Hz, 1H), 4.93 (d, *J* = 2.2 Hz, 1H), 4.79 (s, 1H), 4.22 (d, *J* = 7.5 Hz, 1H), 3.38 (s, 3H), 2.95 (d, 1H), 2.75 (m, 1H), 2.60 (m, 1H), 2.32 (m, 2H), 2.04 (m, 1H), 1.82 (t, *J* = 12.6 Hz, 1H), 1.55 (m, 7H), 1.20 (m, 1H), 1.14 (s, 3H), 1.02 (s, 9H), 1.00 (s, 3H), 0.98 (s, 3H), 0.97 (s, 3H); <sup>13</sup>C NMR (C<sub>6</sub>D<sub>6</sub>, 125 MHz) δ 173.2, 155.7, 155.4, 114.6, 103.8, 76.9, 56.2, 55.8, 55.1, 51.2, 50.5, 41.3, 38.6, 38.4, 37.6, 37.1, 36.4, 34.9, 29.3, 27.2, 26.2, 26.1, 25.9, 20.9, 18.6, 18.3, -4.2, -4.4, -4.8, -4.9; IR (thin film) 2930, 1652, 1252, 838 cm<sup>-1</sup>; HRMS (ESI/TOF) calculated for C<sub>34</sub>H<sub>62</sub>O<sub>4</sub>Si<sub>2</sub>Na (M+Na)<sup>+</sup> 613.4084, observed 613.4083; [α]<sub>D</sub><sup>25</sup> +39.0, [α]<sub>577</sub><sup>25</sup> +36.7, [α]<sub>546</sub><sup>25</sup> +43.7, [α]<sub>435</sub><sup>25</sup> +82.7, [α]<sub>405</sub><sup>25</sup> +102.0, (*c* = 0.5, CH<sub>2</sub>Cl<sub>2</sub>).

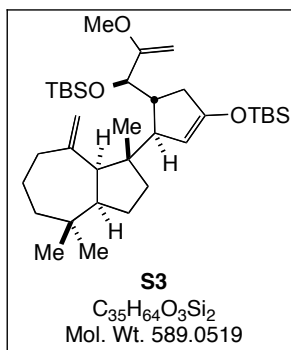

**Enol Ether S3:** The general procedure of Rainier was followed.<sup>4</sup> A stirring solution of TiCl<sub>4</sub> (0.19 mL, 1.70 mmol) in CH<sub>2</sub>Cl<sub>2</sub> (5 mL) was cooled to 0 °C and THF (0.5 mL) was added dropwise to generate a yellow solution. After 5 min, TMEDA (1.5 mL, 10 mmol) was added dropwise to form a red mixture. After 15 min, the solution was allowed to warm to rt and a mixture of Zn (230 mg, 3.5 mmol) and PbCl<sub>2</sub> (55 mg, 0.20 mmol) was added. The resulting mixture became a blue solution. After 15 min, a solution of ester **6** (150 mg, 0.25

mmol) and CH<sub>2</sub>Br<sub>2</sub> (0.12 mL, 1.7 mmol) in CH<sub>2</sub>Cl<sub>2</sub> (0.5 mL) was added. The solution became a dark mixture while refluxed for 1.5 h. The reaction mixture was cooled to rt and saturated aqueous K<sub>2</sub>CO<sub>3</sub> (10 mL) was very slowly added. The dark colored heterogenous mixture was filtered through a pad of silica with Et<sub>2</sub>O and the eluent was concentrated *in vacuo*. Purification of the residue by silica gel chromatography (0→4% EtOAc/hexanes) gave **S3** (145 mg, 97%): R<sub>f</sub>: 0.8 (5% EtOAc/hexanes); <sup>1</sup>H NMR (C<sub>6</sub>D<sub>6</sub>, 500 MHz) δ 5.14 (d, *J* = 2.4 Hz, 1H), 4.97 (d, *J* = 2.4 Hz, 1H), 4.82 (s, 1H), 4.20 (d, *J* = 1.7 Hz, 1H), 4.01 (d, *J* = 7.7 Hz, 1H), 3.93 (d, *J* = 1.7 Hz, 1H),

<sup>4</sup> Roberts, S.W.; Rainier, J. D. *Org. Lett.* **2007**, 9, 2227.

3.18 (s, 3H), 3.04 (d,  $J = 9.1$  Hz, 1H), 2.96 (bs, 1H), 2.72 (apt t,  $J = 8.0$  Hz, 1H), 2.60 (m, 1H), 2.35 (dd,  $J = 12.0, 4.4$  Hz, 1H), 2.23 (d,  $J = 16.5$  Hz, 1H), 2.07 (m, 1H), 1.87 (apt t,  $J = 12.8$  Hz, 1H), 1.63 (m, 5H), 1.50 (m, 2H), 1.23 (m, 1H), 1.22 (s, 3H), 1.04 (s, 9H), 1.01 (s, 6H), 0.97 (s, 9H), 0.21 (s, 3H), 0.205 (s, 3H), 0.19 (s, 3H), 0.12 (s, 3H);  $^{13}\text{C}$  NMR ( $\text{C}_6\text{D}_6$ , 125 MHz)  $\delta$  165.0, 155.9, 155.7, 114.5, 104.3, 83.4, 78.3, 56.4, 55.4, 55.2, 54.4, 50.7, 41.2, 39.0, 38.5, 38.0, 37.7, 36.5, 35.1, 29.4, 27.3, 26.4, 25.9, 21.0, 18.7, 18.3,  $-4.1$  (2C),  $-4.4$  (2C); IR (thin film) 2954, 1756, 1738, 1651, 1252  $\text{cm}^{-1}$ ; HRMS (ESI/TOF) calculated for  $\text{C}_{35}\text{H}_{64}\text{O}_3\text{Si}_2\text{Na}$  ( $\text{M}+\text{Na}$ ) $^+$  611.4292, observed 611.4269;  $[\alpha]_D^{25} +37.1$ ,  $[\alpha]_{577}^{25} +44.2$ ,  $[\alpha]_{546}^{25} +46.2$ ,  $[\alpha]_{435}^{25} +79.6$ ,  $[\alpha]_{405}^{25} +90.5$  ( $c = 0.5$ ,  $\text{CH}_2\text{Cl}_2$ ).

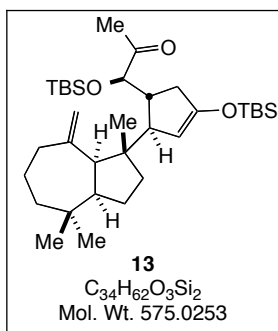

**Ketone 13:** To a solution of enol ether **S3** (100 mg, 0.17 mmol) in *t*-BuOH (1.7 mL) and  $\text{H}_2\text{O}$  (0.75 mL) at  $0^\circ\text{C}$  was added oxalic acid (24 mg, 0.22 mmol) and the solution was allowed to warm to rt. After 2 h, saturated aqueous  $\text{NaHCO}_3$  (10 mL) and  $\text{Et}_2\text{O}$  (10 mL) were added to the solution. The layers were separated and the aqueous layer was washed with additional  $\text{Et}_2\text{O}$  (10 mL). The organic phases were combined, dried over  $\text{Na}_2\text{SO}_4$ , filtered, and concentrated. Purification

of the residue by silica gel chromatography (1 $\rightarrow$ 2% EtOAc/hexanes) gave ketone **13** (56 mg, 57%) as a colorless oil:  $R_f$ : 0.53 (5% EtOAc/hexanes);  $^1\text{H}$  NMR ( $\text{C}_6\text{D}_6$ , 500 MHz)  $\delta$  4.96 (d,  $J = 2.4$  Hz, 1H), 4.88 (d,  $J = 2.3$  Hz, 1H), 4.76 (s, 1H), 3.86 (d,  $J = 8.5$  Hz, 1H), 2.97 (d,  $J = 9.1$  Hz, 1H), 2.87 (bs, 1H), 2.45 (m, 2H), 2.30 (dd,  $J = 12.1, 4.2$  Hz, 1H), 2.20 (m, 1H), 2.06 (s, 3H), 2.00 (m, 1H), 1.82 (apt t,  $J = 12.4$  Hz, 1H), 1.68 (m, 1H), 1.59 (m, 3H), 1.48 (m, 2H), 1.39 (m, 1H), 1.23 (m, 1H), 1.16 (s, 3H), 1.00 (s, 3H), 0.95 (s, 12H), 0.94 (s, 9H), 0.19 (s, 6H), 0.23 (s, 3H),  $-0.01$  (s, 3H);  $^{13}\text{C}$  NMR ( $\text{C}_6\text{D}_6$ , 125 Mhz)  $\delta$  209.1, 156.0, 155.9, 114.3, 103.7, 82.9, 56.6, 56.1, 55.3, 50.6, 40.1, 38.9, 38.4, 37.6, 36.4, 36.1, 35.0, 29.4, 27.2, 26.2, 26.1, 25.9, 24.6, 20.7, 18.4, 18.3,  $-4.3$ ,  $-4.4$ ,  $-4.7$ ,  $-4.8$ ; IR (thin film) 2953, 2930, 1714, 1649, 1253  $\text{cm}^{-1}$ ; HRMS (ESI/TOF) calculated for  $\text{C}_{34}\text{H}_{62}\text{O}_3\text{Si}_2\text{Na}$  ( $\text{M}+\text{Na}$ ) $^+$   $\text{C}_{34}\text{H}_{62}\text{O}_3\text{Si}_2$  597.4135, observed 597.4137;  $[\alpha]_D^{25} +59.9$ ,  $[\alpha]_{577}^{25} +62.2$ ,  $[\alpha]_{546}^{25} +70.8$ ,  $[\alpha]_{435}^{25} +141.8$ ,  $[\alpha]_{405}^{25} +181.3$  ( $c = 1.0$ ,  $\text{CH}_2\text{Cl}_2$ ).

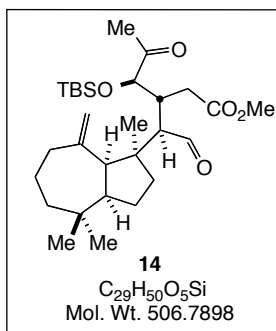

**Tricarbonyl 14:** To a mixture of **13** (16 mg, 0.028 mmol) in THF (0.3 mL) and H<sub>2</sub>O (30  $\mu$ L) at 0 °C was added NMO (4.9 mg, 0.042 mmol). The mixture was stirred for 5 min until the NMO dissolved. A 2.5% solution of OsO<sub>4</sub> in *t*-BuOH (27  $\mu$ L, 0.0028 mmol) was added and the mixture was allowed to warm to rt. After 8 h, solid sodium sulfite (5 mg) was added and the mixture was stirred for an additional 5 min. The mixture was diluted with H<sub>2</sub>O (2 mL) and Et<sub>2</sub>O (2 mL). The layers

were separated and the aqueous layer was washed with additional Et<sub>2</sub>O (2 mL) to afford the crude  $\alpha$ -hydroxy-ketone. To a solution of crude  $\alpha$ -hydroxy-ketone in MeOH (0.015 mL) and benzene (0.015 mL) at 0 °C was added Pb(OAc)<sub>4</sub> (23 mg, 0.054 mmol). After 10 min, saturated aqueous NaHCO<sub>3</sub> (0.3 mL) was added to the yellow solution, and a brown precipitate was formed. After being stirred for 5 min, the mixture was diluted with Et<sub>2</sub>O (2 mL) and passed through a glass pipette contained NaSO<sub>4</sub> on top of a short layer (~1 cm) of SiO<sub>2</sub> using Et<sub>2</sub>O as an eluent. The resulting light yellow solution was concentrated. Rapid purification of the residue by silica gel chromatography (1 $\rightarrow$ 5% EtOAc/hexanes) gave tricarbonyl **14** (11 mg, 81%) as a colorless oil: R<sub>f</sub>: 0.46 (10% EtOAc/hexanes); <sup>1</sup>H NMR (C<sub>6</sub>D<sub>6</sub>, 500 MHz)  $\delta$  9.94 (d, *J* = 2.7 Hz, 1H), 4.95 (s, 1H), 4.91 (s, 1H), 4.32 (d, *J* = 2.7 Hz, 1H), 3.30 (s, 3H), 3.16 (m, 1H), 2.88 (dd, *J* = 17.8, 1.8 Hz, 1H), 2.82 (d, *J* = 2.4 Hz, 1H), 2.79 (d, *J* = 10.2 Hz, 1H), 2.73 (dd, *J* = 17.8, 10.2 Hz, 1H), 2.17 (s, 3H), 2.16 (m, 1H), 1.94 (m, 1H), 1.47 (m, 8H), 1.15 (m, 1H), 1.10 (s, 3H), 1.05 (s, 3H), 0.95 (s, 9H), 0.93 (s, 3H), -0.01 (s, 6H); <sup>13</sup>C NMR (C<sub>6</sub>D<sub>6</sub>, 125 MHz)  $\delta$  208.7, 204.1, 173.2, 153.4, 115.3, 81.6, 56.9, 56.6, 53.3, 51.4, 49.3, 39.2, 38.4, 38.0, 37.2, 36.2, 34.5, 33.9, 29.2, 26.5, 26.0, 25.9, 25.8, 22.9, 18.4, -4.7, -5.3; IR (thin film) 2952, 2848, 1732, 1695, 1254, 839 cm<sup>-1</sup>; HRMS (ESI/TOF) calculated for C<sub>29</sub>H<sub>50</sub>O<sub>5</sub>Si (M+Na)<sup>+</sup> 529.3325, observed 529.3323; [ $\alpha$ ]<sub>D</sub><sup>25</sup> +19.8, [ $\alpha$ ]<sub>577</sub><sup>25</sup> +22.6, [ $\alpha$ ]<sub>546</sub><sup>25</sup> +24.4, [ $\alpha$ ]<sub>435</sub><sup>25</sup> +46.2, [ $\alpha$ ]<sub>405</sub><sup>25</sup> +62.5 (*c* = 0.2, CHCl<sub>3</sub>).

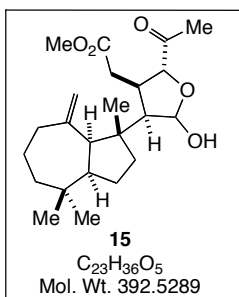

**Lactol 15:** To a solution of aldehyde **14** (13 mg, 0.026 mmol) in THF (0.25 mL) at 0 °C was added 1M TBAF in THF (28  $\mu$ L, 0.028 mmol). The solution was maintained at 0 °C for 30 min and then SiO<sub>2</sub> (~200 mg) was added. The mixture was stirred for 5 min, loaded onto an SiO<sub>2</sub> column, and eluted with 20–40% EtOAc/hexanes to afford **15** (7.0 mg, 69%) as a clear oil and a ~10:1 mixture of unassigned lactol diastereomers: R<sub>f</sub>: 0.35 (30% EtOAc/hexanes); <sup>1</sup>H NMR (C<sub>6</sub>D<sub>6</sub>, 500 MHz, for major isomer)  $\delta$  5.43 (bs, 1H), 4.76 (d, *J* = 2.1 Hz, 1H), 4.71 (s, 1H), 4.45 (bs, 1H), 4.38 (s, 1H), 3.43 (s, 3H), 2.89 (m, 1H), 2.59 (dd, *J* =



16.5, 2.8 Hz, 1H), 2.40 (dd,  $J = 10.2, 5.6$  Hz, 1H), 2.25 (t,  $J = 5.3$  Hz, 1H), 2.20 (dd,  $J = 12.3, 5.0$  Hz, 1H), 1.91 (s, 3H), 1.83 (m, 1H), 1.50 (m, 9H), 1.23 (m, 1H), 1.04 (s, 3H), 0.94 (s, 3H), 0.79 (s, 3H);  $^{13}\text{C}$  NMR ( $\text{C}_6\text{D}_6$ , 125 MHz)  $\delta$  210.2, 172.9, 154.1, 114.7, 101.4, 88.1, 58.9, 55.4, 54.1, 51.3, 46.6, 42.1, 38.1, 38.0, 37.7, 36.2, 34.6, 34.4, 28.9, 27.3, 25.9, 25.7, 24.2; IR (thin film) 2954, 2848, 1736, 1437, 1260  $\text{cm}^{-1}$ ; HRMS (ESI/TOF) calculated for  $\text{C}_{23}\text{H}_{36}\text{O}_5\text{Na}$  ( $\text{M}+\text{Na}$ ) $^+$  415.2460, observed 415.2458;  $[\alpha]_D^{25} +20.6$ ,  $[\alpha]_{577}^{25} +17.6$ ,  $[\alpha]_{546}^{25} +18.8$ ,  $[\alpha]_{435}^{25} +29.3$ ,  $[\alpha]_{405}^{25} +35.4$  ( $c = 0.3$ ,  $\text{CHCl}_3$ ).

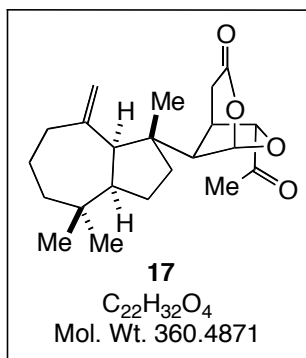

**6-acyl-2,7-dioxabicyclo[3.2.1]octan-3-one (17)**

To a solution of **15** (4.5 mg, 0.011 mmol) in  $\text{CH}_2\text{Cl}_2$  (200  $\mu\text{L}$ ) at  $-78$   $^\circ\text{C}$  was added DAST (3.0  $\mu\text{L}$ , 0.017 mmol). After 10 min, saturated aqueous  $\text{NaHCO}_3$  (1 mL) and  $\text{CH}_2\text{Cl}_2$  (1 mL) were added and the layers were separated. The layers were separated and the aqueous layer was washed with additional  $\text{CH}_2\text{Cl}_2$  ( $2 \times 2$  mL). The organic phases were combined, dried over  $\text{Na}_2\text{SO}_4$ , filtered, and concentrated to yield crude **16** as clear oil and a  $\sim 5:1$  mixture of unassigned lactol diastereomers. Characteristic  $^1\text{H}$ -NMR and M.S. data for **16**:  $R_f$ : 0.37, 0.44 (30% EtOAc/hexanes);  $^1\text{H}$  NMR ( $\text{C}_6\text{D}_6$ , 500 MHz, for major isomer)  $\delta$  5.96 (dd,  $J = 57, 2.4$  Hz, 1H), 4.68 (s, 1H), 4.66 (s, 1H), 4.52 (s, 1H), 3.29 (s, 3H), 3.00 (m, 1H), 2.86 (d,  $J = 8.0$  Hz, 1H), 2.85 (s, 1H), 2.72 (m, 2H), 2.20 (m, 2H), 1.96 (s, 3H), 1.86 (m, 2H), 1.44 (m, 6H), 1.13 (m, 2H), 0.94 (s, 3H), 0.91 (s, 3H), 0.86 (s, 3H); HRMS (ESI/TOF) calculated for  $\text{C}_{23}\text{H}_{34}\text{O}_4\text{F}$  ( $\text{M}+\text{Na}$ ) $^+$  383.2198, observed 383.2202. Crude **16** was dissolved in EtOH (200  $\mu\text{L}$ ) and 1N NaOH was added (22  $\mu\text{L}$ , 0.022 mmol). The mixture was stirred for 1 h at r.t. and 1N HCl (4 mL) and  $\text{CH}_2\text{Cl}_2$  (2 mL) was added. The layers were separated and the aqueous layer was washed with additional  $\text{CH}_2\text{Cl}_2$  ( $5 \times 2$  mL). The organic phases were combined, dried over  $\text{Na}_2\text{SO}_4$ , filtered, and concentrated to yield the crude carboxylic acid, which was used without further purification. The crude acid was dissolved in benzene and concentrated ( $3\times$ ). The acid was then dissolved in DMF (300  $\mu\text{L}$ ) and  $\text{SnCl}_2$  (3.0 mg, 0.017 mmol) was added. The mixture was stirred at rt during which time a clear solution was formed. After 18 h, saturated aqueous  $\text{NaHCO}_3$  (2 mL) and  $\text{CH}_2\text{Cl}_2$  (2 mL) were added. The layers were separated and the aqueous layer was washed with additional  $\text{CH}_2\text{Cl}_2$  ( $2 \times 2$  mL). The organic phases were combined, dried over  $\text{Na}_2\text{SO}_4$ , filtered, and concentrated. Purification of the residue by silica gel chromatography (20 $\rightarrow$ 30% EtOAc/hexanes) gave ketone **17** (3.5 mg, 76%) as a film:  $R_f$ : 0.46 (30% EtOAc/hexanes);  $^1\text{H}$

NMR ( $C_6D_6$ , 500 MHz)  $\delta$  5.53 (d,  $J = 1.8$  Hz, 1H), 4.77 (d,  $J = 1.9$  Hz, 1H), 4.50 (d,  $J = 1.9$  Hz, 1H), 3.62 (s, 1H), 2.73 (m, 1H), 2.66 (dd,  $J = 18.9, 5.0$  Hz, 1H), 2.61 (d,  $J = 9.4$  Hz, 1H), 2.25 (m, 1H), 2.21 (d,  $J = 19.2$  Hz, 1H), 1.88 (s, 3H), 1.79 (m, 2H), 1.67 (m, 3H), 1.46 (m, 4H), 1.25 (m, 2H), 1.06 (s, 3H), 0.94 (s, 3H), 0.89 (s, 3H);  $^{13}C$  NMR ( $C_6D_6$ , 125 MHz)  $\delta$  205.4, 167.2, 153.2, 114.7, 100.9, 89.2, 57.8, 53.9, 51.3, 45.7, 38.2, 37.7, 36.0, 35.9, 35.2, 34.3, 30.2, 28.5, 26.9, 26.4, 26.1, 23.8; IR (thin film) 2922, 1755, 1712, 1377, 945  $cm^{-1}$ ; HRMS (ESI/TOF) calculated for  $C_{22}H_{32}O_4$  (M+Na) $^+$  383.2198, observed 383.2202;  $[\alpha]_D^{25}$  -6.8,  $[\alpha]_{577}^{25}$  -5.8,  $[\alpha]_{546}^{25}$  -13.4,  $[\alpha]_{435}^{25}$  -17.2,  $[\alpha]_{405}^{25}$  -26.6. ( $c = 0.23$ ,  $CH_2Cl_2$ ).

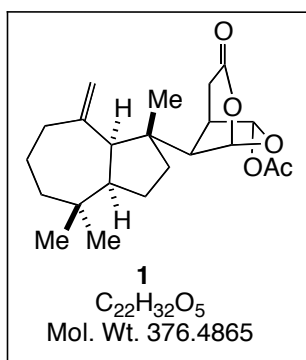

**Aplyviolene (1):** To a stirred mixture of **17** (3.0 mg, 0.0083 mmol) and  $NaHCO_3$  (17 mg, 0.21 mmol) in  $CH_2Cl_2$  (150  $\mu$ L) at 0  $^{\circ}C$  was added *m*-CPBA (1.8 mg, 0.012 mmol) in  $CH_2Cl_2$  (150  $\mu$ L). The stirred mixture was maintained at 0  $^{\circ}C$ . After 18 h, saturated aqueous sodium thiosulfate was added and the mixture was stirred at rt for 30 min. The mixture was diluted with  $H_2O$  (0.5 mL) and  $CH_2Cl_2$  (1 mL) and the layers were separated. The aqueous layer was washed with additional  $CH_2Cl_2$  (2  $\times$  2 mL). The organic phases were combined, dried over  $Na_2SO_4$ , filtered, and concentrated. Purification of the residue by silica gel chromatography (1 $\rightarrow$ 2% EtOAc/hexanes) gave **1** (1.9 mg, 61%) as a film. The NMR and IR data was good match for published data.<sup>5</sup> However, we found a slight frame shift between the published  $^1H$  NMR data and our own suggesting a slightly different benzene solvent reference value was used. The carbon data matched almost exactly (Table S1), however it was found that to observe the C20 carbon ( $\delta$  34.3), the sample had to be heated to 40  $^{\circ}C$ . Our  $^1H$ -NMR spectra matched precisely with that obtained by the Gerwick lab when they kindly purified a small sample ( $\sim$ 30  $\mu$ g) for us from the original sample from the Faulkner isolation studies (Figure S1).<sup>6</sup> The NMR data we obtained at 40 $^{\circ}C$  follows:  $^1H$  NMR ( $C_6D_6$ , 500 MHz, 40  $^{\circ}C$ )  $\delta$  6.05 (s, 1H), 5.48 (d,  $J = 1.6$  Hz, 1H), 4.69 (d,  $J = 2.1$  Hz, 1H), 4.41 (d,  $J = 2.1$  Hz, 1H), 2.51 (d,  $J = 9.3$  Hz, 1H), 2.47 (dd,  $J = 19.5, 5.8$  Hz, 1H), 2.29 (m, 1H), 2.15 (m, 1H), 2.12 (d,  $J = 19.5$  Hz, 1H), 2.02 (m, 1H), 1.71 (m, 1H), 1.57 (m, 3H), 1.53 (s, 3H), 1.37 (m, 4H), 1.15 (m, 2H), 0.92 (s, 3H), 0.83 (s, 3H), 0.80 (s, 3H);  $^{13}C$  NMR

<sup>5</sup> Hambley, T.W.; Poiner, A.; Taylor, W. *Aus. J. Chem.* **1990**, *43*, 1861.

<sup>6</sup> Bobzin, S. C.; Faulkner, D. J. *J. Nat. Prod.* **1991**, *54*, 225.

(C<sub>6</sub>D<sub>6</sub>, 125 MHz)  $\delta$  168.5, 166.4, 153.5, 114.7, 101.1, 100.6, 58.1, 54.3, 49.6, 45.8, 38.7, 38.5, 38.2, 37.8, 36.1, 34.3, 33.3, 28.6, 27.0, 26.1, 23.9, 20.5.

**Table S1. Comparison of published and synthetic C<sup>13</sup> spectra**

| carbon # | Published <sup>5</sup> | Synthetic |
|----------|------------------------|-----------|
| COMe     | 21.1                   | 20.5      |
| 18       | 23.8                   | 23.9      |
| 19       | 26.0                   | 26.1      |
| 6        | 26.9                   | 27.0      |
| 2        | 28.3                   | 28.6      |
| 12       | 33.1                   | 33.3      |
| 20       | 34.3                   | 34.3      |
| 4        | 36.0                   | 36.1      |
| 1        | 37.6                   | 37.8      |
| 3        | 38.0                   | 38.2      |
| 13       | 38.2                   | 38.5      |
| 7        | 38.5                   | 38.7      |
| 8        | 45.5                   | 45.8      |
| 14       | 49.2                   | 49.6      |
| 5        | 54.1                   | 54.3      |
| 9        | 57.8                   | 58.1      |
| 15       | 100.8                  | 100.6     |
| 16       | 100.9                  | 101.1     |
| 17       | 114.7                  | 114.7     |
| 10       | 153.1                  | 153.5     |
| 11       | 167.7                  | 166.4     |
| CO       | 169.5                  | 168.5     |

X-ray structure of 7 (CCDC-840473)

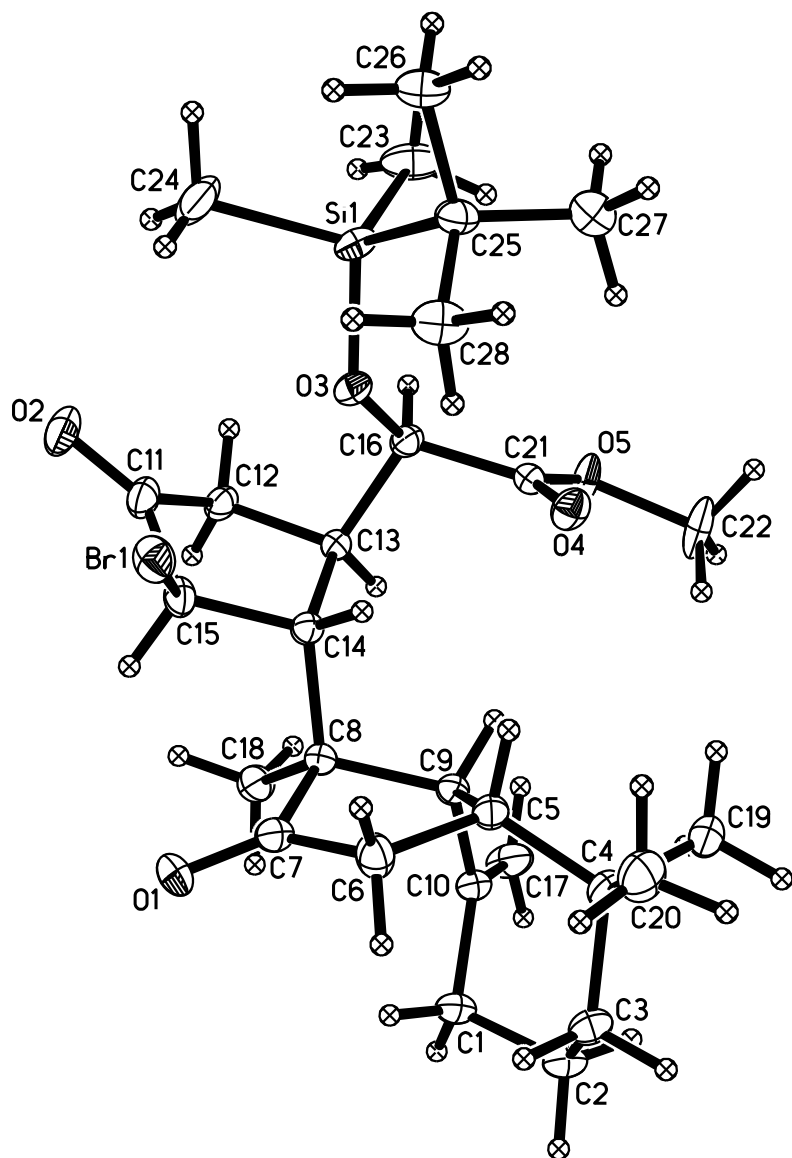

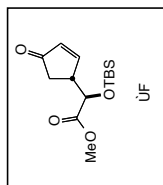

Current Data Parameters  
 USER schner  
 NAME m183-10c13  
 EXPNO 1  
 PROCNO 1

F2 - Acquisition Parameters  
 Date\_ 20110819  
 Time 10:07  
 INSTRUM cryo300  
 PULPROG zgpg30  
 FIDRES 5 mm CPIC1  
 TD 81728  
 SOLVENT CDCl3  
 NS 5  
 DS 2  
 SWH 8012.820 Hz  
 FIDRES 0.098043 Hz  
 AQ 5.0998774 sec  
 RG 3.6  
 DW 62.400 usec  
 DE 6.00 usec  
 TE 298.0 K  
 MCFRESF 0.1000000 sec  
 MCHNK 0.01500000 sec

==== CHANNEL f1 =====  
 NU1 1H  
 P1 7.50 usec  
 PL1 1.60 dB  
 SFO1 500.2235015 MHz

F2 - Processing parameters  
 SI 65536  
 SF 500.2230415 MHz  
 EQ  
 F1 0.30 Hz  
 GB 0  
 PC 4.00

1D NMR plot parameters  
 CX 22.80 cm  
 CY 15.00 cm  
 F1P 9.316 ppm  
 F1 4660.01 Hz  
 F2P -0.805 ppm  
 F2 -402.82 Hz  
 PRCH 0.44351 ppm/cm  
 HZCX 222.05385 Hz/cm

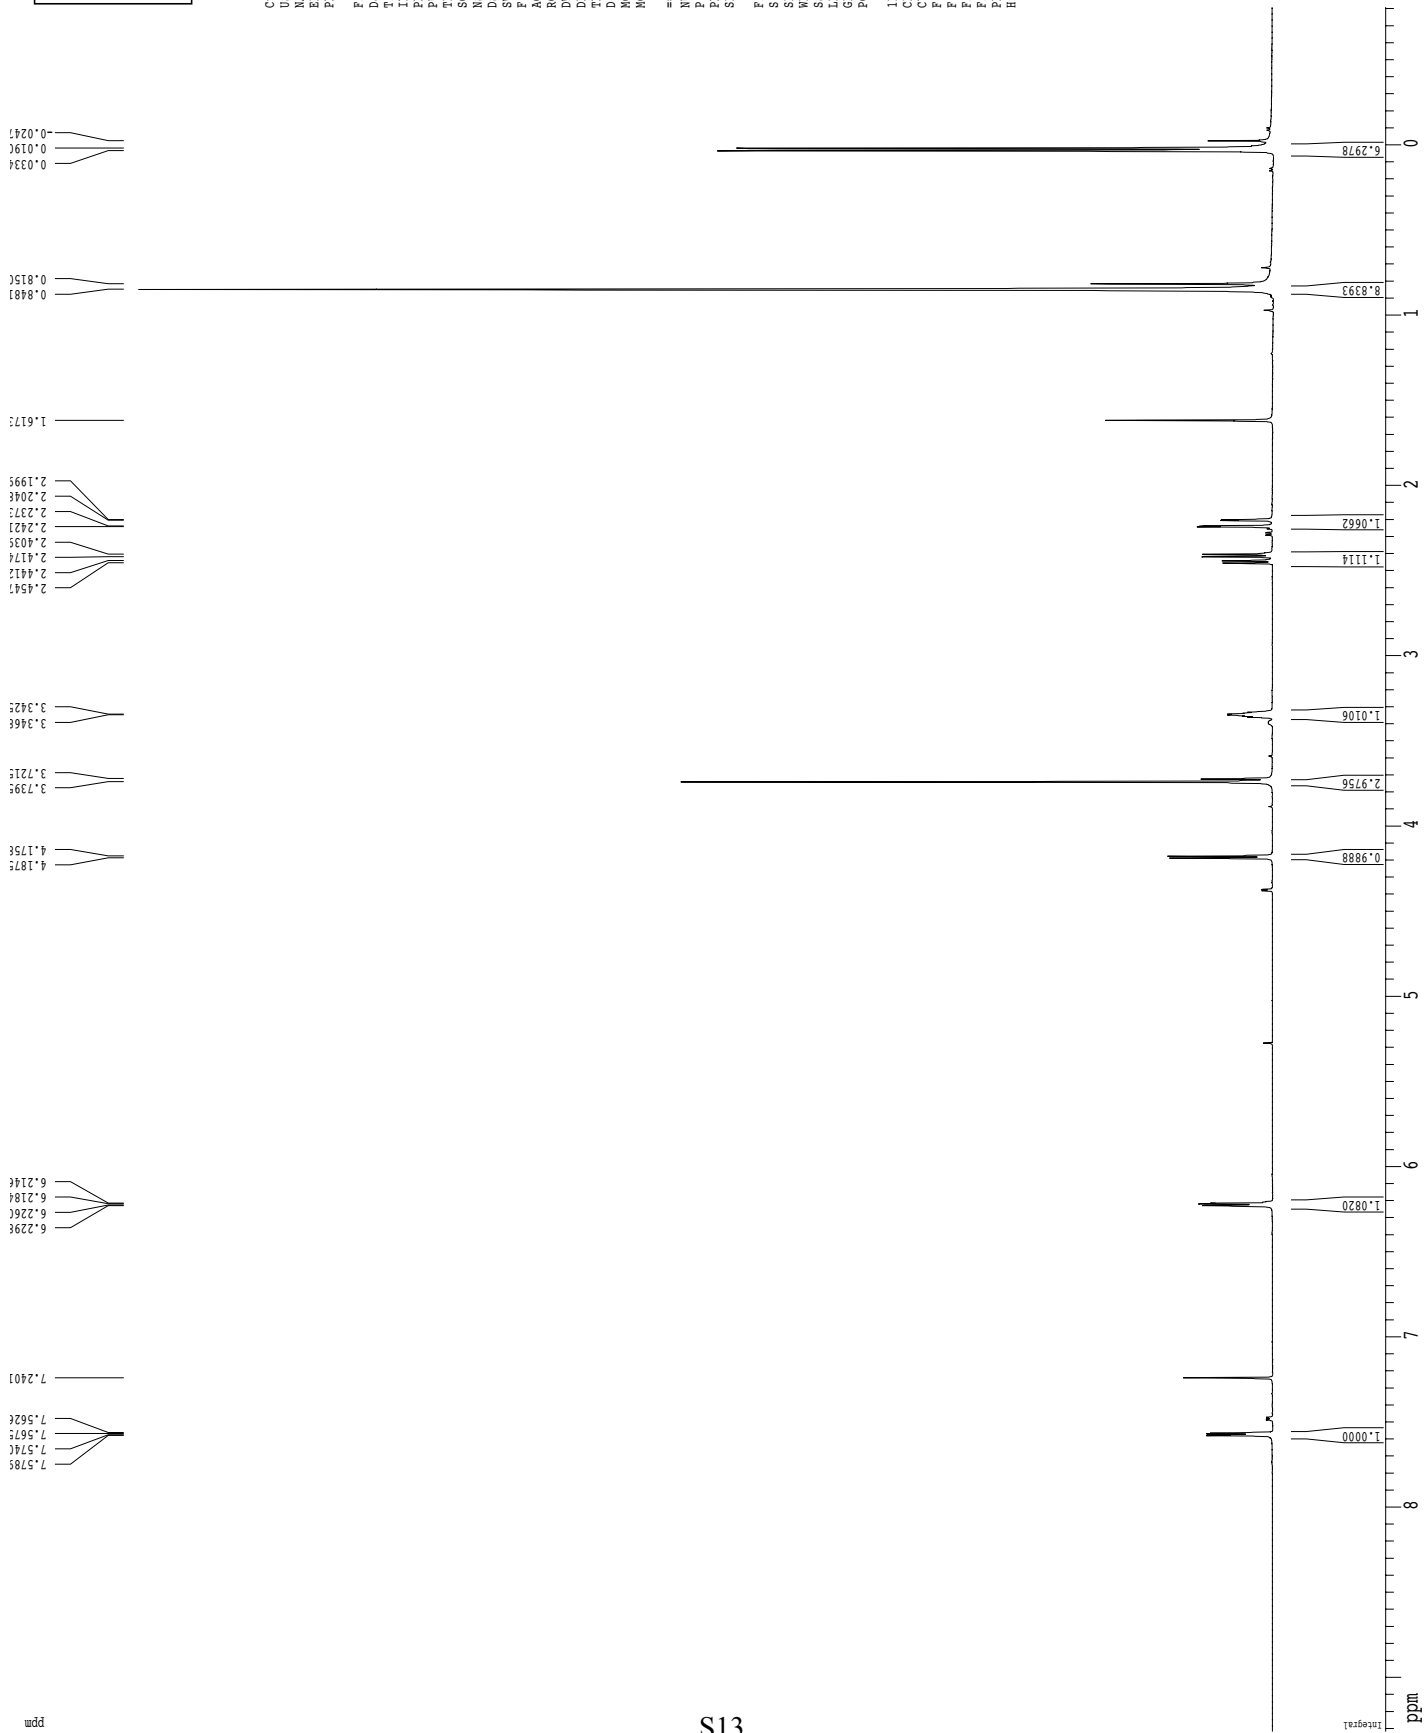

Z-restored spin-echo <sup>13</sup>C spectrum with <sup>1</sup>H decoupling

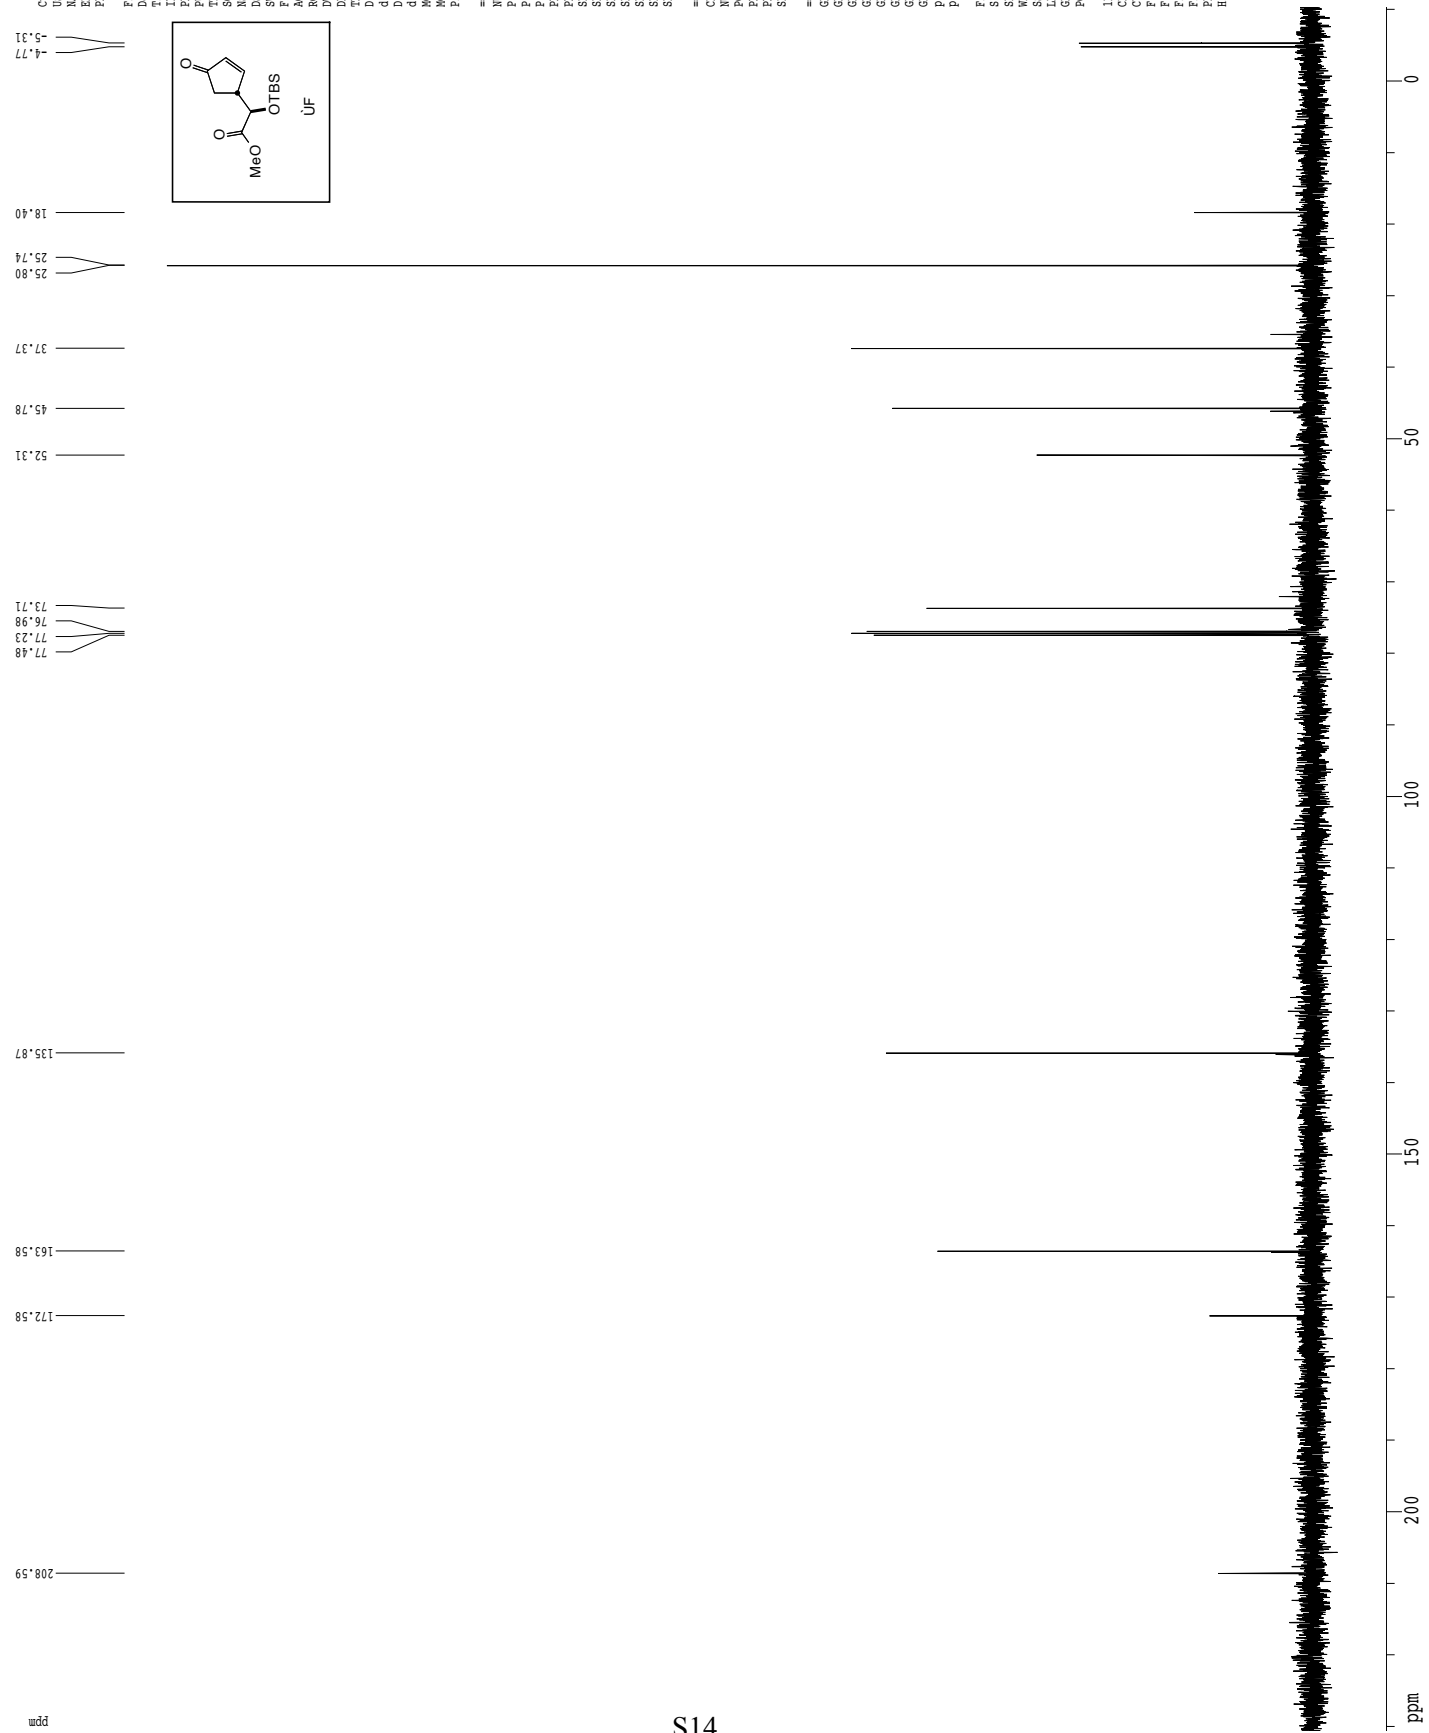



Z-restored spin-echo 13C spectrum with 1H decoupling

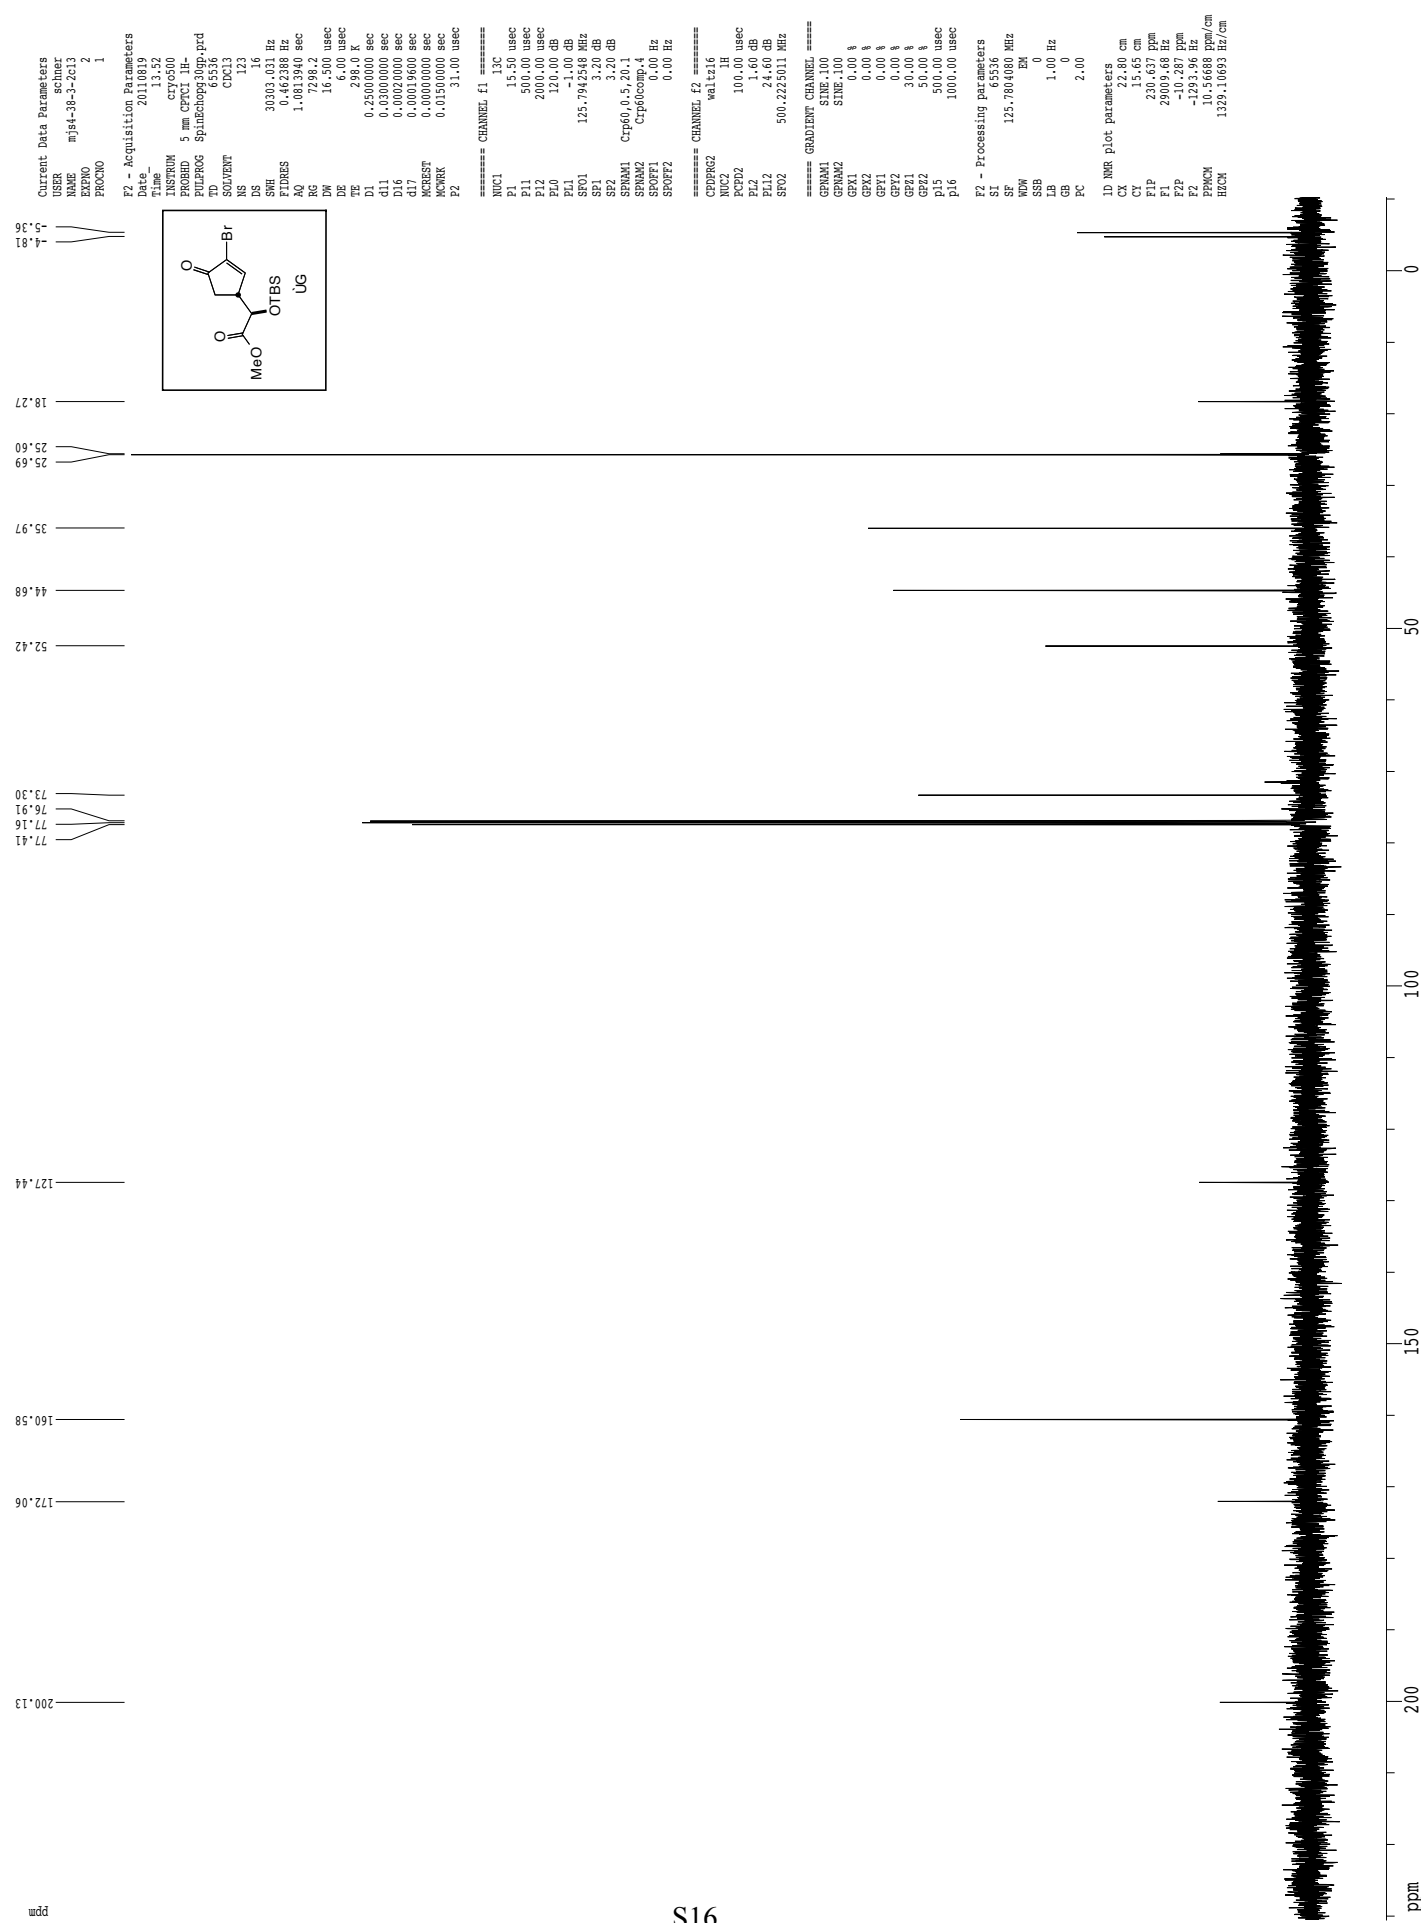



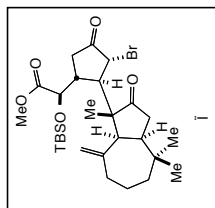

Current Data Parameters  
 USER schner  
 NAME m184-70-3-c13  
 EXPNO 1  
 PROCNO 1

F2 - Acquisition Parameters  
 Date\_ 20110511  
 Time 14.35  
 INSTRUM cryo300  
 PULPROG zgpg30  
 FIDRES 5 mm CPIC1 6230  
 TD 81728  
 SOLVENT 6666  
 NS 6  
 DS 2  
 SWH 8012.820 Hz  
 FIDRES 0.098043 Hz  
 AQ 5.0998774 sec  
 RG 5  
 DW 62.400 usec  
 DE 6.00 usec  
 TE 298.0 K  
 MCFREQ 0.10000000 sec  
 MCHNK 0.01500000 sec

==== CHANNEL f1 =====  
 NUCL 1H  
 P1 7.50 usec  
 PL1 1.60 dB  
 SFO1 500.2235015 MHz

F2 - Processing parameters  
 SI 65536  
 SF 500.2200013 MHz  
 WDW EM  
 SS 0  
 LB 0.30 Hz  
 GB 0  
 PC 4.00

1D NMR plot parameters  
 CX 22.80 cm  
 CY 15.00 cm  
 F1P 7.656 ppm  
 F1 3829.45 Hz  
 F2P -0.466 ppm  
 F2 -233.16 Hz  
 PRCH 0.35621 ppm/cm  
 HZCX 176.18475 Hz/cm

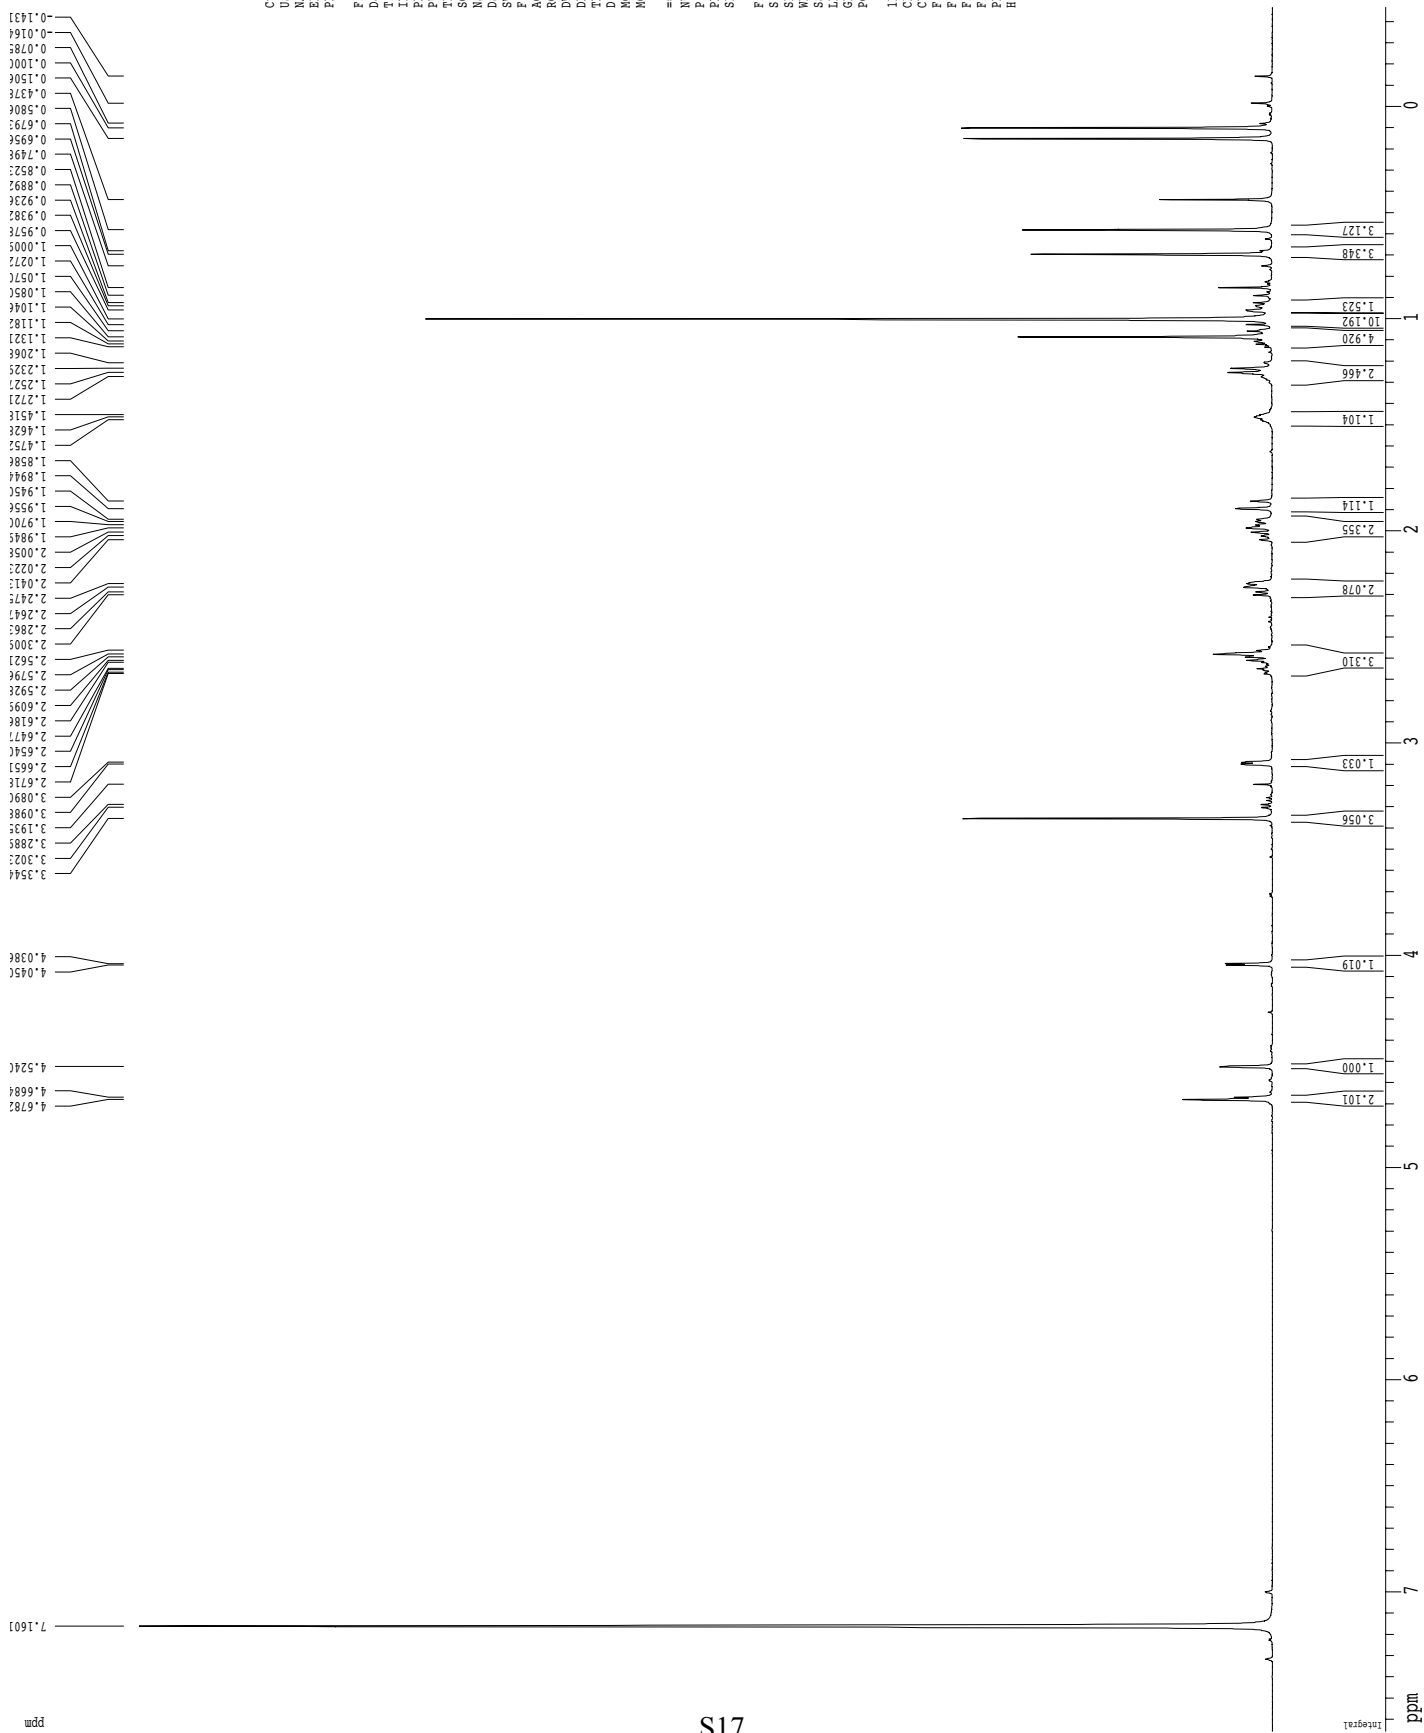

Z-restored spin-echo <sup>13</sup>C spectrum with <sup>1</sup>H decoupling

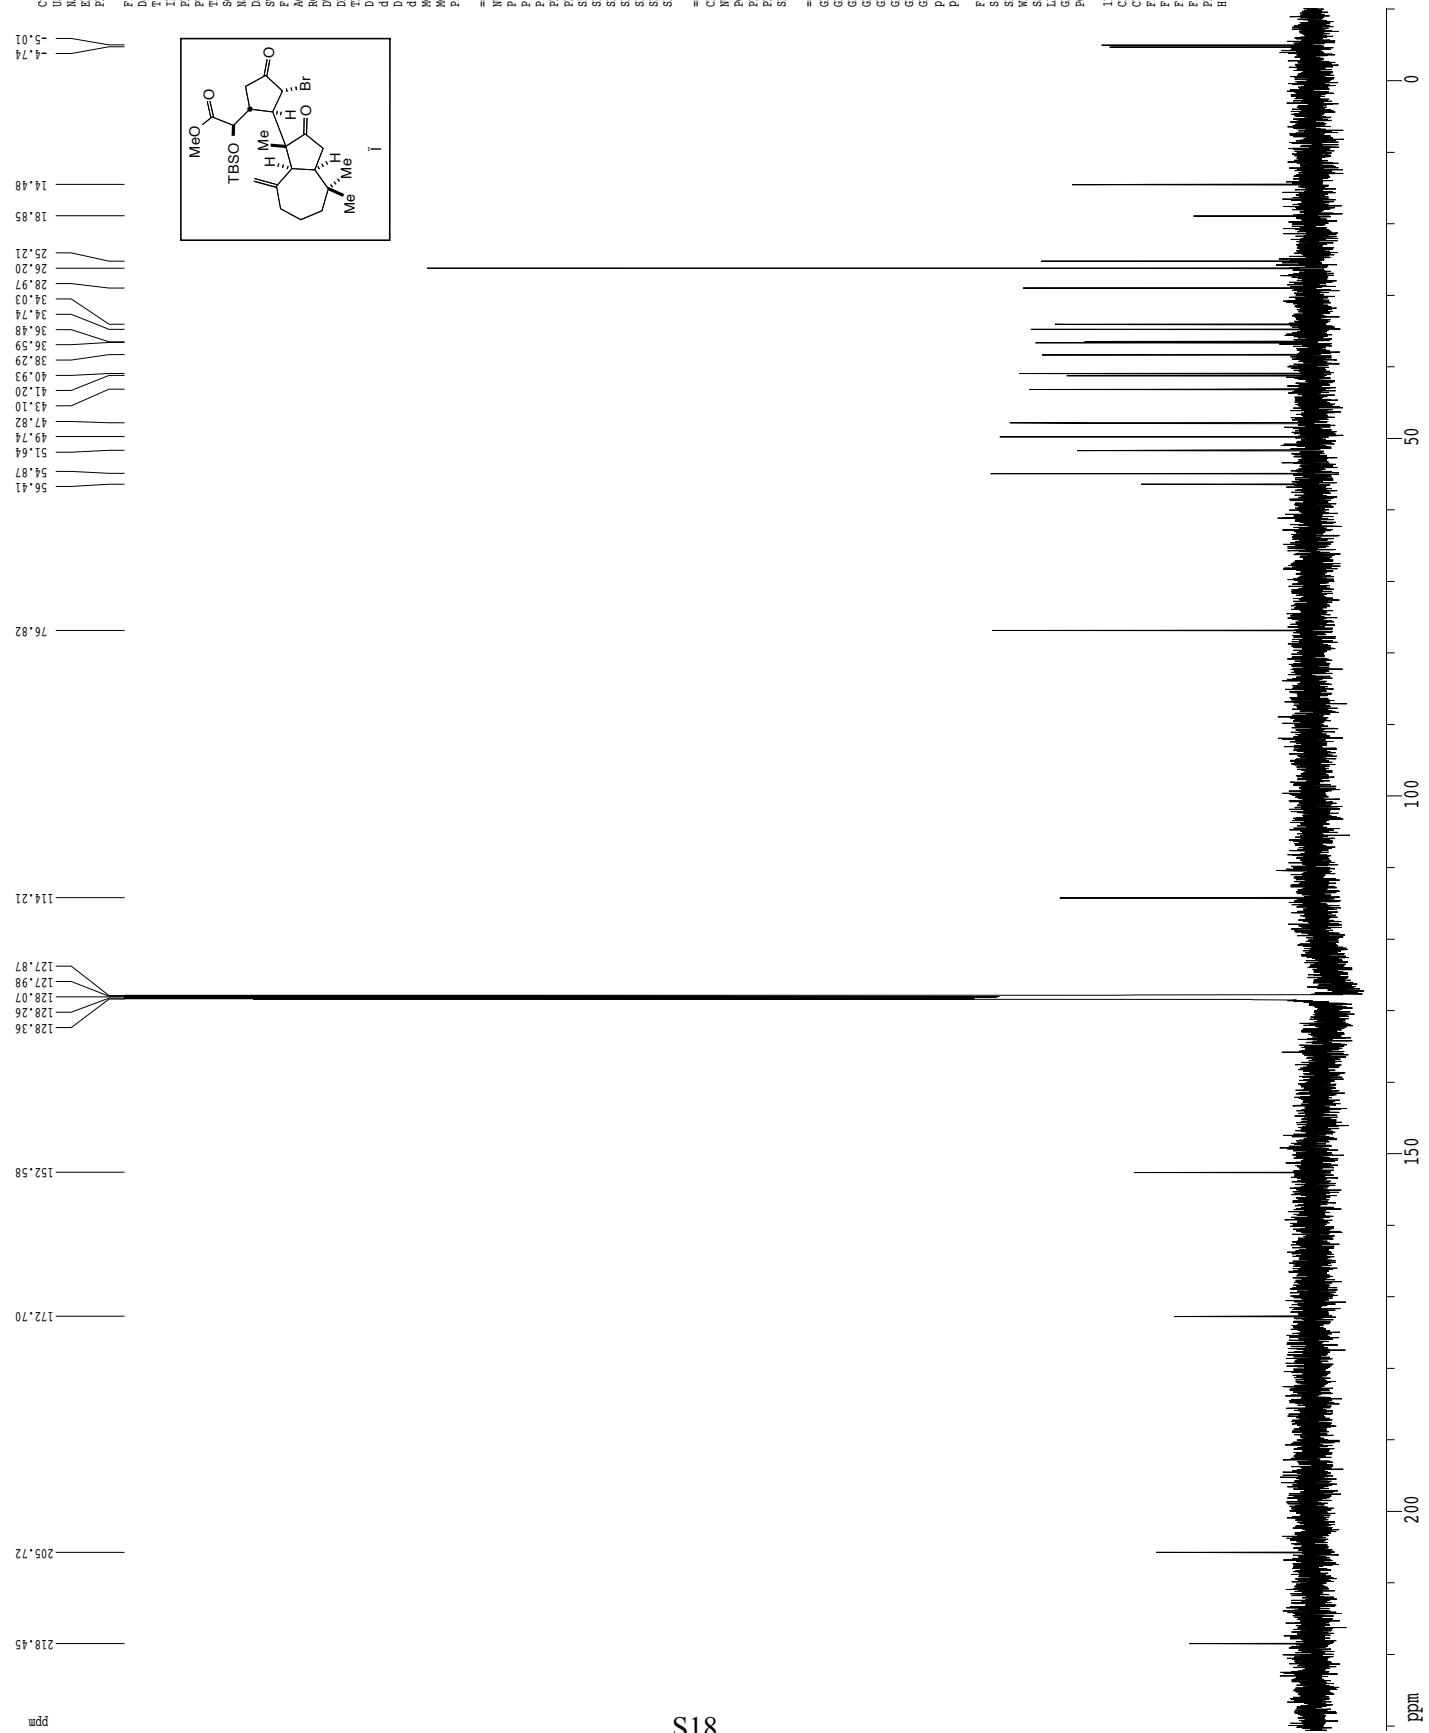

SUPPORTING INFORMATION Overman, L. E.; Schnermann, M. J.

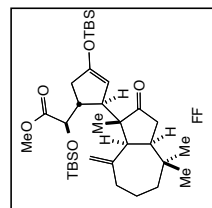

Current Data Parameters  
 USER schner  
 NAME mjs4-47-3  
 EXPNO 1  
 PROCNO 1

F2 - Acquisition Parameters  
 Date\_ 20110427  
 Time 11.45  
 INSTRUM cryo300  
 PULPROG zgpg30  
 FIDRES 5 mm CPXCL 420  
 TD 81728  
 SOLVENT C6D6  
 NS 8  
 DS 2  
 SWH 8012.820 Hz  
 FIDRES 0.098043 Hz  
 AQ 5.0998774 sec  
 RG 3.6  
 DW 62.400 usec  
 DE 6.00 usec  
 TE 298.0 K  
 MCFRESF 0.1000000 sec  
 MCFRESY 0.0000000 sec  
 MCFRFX 0.0150000 sec

==== CHANNEL f1 =====  
 NU1 1H  
 P1 7.50 usec  
 PL1 1.60 dB  
 SFO1 500.2235015 MHz

F2 - Processing parameters  
 SI 65536  
 SF 500.2200012 MHz  
 EQ  
 F2 0.30 Hz  
 GB 0  
 PC 1.00

1D NMR plot parameters  
 CX 22.80 cm  
 CY 15.00 cm  
 F1P 7.431 ppm  
 F1 3717.17 Hz  
 F2P -0.370 ppm  
 F2 -184.86 Hz  
 PRCH 0.38213 ppm/cm  
 HZCX 171.14188 Hz/cm

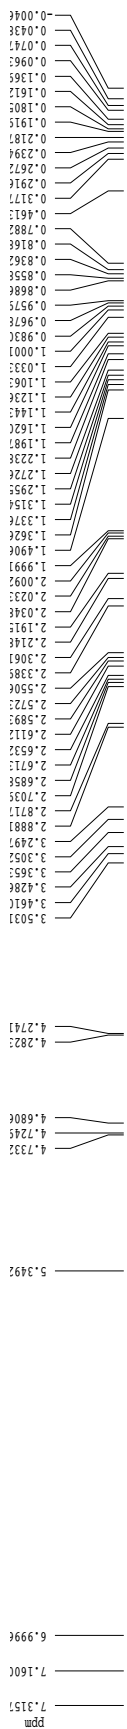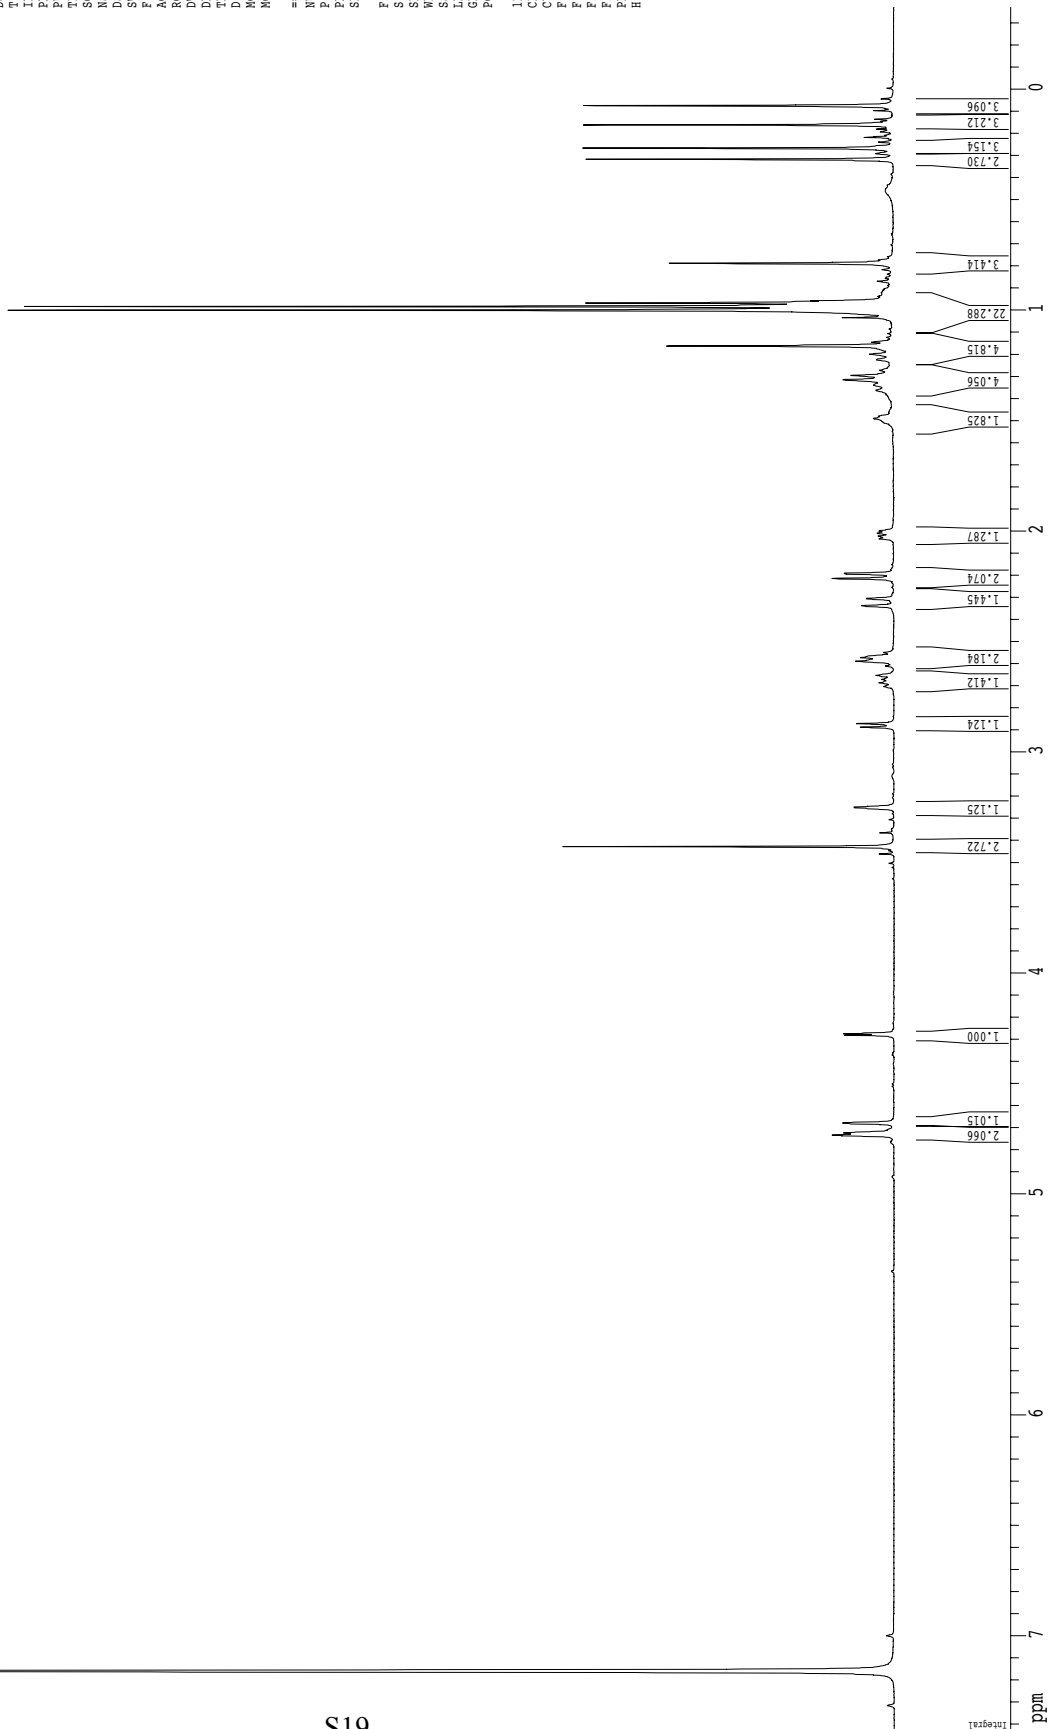

Z-restored spin-echo <sup>13</sup>C spectrum with <sup>1</sup>H decoupling

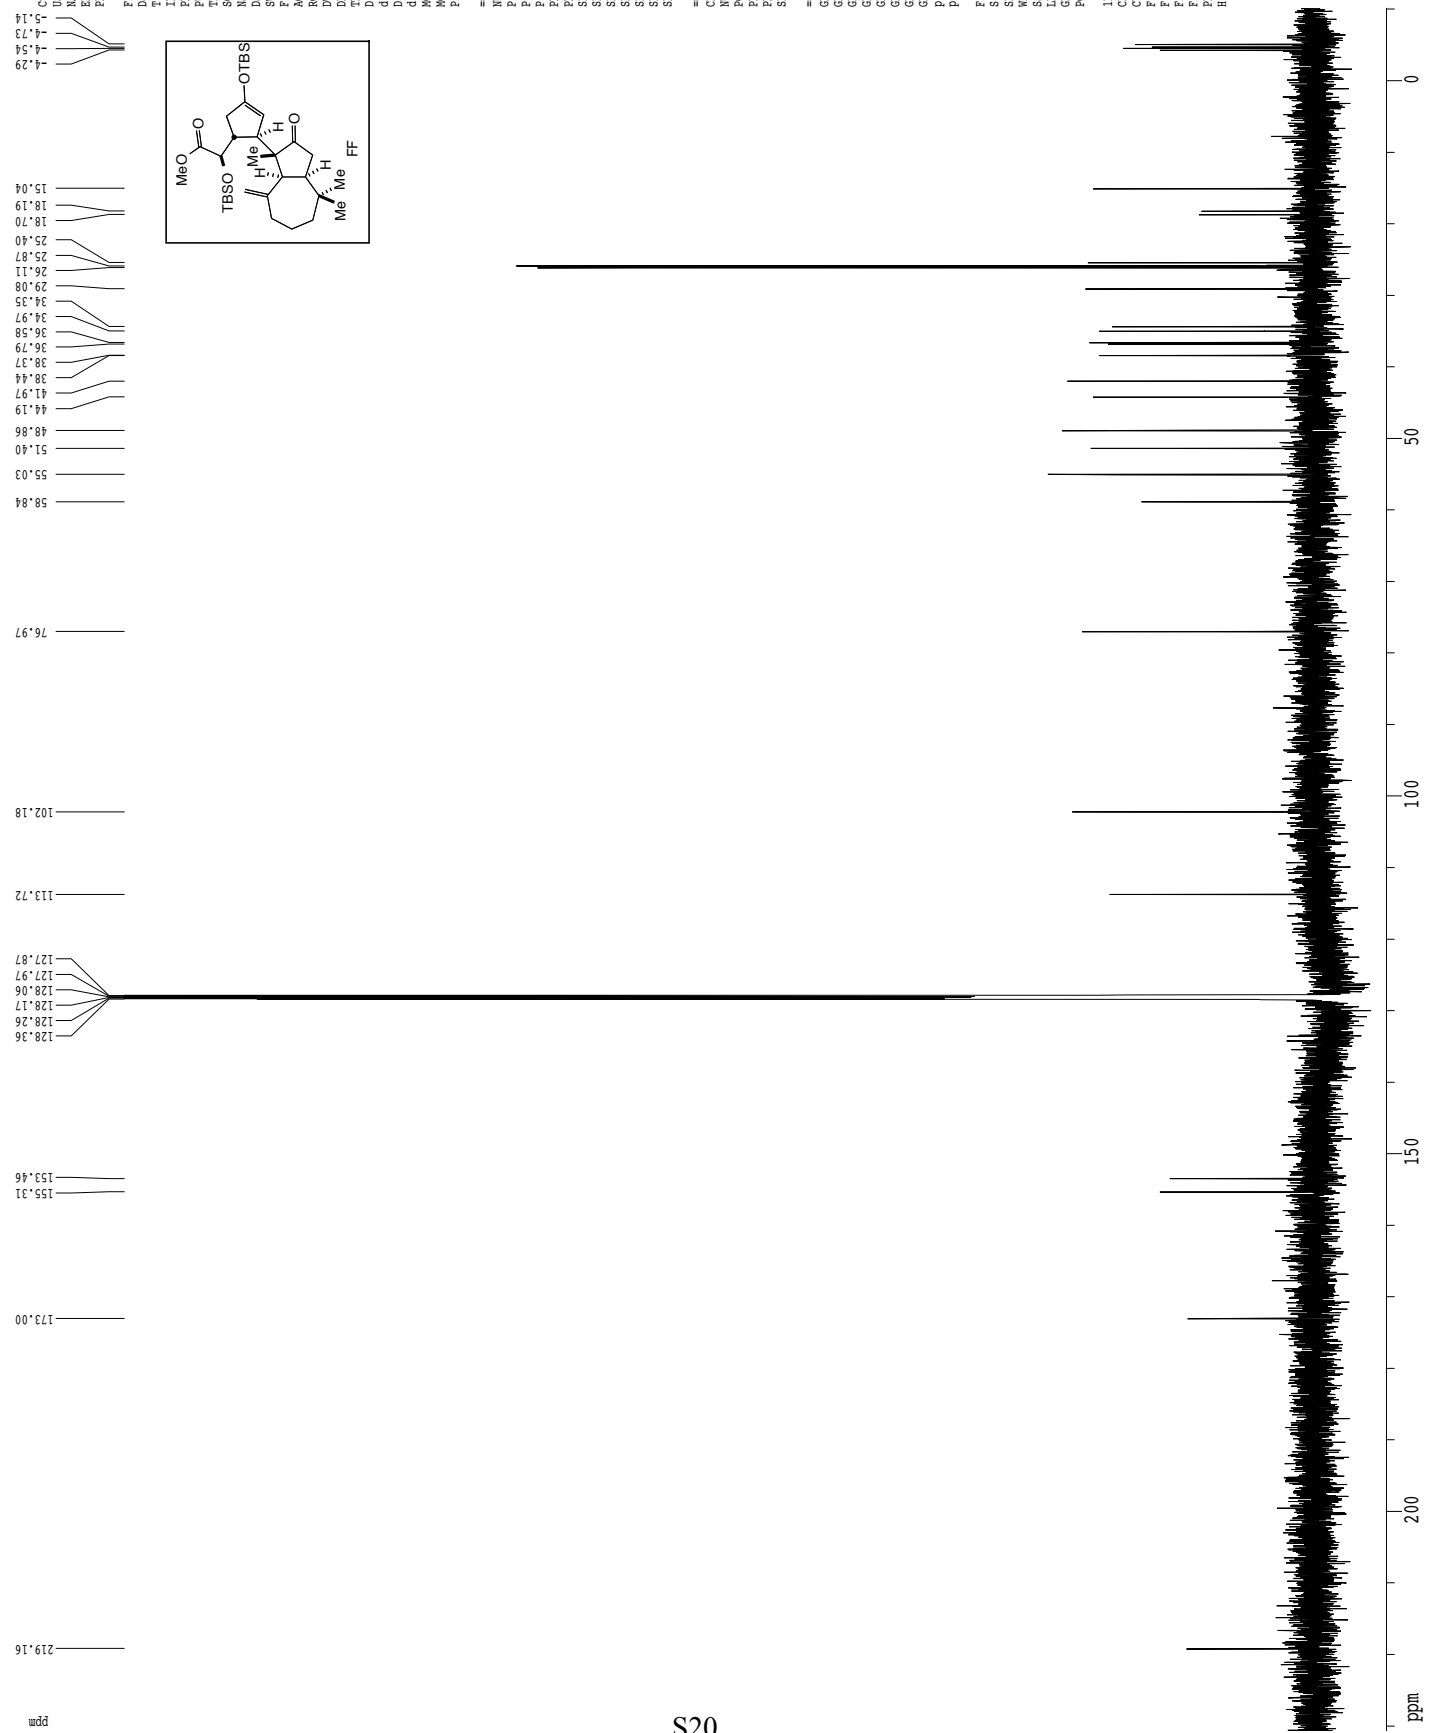

Current Data Parameters  
 USER Scimer  
 EXPNO 1  
 PROCNO 1  
 F2 - Acquisition Parameters  
 Date\_ 20110427  
 Time 11:48  
 INSTRUM cryo500  
 PROBRID 5 mm CPAC1 JH  
 PULPROG zgpg30  
 TD 65536  
 SOLVENT CDCl3  
 NS 141  
 DS 16  
 SWH 30303.031 Hz  
 FIDRES 0.462388 Hz  
 AQ 1.0815940 sec  
 RG 2048  
 DR 6.00 usec  
 DE 6.00 usec  
 TE 298.2 K  
 D1 0.25000000 sec  
 d11 0.03000000 sec  
 D16 0.00020000 sec  
 d17 0.00015600 sec  
 ACQRESF 0.00000000 sec  
 ACQBRK 0.01500000 sec  
 F2 31.00 usec

===== CHANNEL F1 =====  
 NUC1 <sup>13</sup>C  
 P1 15.50 usec  
 P11 500.00 usec  
 P12 2000.00 usec  
 PL0 120.00 dB  
 PL1 125.794548 dB  
 SP1 5.20 dB  
 SP2 31.20 dB  
 SFO1 125.761462 MHz  
 SFO2 500.2225011 MHz  
 SFNAM1 Cpp60.0.5.20.1  
 SFNAM2 Cpp60comp.4  
 SFOFF1 0.00 Hz  
 SFOFF2 0.00 Hz

===== CHANNEL F2 =====  
 CPDPRG2 waltz16  
 NUC2 <sup>1</sup>H  
 PCPD2 100.00 usec  
 PL2 1.60 dB  
 PL12 24.60 dB  
 SFO2 500.2225011 MHz  
 ===== GRADIENT CHANNEL =====  
 GSPR1 100.00 MHz  
 GSPR2 5150.10 MHz  
 GFL1 0.00 %  
 GFL2 0.00 %  
 GFL3 0.00 %  
 GFL4 0.00 %  
 GFL5 30.00 %  
 GFL6 50.00 %  
 GFL7 500.00 usec  
 GFL8 1000.00 usec

F2 - Processing parameters  
 SI 65536  
 SF 125.7803747 MHz  
 WDW EM  
 SSB 0  
 LB 1.00 Hz  
 GB 0  
 PC 2.00

ID NMR plot parameters  
 CX 22.80 cm  
 CY 200.00 cm  
 FIP 230.637 ppm  
 F1 29009.67 Hz  
 F2 -10.287 ppm  
 F3 -1293.96 Hz  
 F4 14.568 ppm/cm  
 HECK 1329.1057 Hz/cm

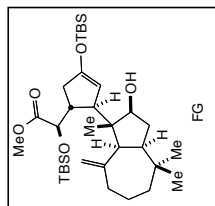

Current Data Parameters  
 USER schner  
 NAME mjs4-78-3c13  
 EXPNO 1  
 PROCNO 1  
 F2 - Acquisition Parameters  
 Date\_ 20110512  
 Time 15.45  
 INSTRUM cryo500  
 PROBHD 5 mm CPXI 1H-  
 PULPROG zg30  
 TD 81728  
 SOLVENT C6D6  
 NS 5  
 DS 2  
 SWH 8012.820 Hz  
 FIDRES 0.098043 Hz  
 AQ 5.0999398 sec  
 RG 4  
 ACQ 62.40 usec  
 DE 6.00 usec  
 TE 288.0 K  
 D1 0.10000000 sec  
 MCREST 0.00000000 sec  
 MCWRR 0.01500000 sec  
 ===== CHANNEL f1 =====  
 NUC1 1H  
 P1 7.50 usec  
 PL1 1.00 dB  
 SFO1 500.2235015 MHz  
 F2 - Processing parameters  
 SI 32768  
 SF 500.2200312 MHz  
 DS 4  
 WDW EM  
 SSB 0  
 LB 0.30 Hz  
 GB 0  
 PC 1.00  
 ID NMR plot parameters  
 CX 22.80 cm  
 CY 15.00 cm  
 FIP 7.627 ppm  
 F2 3815.39 Hz  
 F3 -63.76 ppm  
 F4 -63.76 ppm  
 PRMCM 0.34006 ppm/cm  
 HZCM 170.10709 Hz/cm

<sup>1</sup>H spectrum

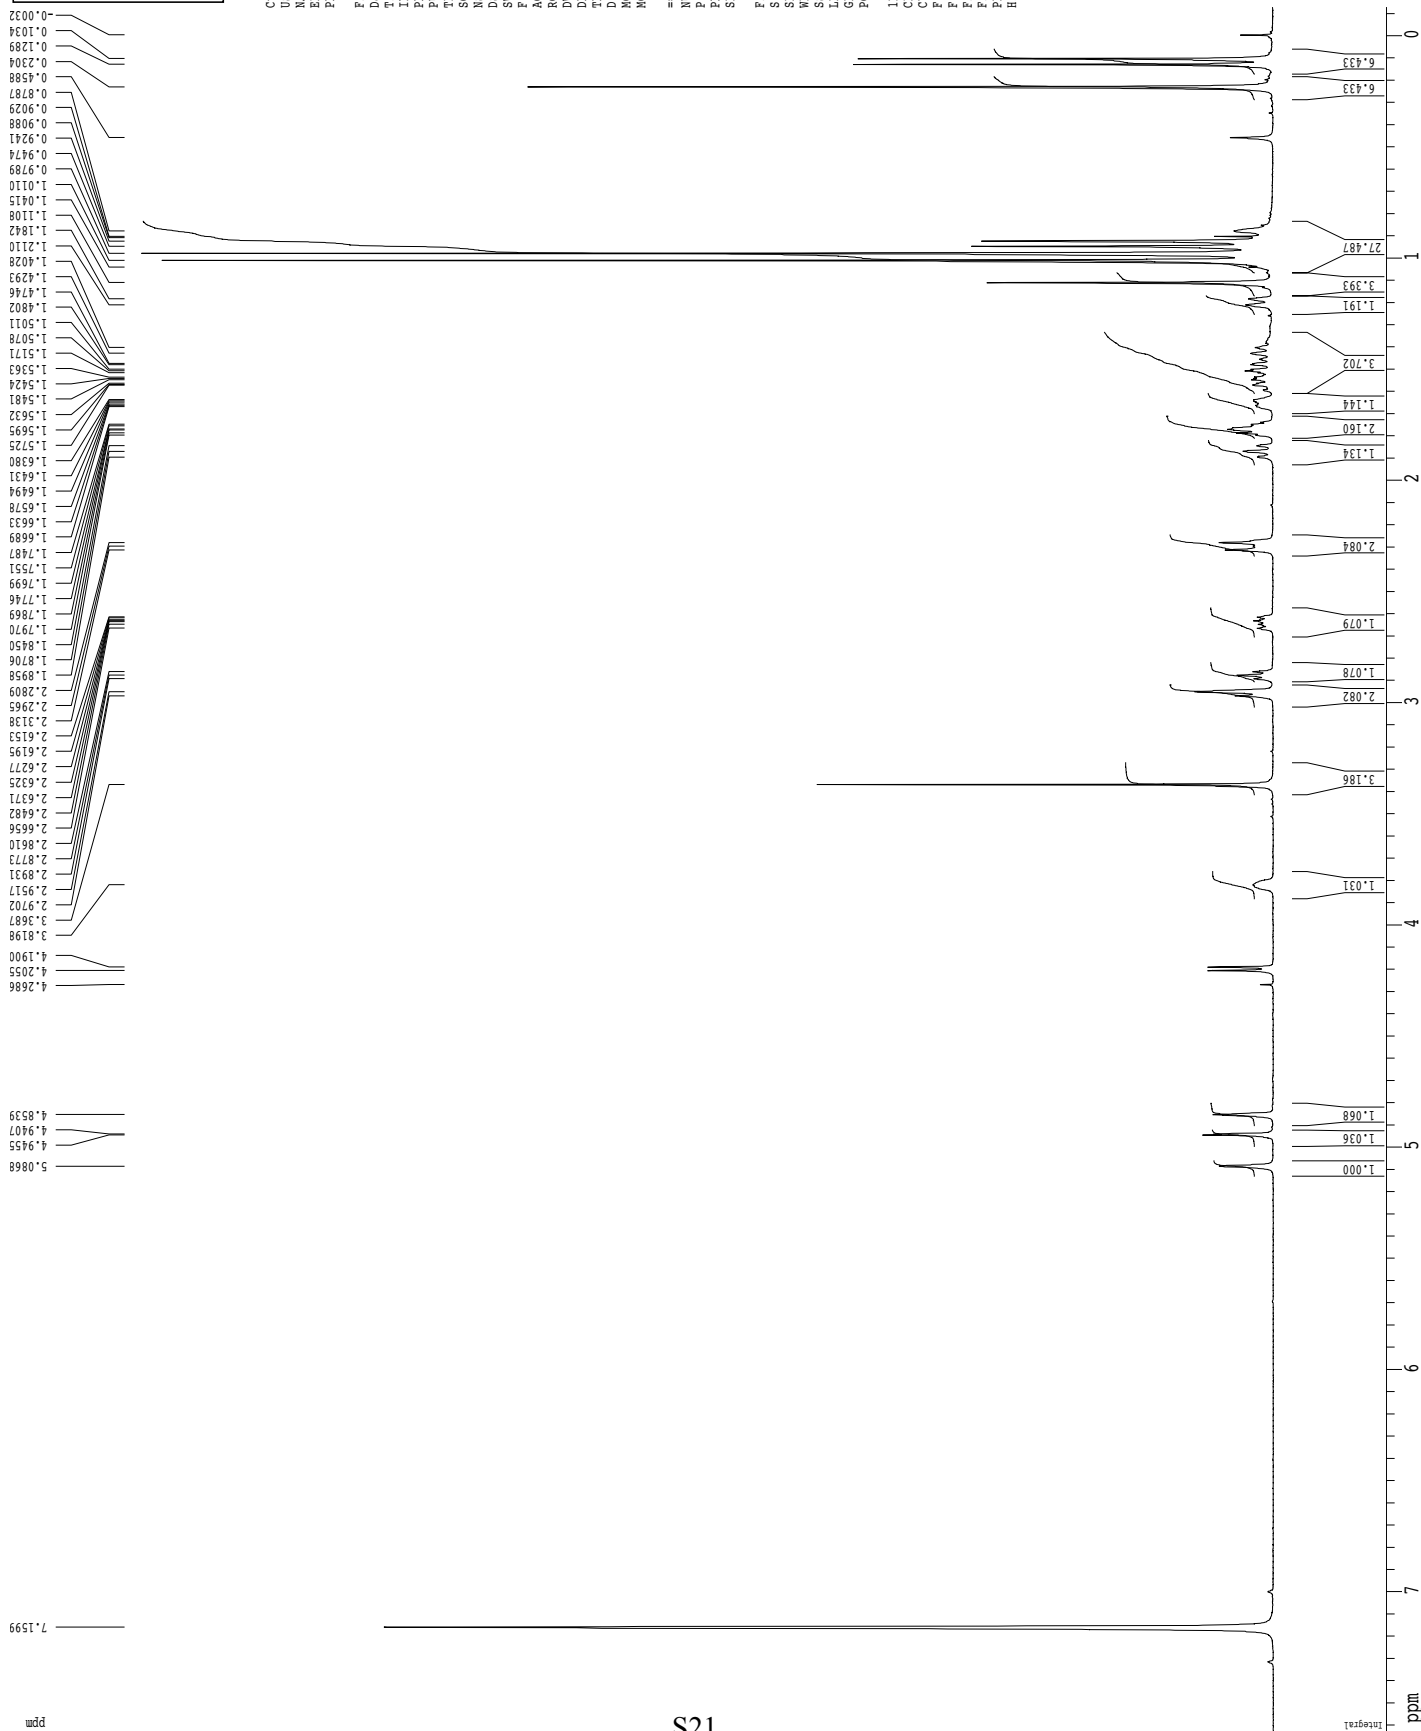

Z-restored spin-echo <sup>13</sup>C spectrum with <sup>1</sup>H decoupling

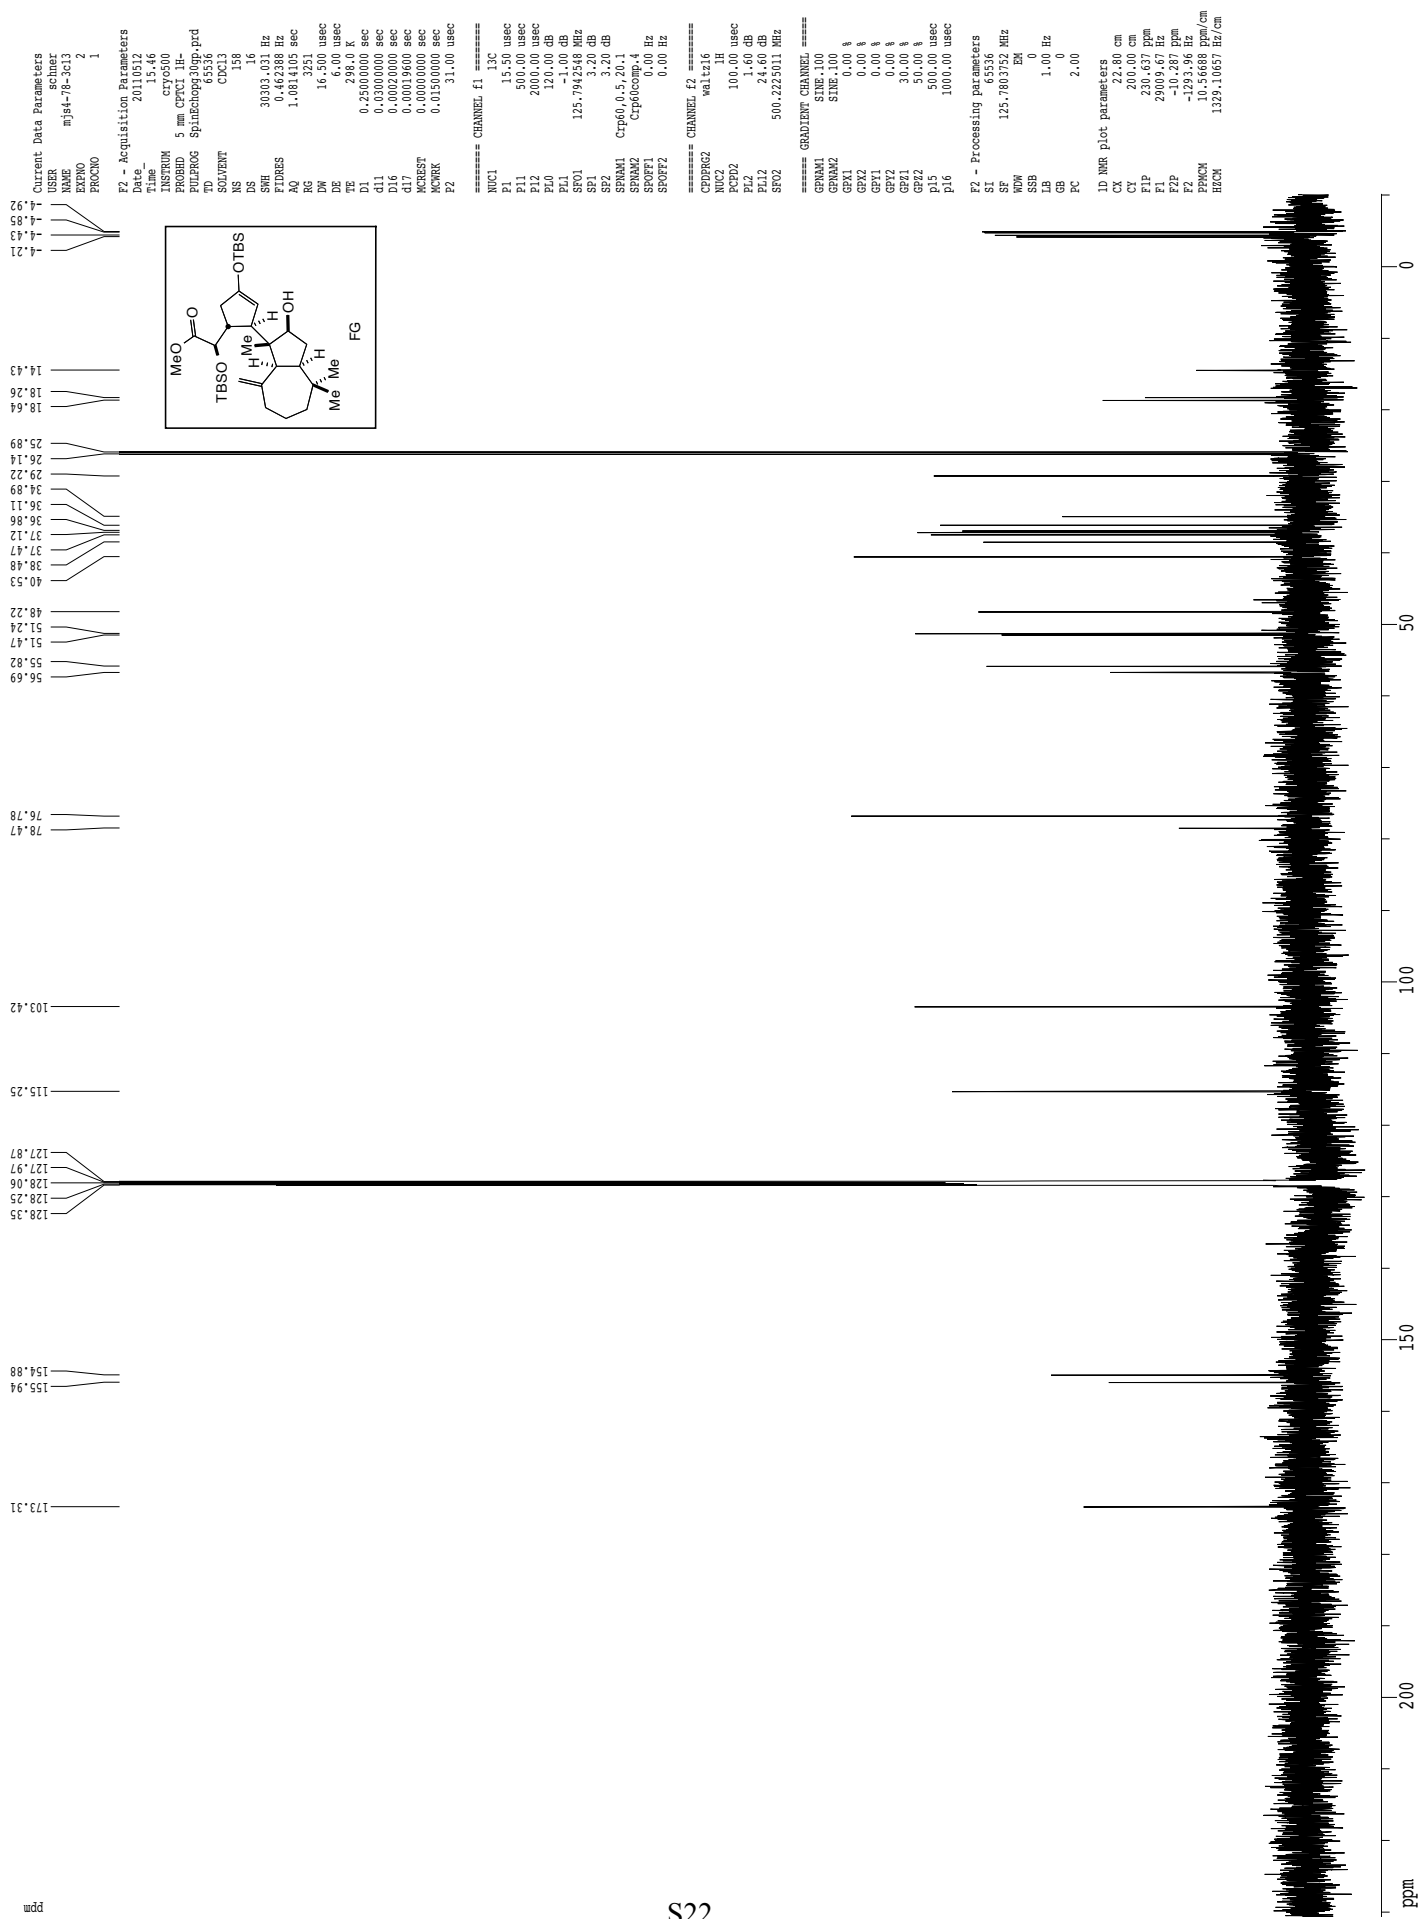

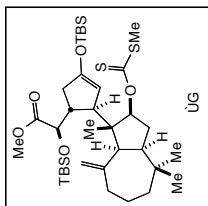

Current Data Parameters  
 USER schner  
 NAME #J54-62-3  
 EXPNO 1  
 PROCNO 1

F2 - Acquisition Parameters  
 Date\_ 20110904  
 Time 11.38  
 INSTRUM cryo500  
 PROBRD 5 mm CPYCI 1H-  
 PULPROG zg30  
 TD 81728  
 SOLVENT CDCl3  
 NS 8  
 DS 2  
 SWH 8012.820 Hz  
 FIDRES 0.098043 Hz  
 AQ 5.099074 sec  
 RG 32  
 DW 6.00 usec  
 DE 6.00 usec  
 TE 288.0 K  
 D1 0.1000000 sec  
 MCREST 0.0000000 sec  
 MCWRR 0.0150000 sec

==== CHANNEL f1 =====  
 NUC1 1H  
 P1 7.50 usec  
 PL1 1.00 dB  
 SFO1 500.2235015 MHz

F2 - Processing parameters  
 SI 65536  
 SF 500.2205558 MHz  
 MDW EM  
 SSB 0  
 LB 0.30 Hz  
 GB 0  
 PC 0.25

1D NMR plot parameters  
 CX 22.80 cm  
 CY 15.00 cm  
 FIP 9.000 ppm  
 F2 4501.98 Hz  
 F3 -250.31 ppm  
 F4 0.0000000 Hz  
 PRGM 0.41667 ppm/cm  
 HZCN 208.42593 Hz/cm

<sup>1</sup>H spectrum

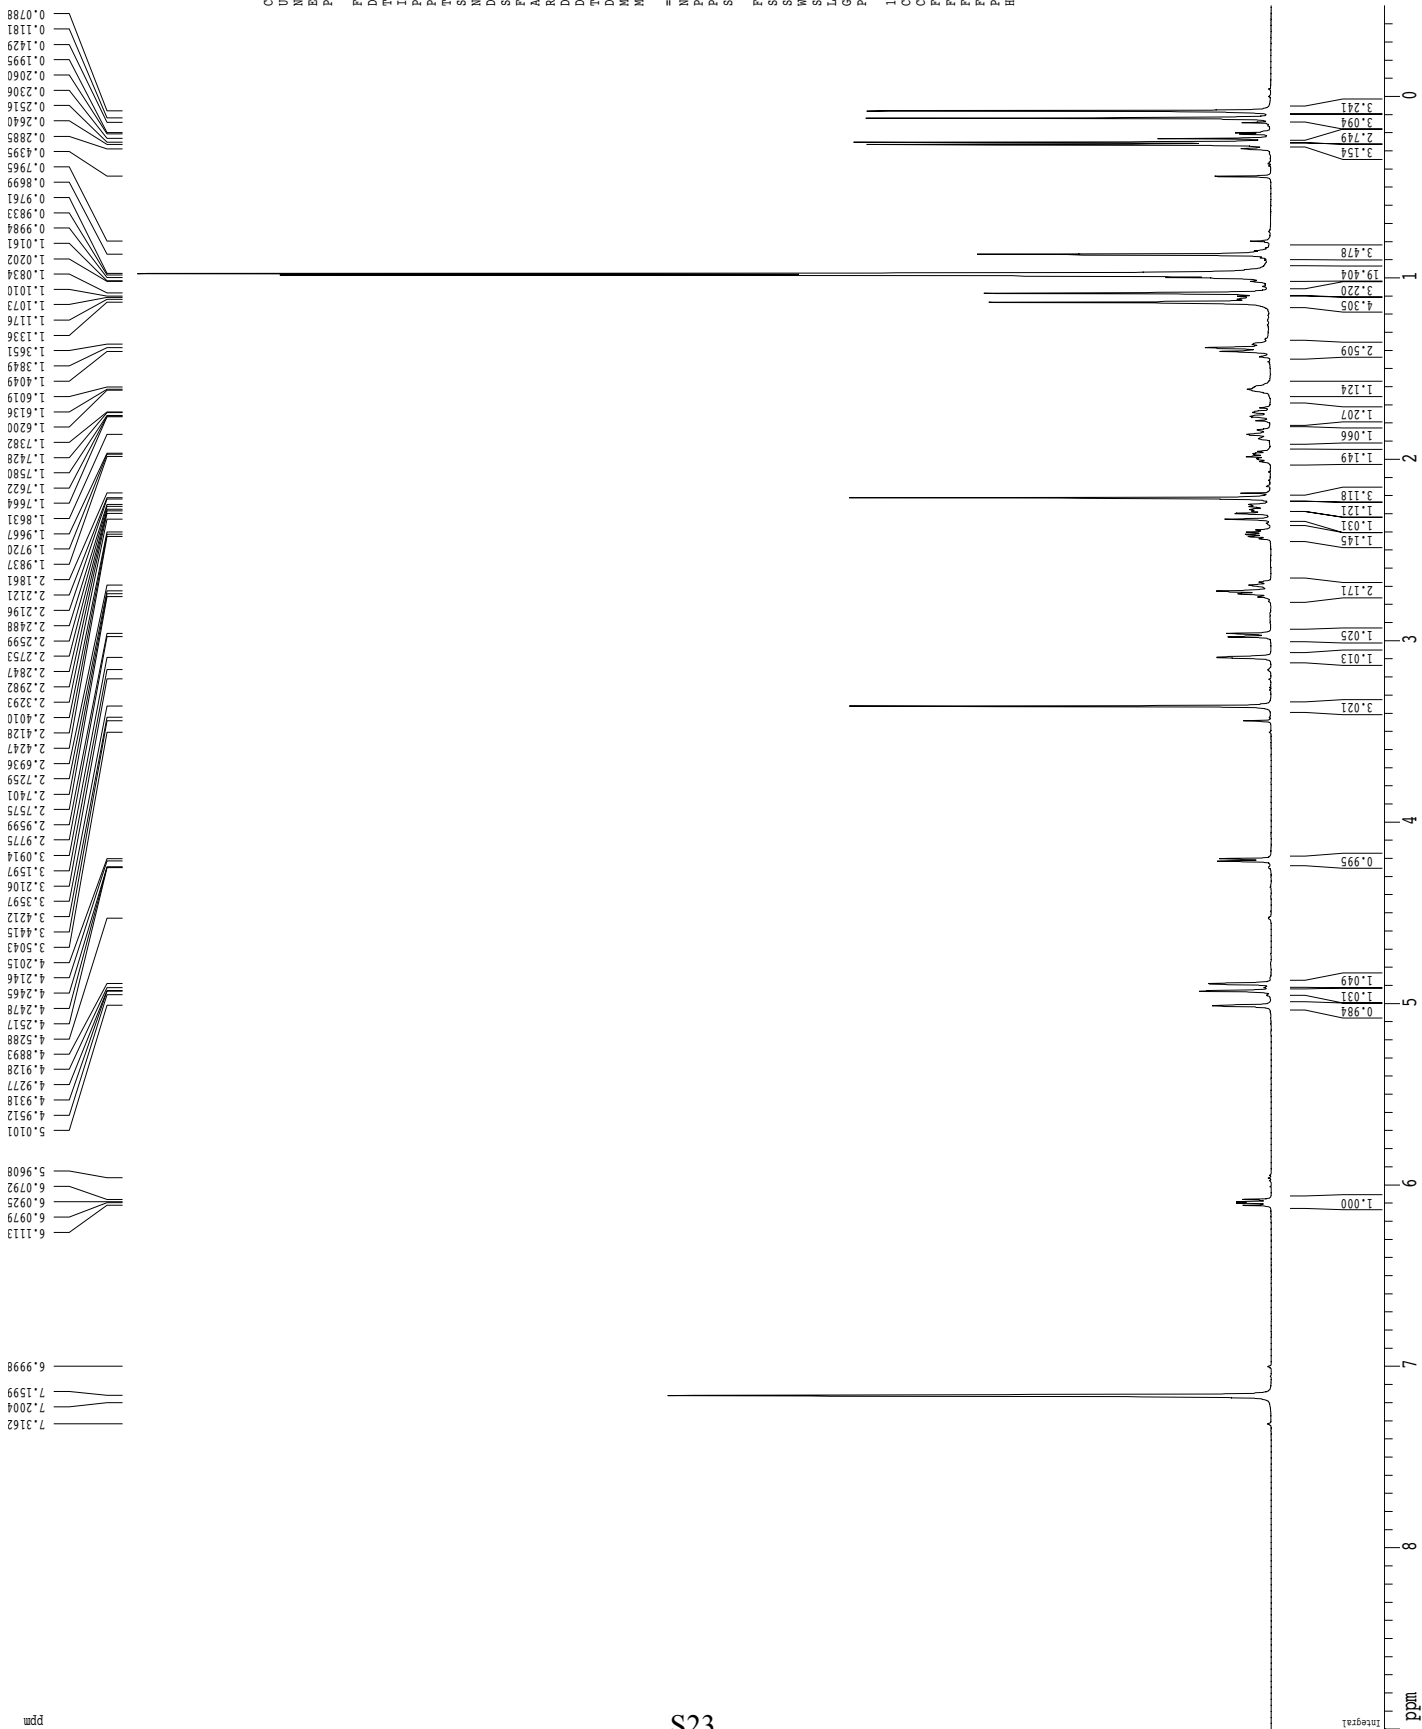

Z-restored spin-echo <sup>13</sup>C spectrum with <sup>1</sup>H decoupling

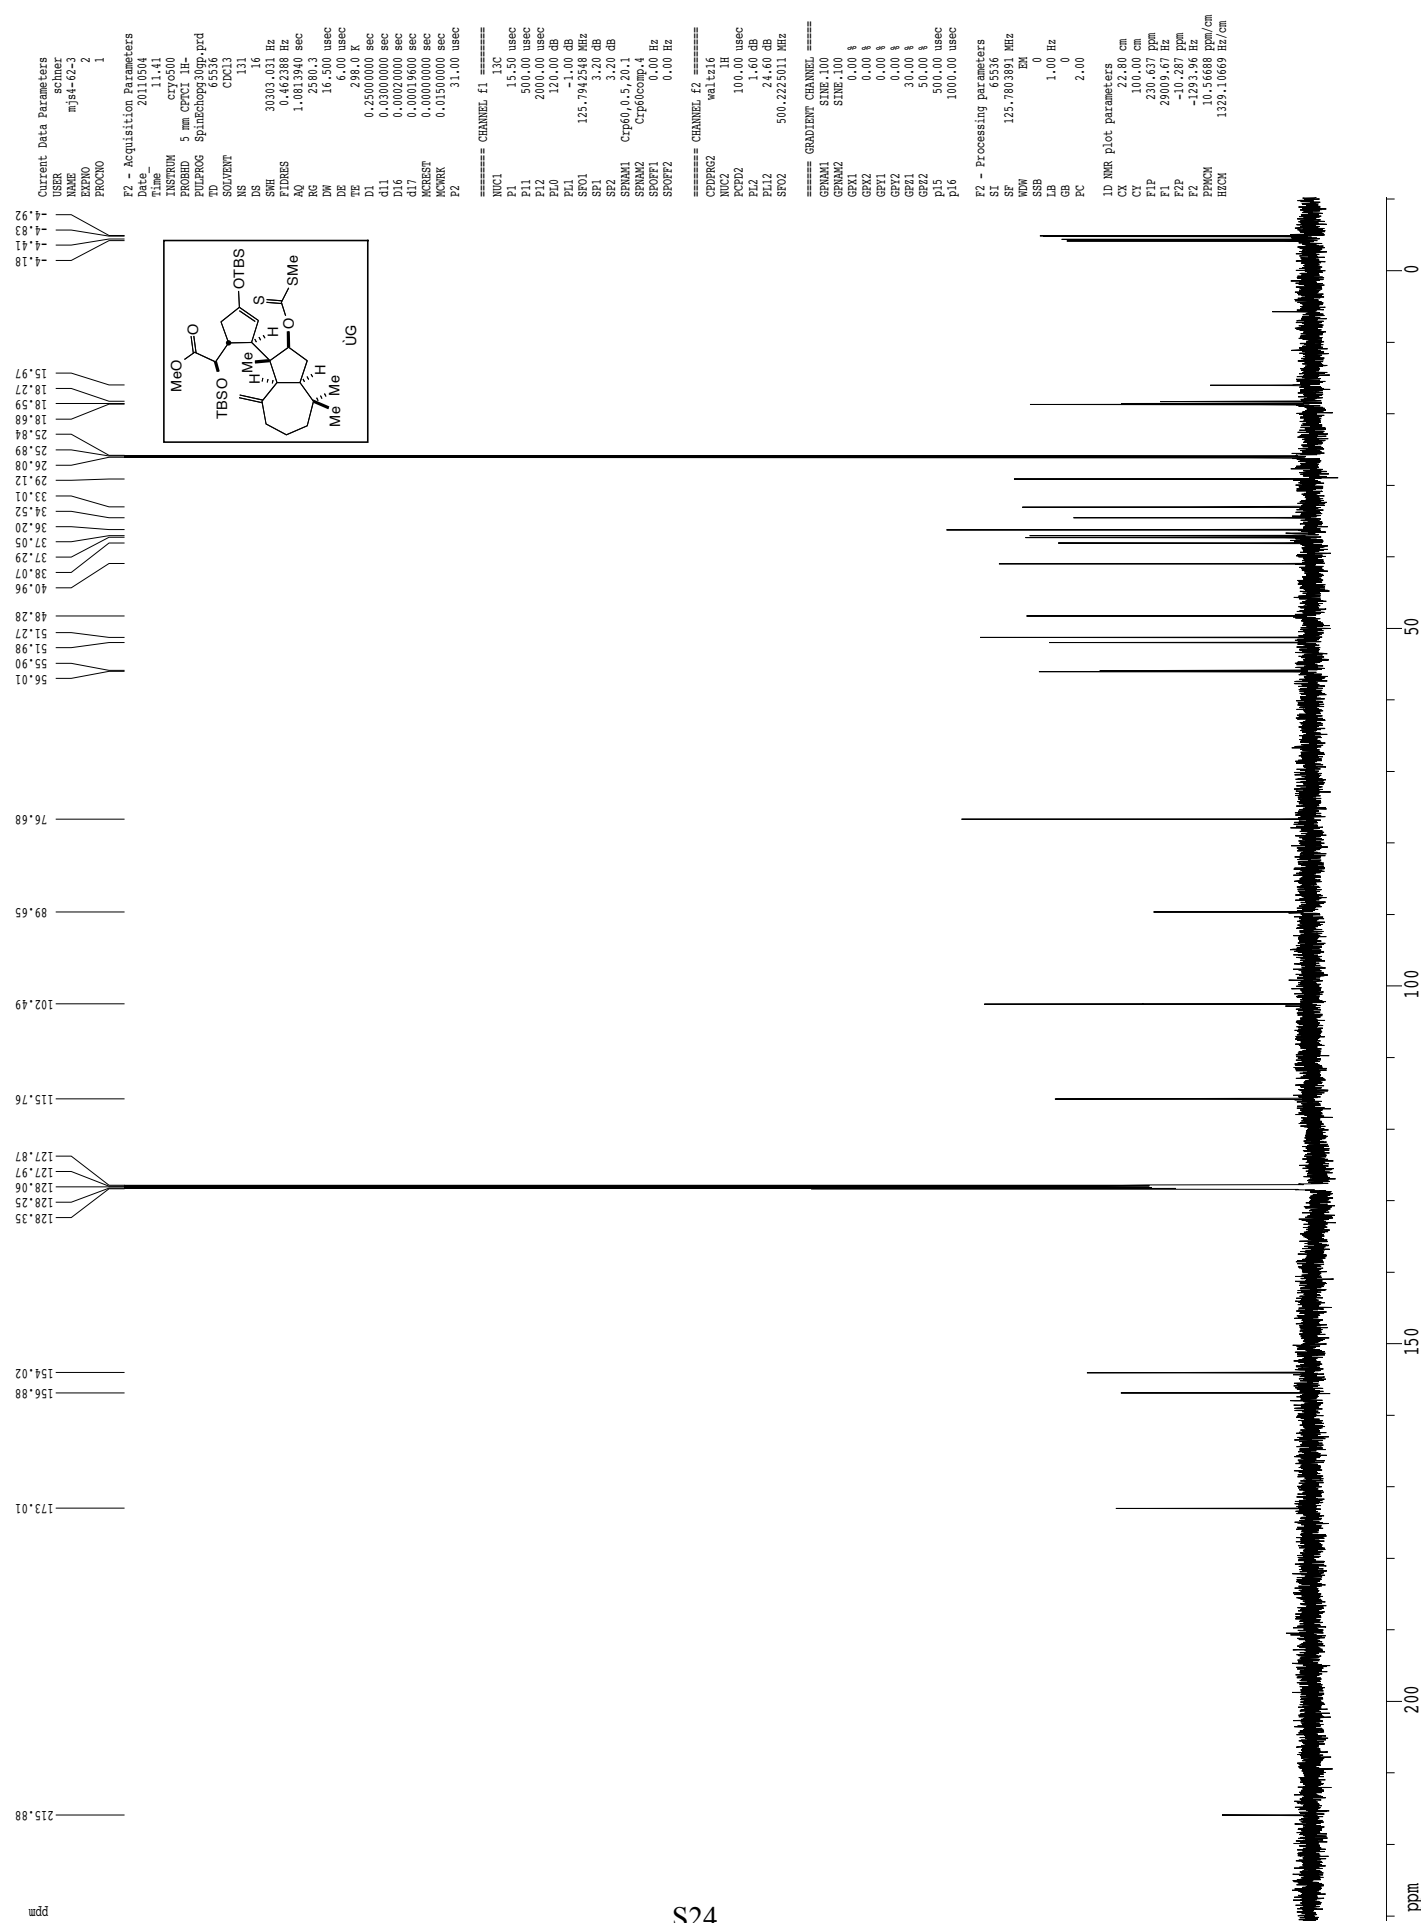



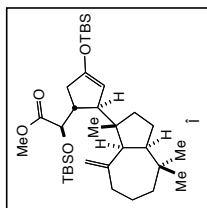

Current Data Parameters  
 USER schner  
 NAME mjs4-80-3c13  
 EXPNO 1  
 PROCNO 1

F2 - Acquisition Parameters  
 Date\_ 20110517  
 Time 8.01  
 INSTRUM cryo500  
 PROBHD 5 mm CPXI 1H-  
 PULPROG zg30  
 TD 81728  
 SOLVENT CDCl3  
 NS 8  
 DS 2

SWH 8012.820 Hz  
 FIDRES 0.098043 Hz  
 AQ 5.0999398 sec  
 RG 71.8  
 DE 6.00 usec  
 TE 288.0 K  
 D1 0.10000000 sec  
 MCREST 0.00000000 sec  
 MCWRR 0.01500000 sec

==== CHANNEL f1 =====  
 NUC1 1H  
 P1 7.50 usec  
 PL1 1.00 dB  
 SFO1 500.2235015 MHz

F2 - Processing parameters  
 S2 65536  
 SF 500.220563 MHz  
 MDW EM  
 SSB 0  
 LB 0.30 Hz  
 GB 0  
 PC 4.00

1D NMR plot parameters  
 CX 22.80 cm  
 CY 15.00 cm  
 FIP 7.773 ppm  
 F2 3986.22 Hz  
 F2 9.91 ppm  
 F2 0.34179 ppm/cm  
 HZCN 170.97058 Hz/cm

<sup>1</sup>H spectrum

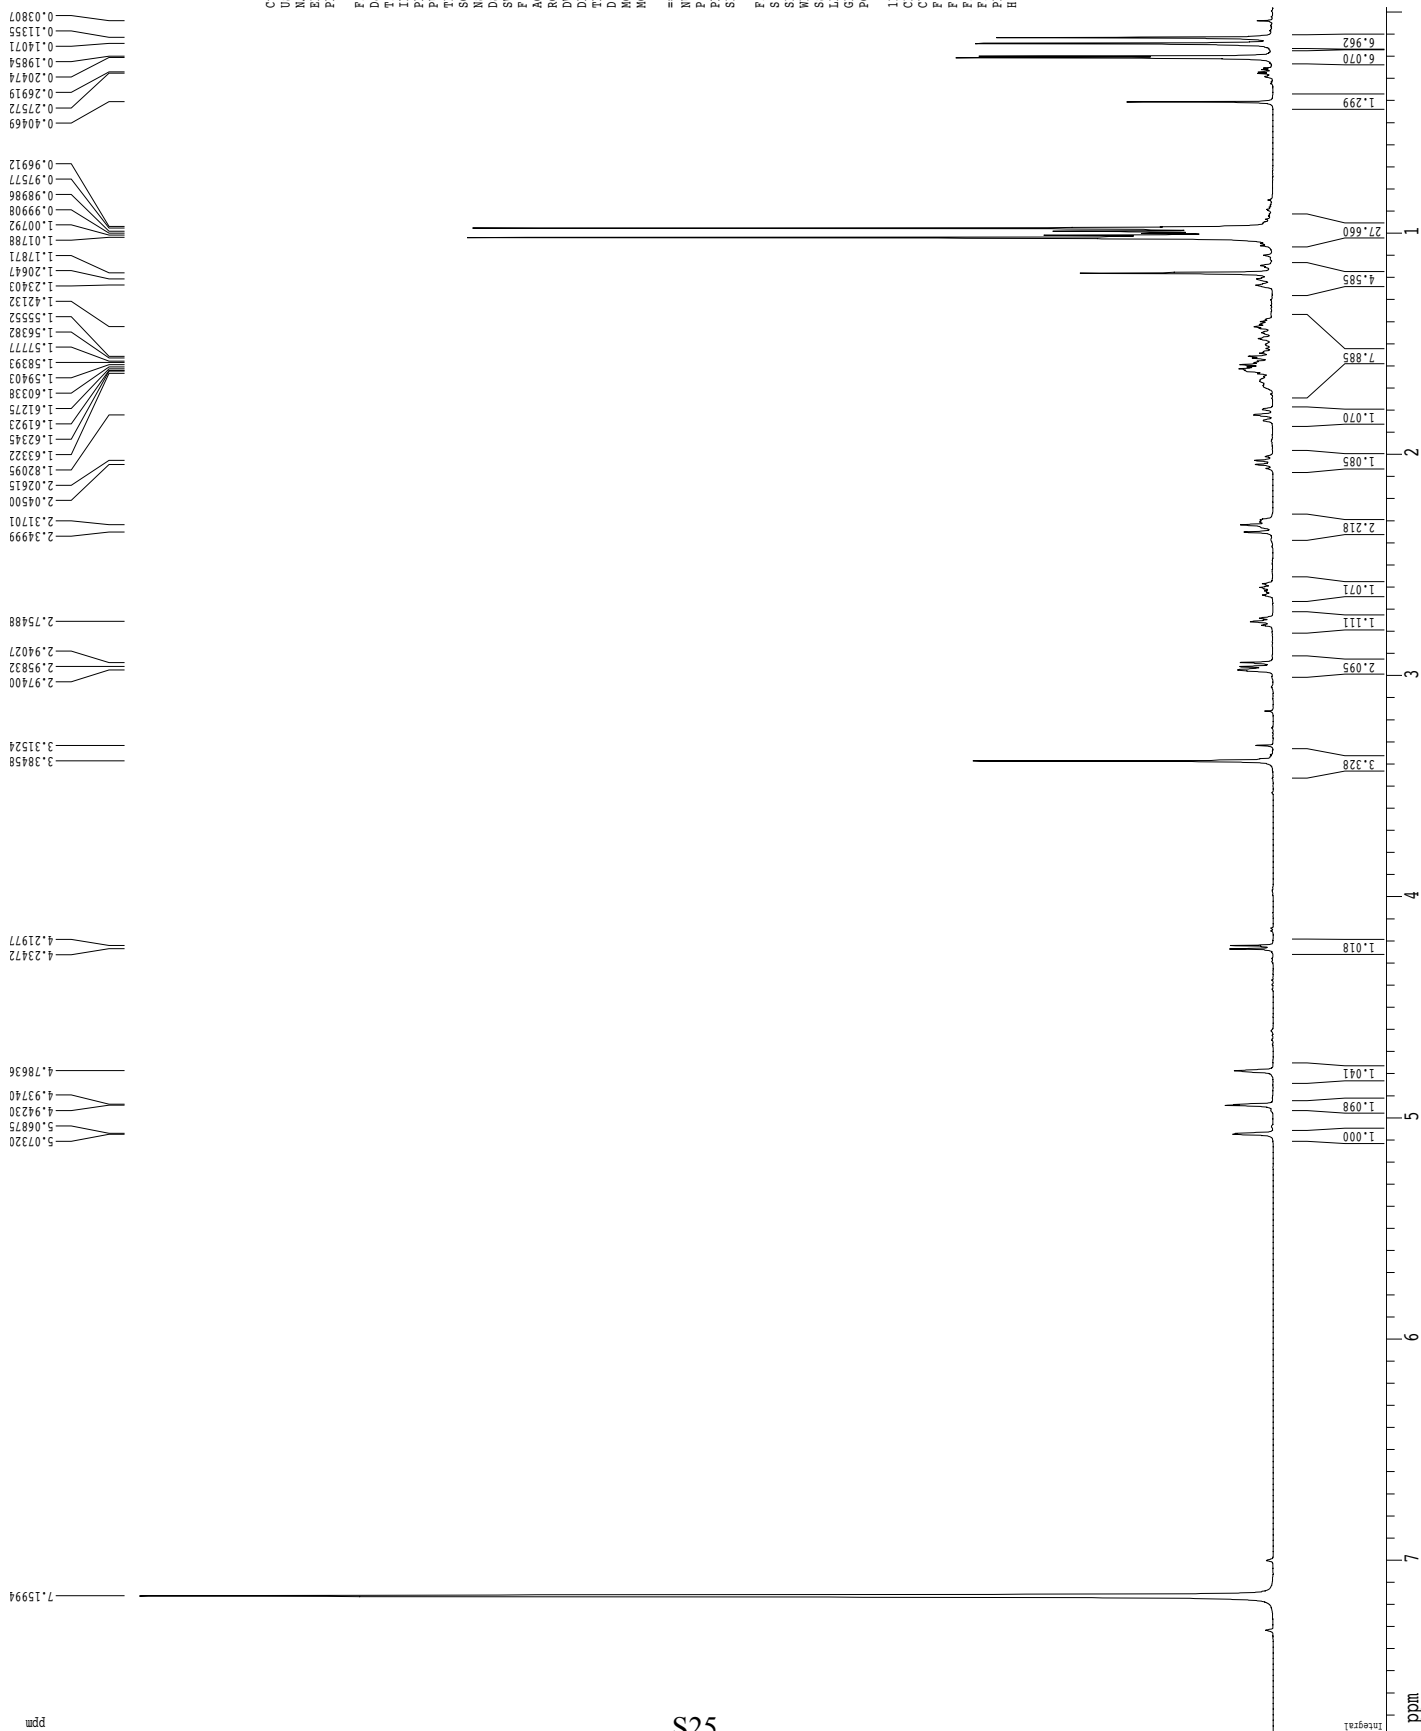

Z-restored spin-echo <sup>13</sup>C spectrum with <sup>1</sup>H decoupling

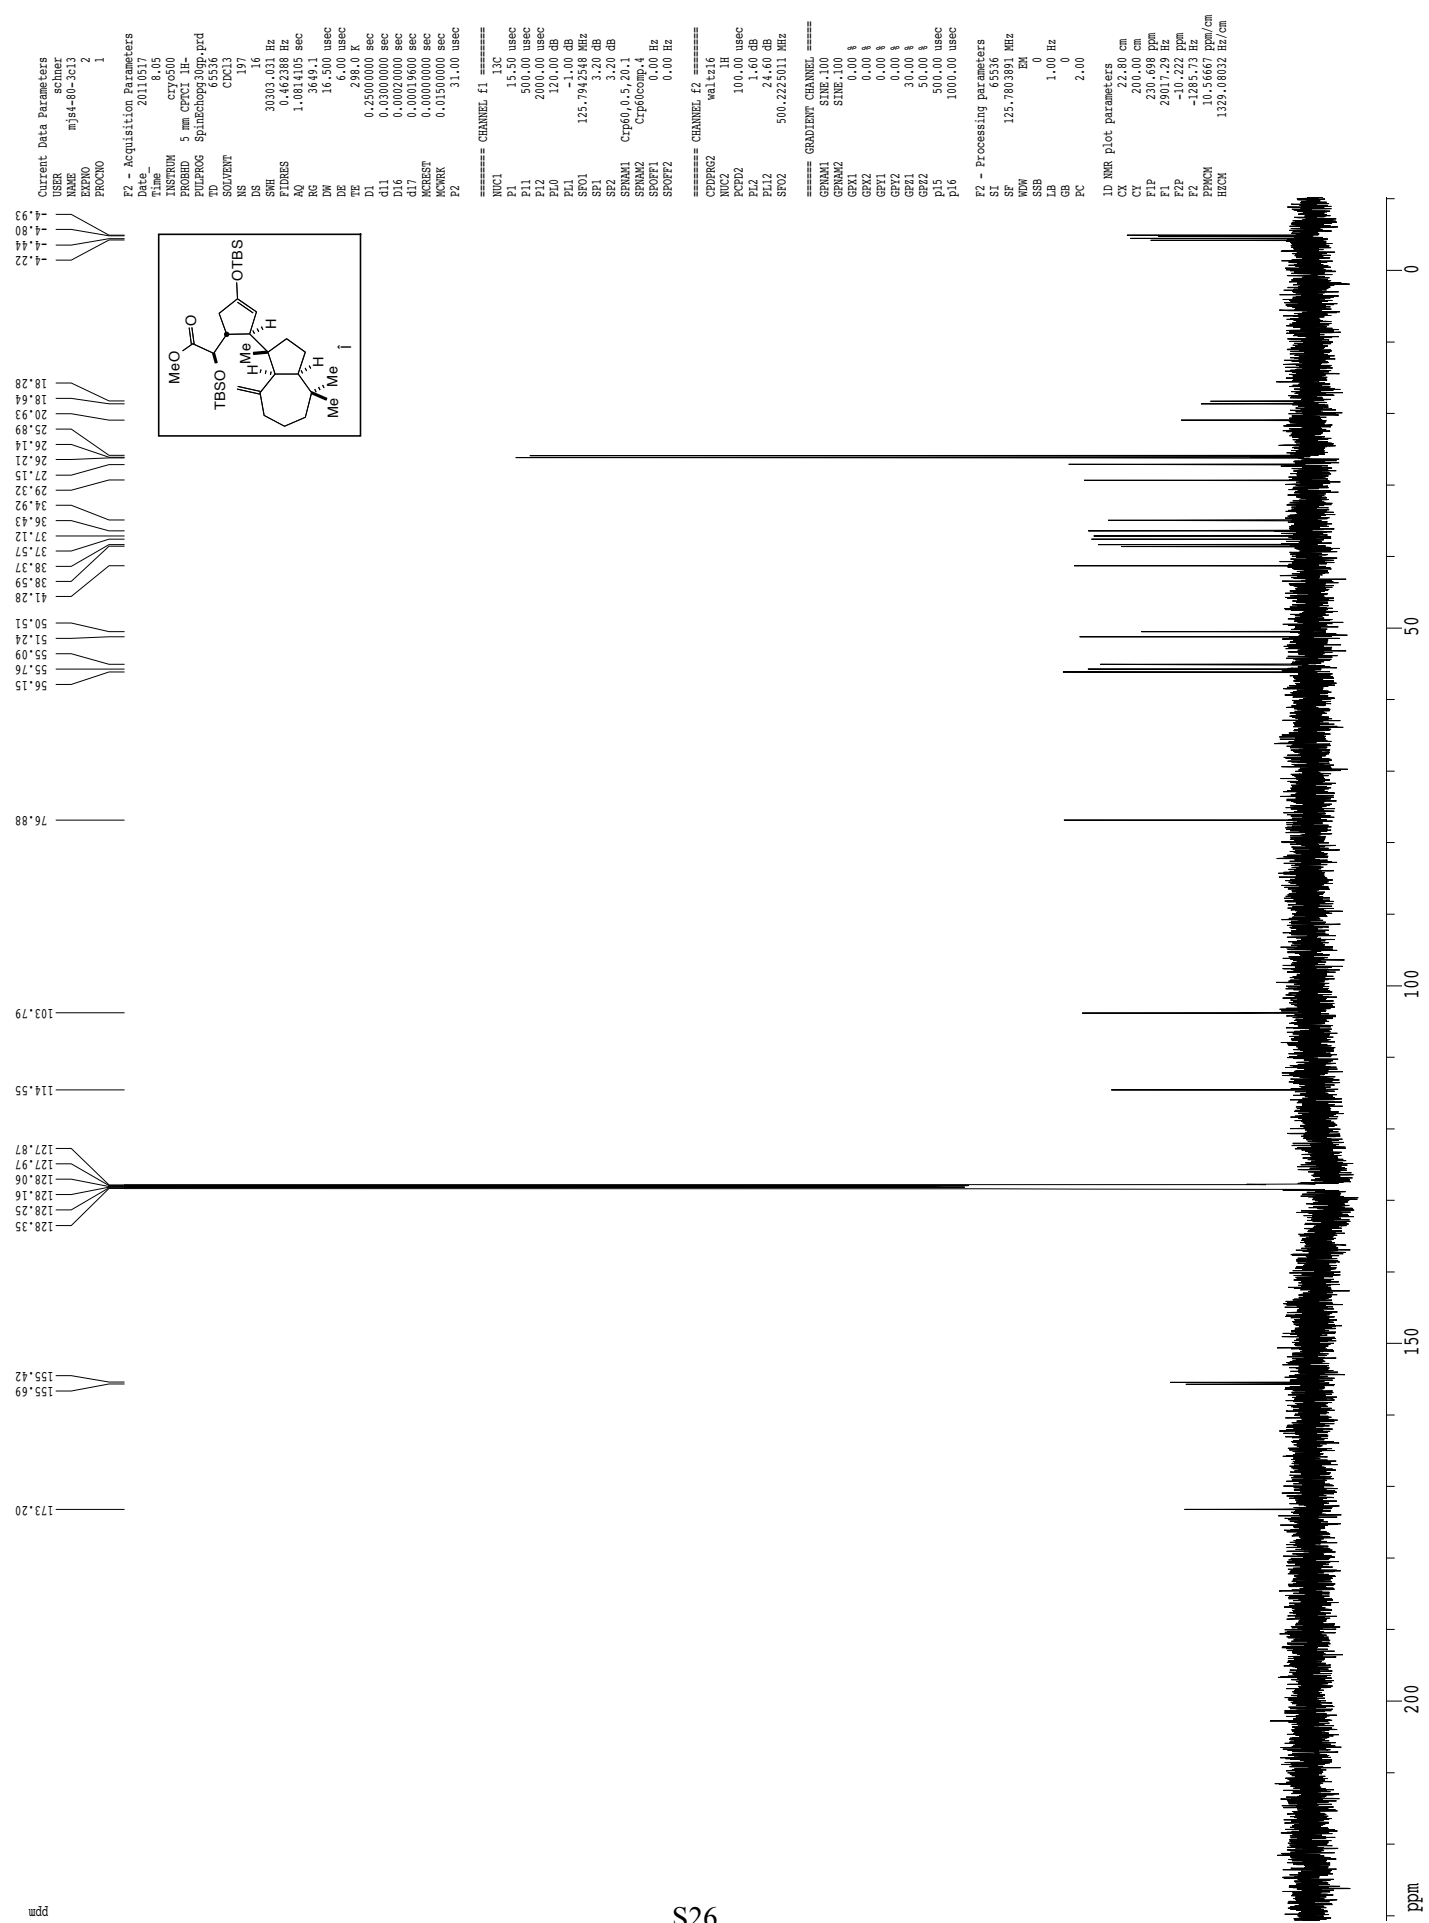

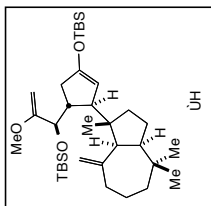

Current Data Parameters  
 USER schner  
 NAME #J84-81-3  
 EXPNO 1  
 PROCNO 1

F2 - Acquisition Parameters  
 Date\_ 20110517  
 Time 13.20  
 INSTRUM cryo500  
 PROBRD 5 mm CPYCI 1H-  
 PULPROG zg30  
 TD 81728  
 SOLVENT CDCl3  
 NS 15  
 DS 2  
 SWH 801.2820 Hz  
 FIDRES 0.098043 Hz  
 AQ 5.0959398 sec  
 RG 4  
 DR 62.40 usec  
 DE 6.00 usec  
 TE 288.0 K  
 D1 0.10000000 sec  
 MCREST 0.00000000 sec  
 MCWRR 0.01500000 sec

==== CHANNEL f1 =====  
 NUC1 1H  
 P1 7.50 usec  
 PL1 1.60 dB  
 SFO1 500.225015 MHz

F2 - Processing parameters  
 SI 32768  
 SF 500.2200560 MHz  
 DS 4  
 WDW EM  
 SSB 0  
 LB 0.30 Hz  
 GB 0  
 PC 4.00

1D NMR plot parameters  
 CX 22.80 cm  
 CY 40.00 cm  
 FIP 7.488 ppm  
 F1 3150.65 Hz  
 F2 -295.53 ppm  
 F3 0.00000000 Hz  
 FPMCM 0.35474 ppm/cm  
 HZCM 177.44673 Hz/cm

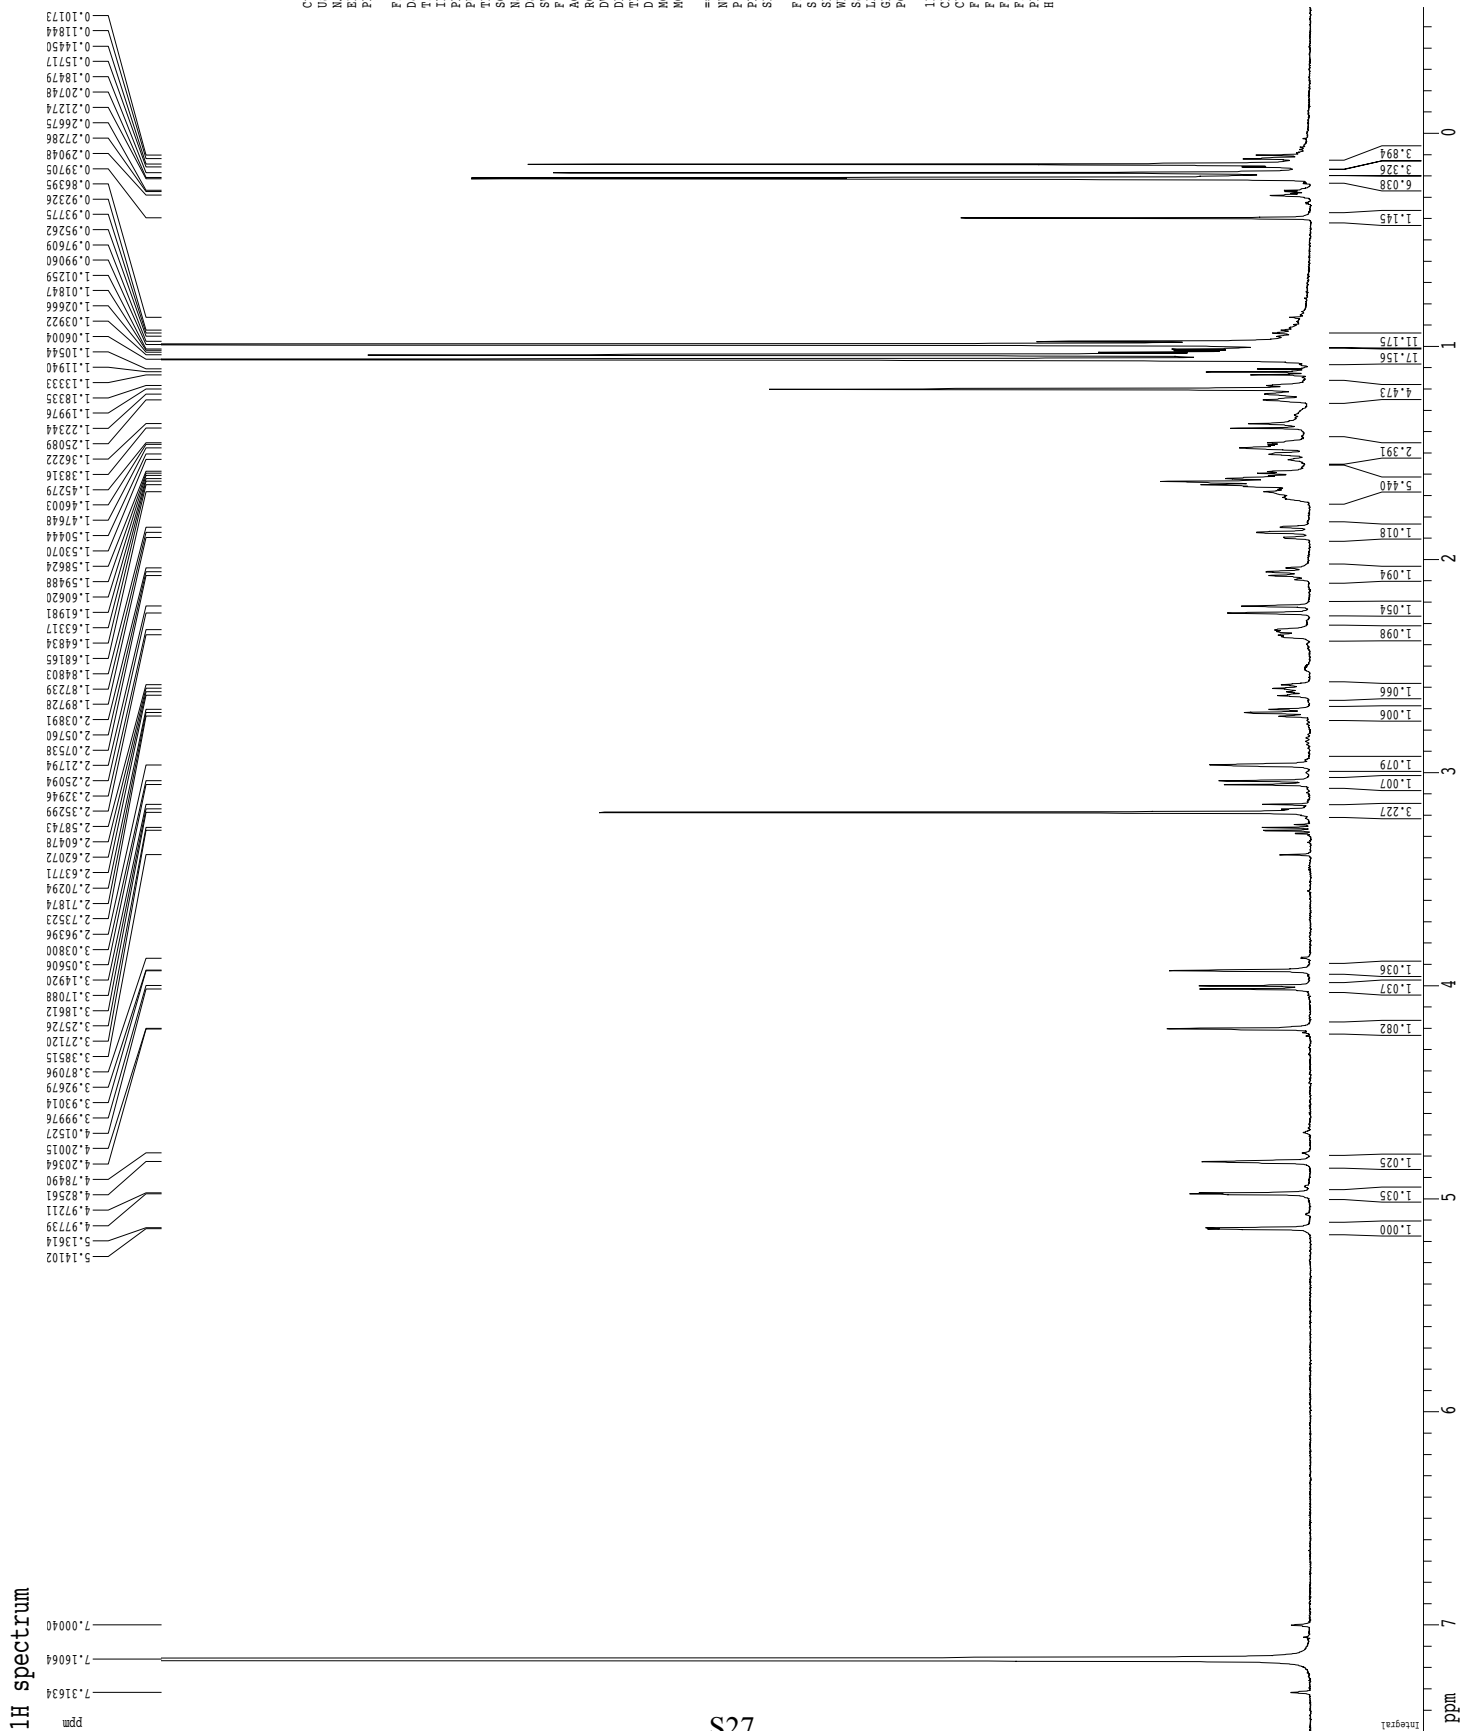

Z-restored spin-echo <sup>13</sup>C spectrum with <sup>1</sup>H decoupling

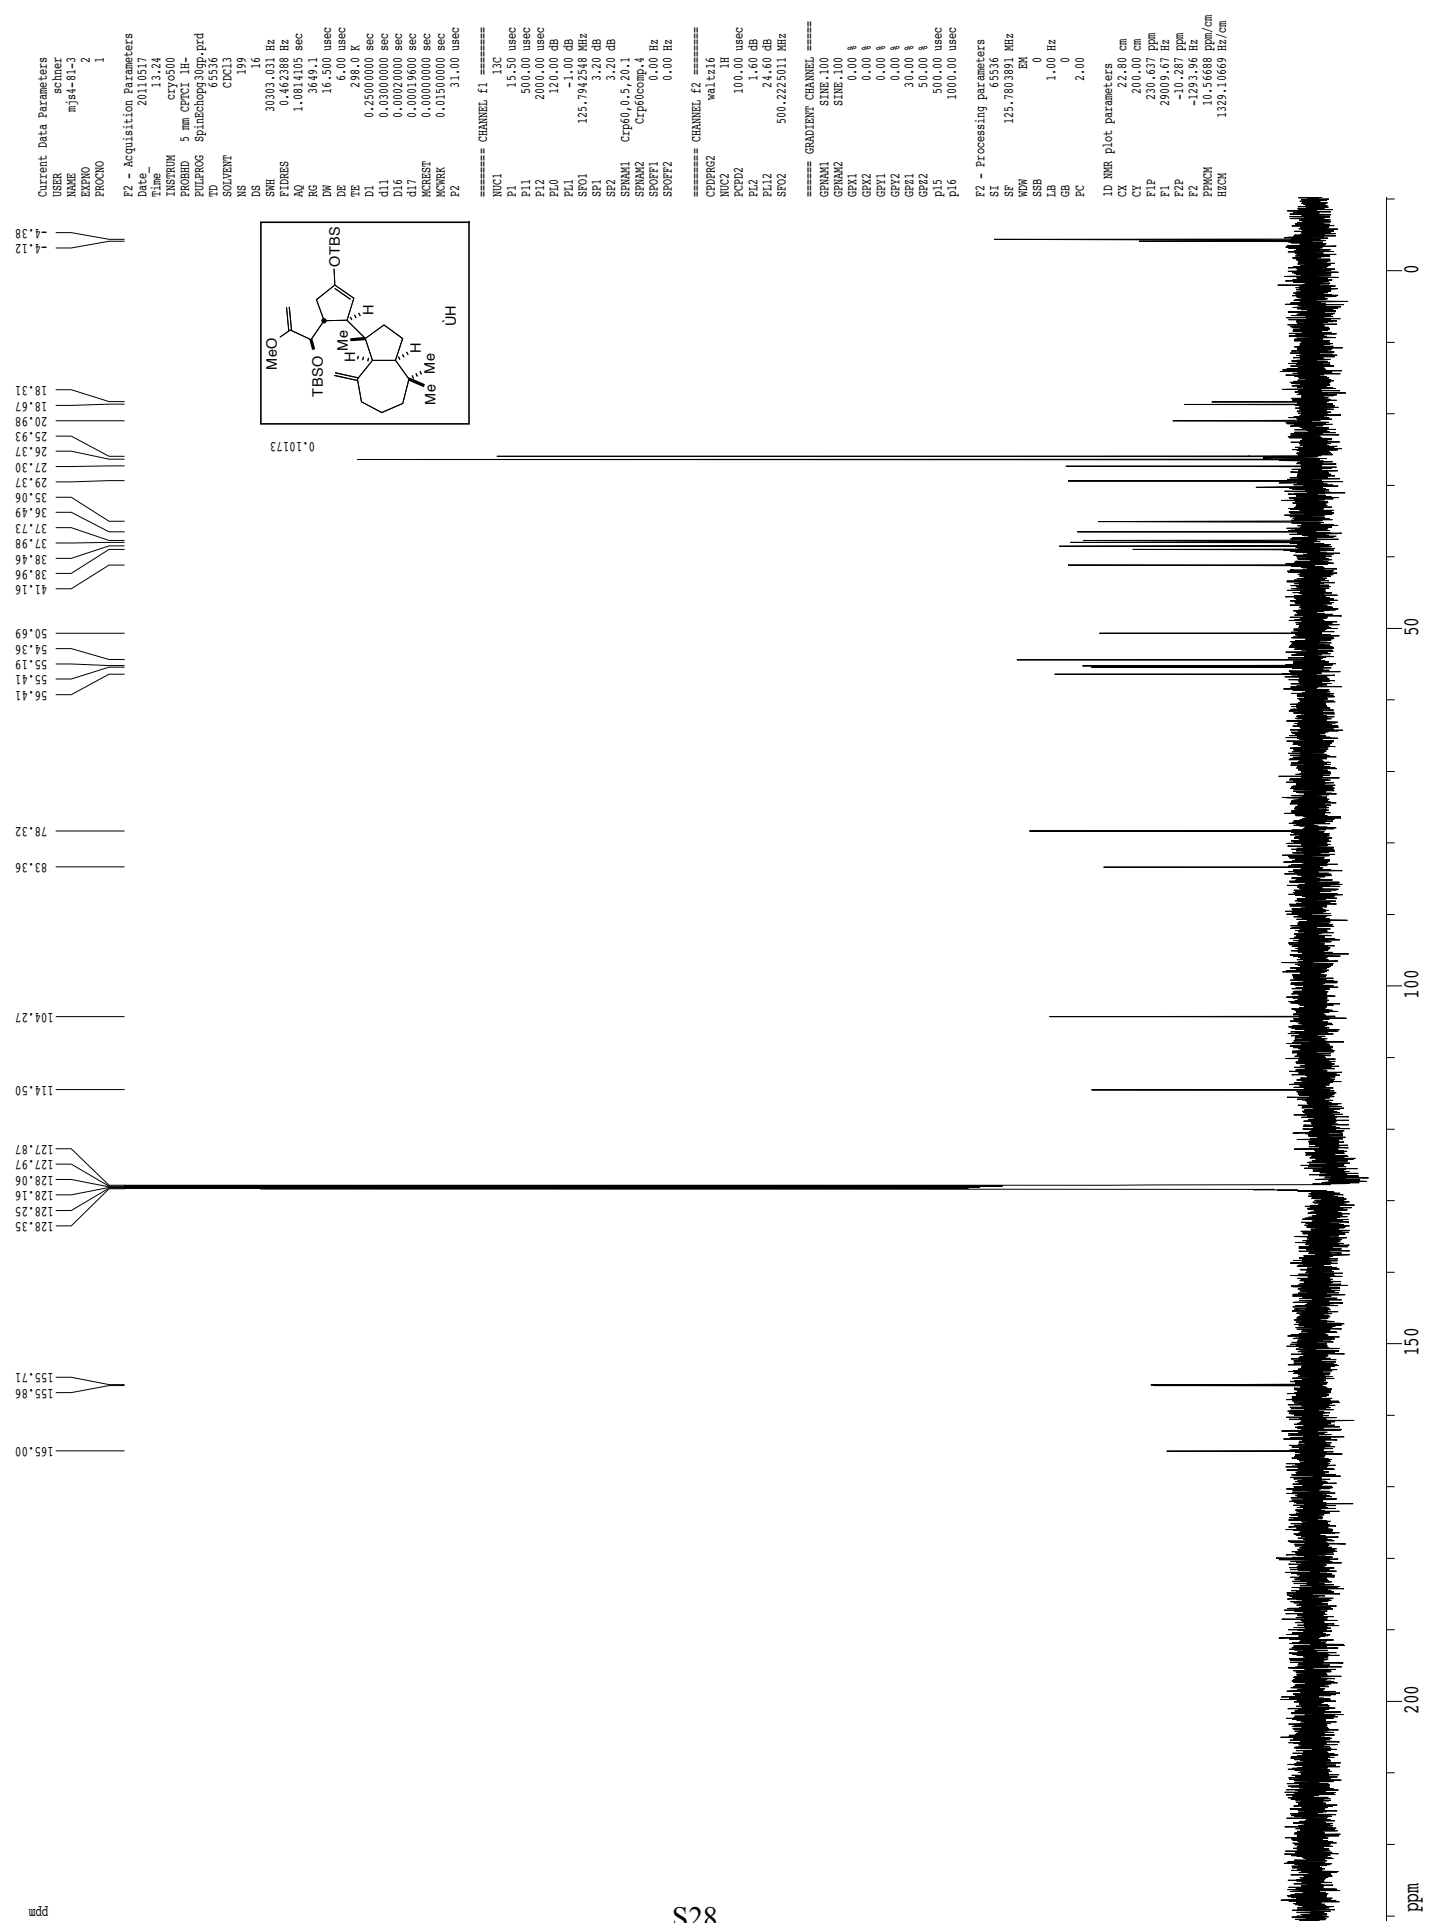

SUPPORTING INFORMATION Overman, L. E.; Schnermann, M. J.

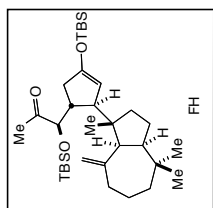

Current Data Parameters  
 USER schner  
 NAME m34--82-3  
 EXPNO 1  
 PROCNO 1

F2 - Acquisition Parameters  
 Date\_ 20110518  
 Time 9:36  
 INSTRUM cryo300  
 PULPROG zgpg30  
 FIDRES 5 mm CPAC1 430  
 TD 81728  
 SOLVENT C6D6  
 NS 8  
 DS 2  
 SWH 8012.820 Hz  
 FIDRES 0.098043 Hz  
 AQ 5.0999398 sec  
 RG 4  
 DW 62.400 usec  
 DE 6.00 usec  
 TE 298.0 K  
 MCFREQ 0.1000000 sec  
 MCHNK 0.01500000 sec

==== CHANNEL f1 =====  
 NUCL 1H  
 P1 7.50 usec  
 PL1 1.60 dB  
 SFO1 500.2235015 MHz

F2 - Processing parameters  
 SI 65536  
 SF 500.2200063 MHz  
 WDW EM  
 SS 0  
 LB 0.30 Hz  
 GB 0  
 PC 4.00

ID NMR plot parameters  
 CX 22.80 cm  
 CY 40.00 cm  
 FIP 7.657 ppm  
 F1 3829.95 Hz  
 F2 -0.648 ppm  
 F2 -324.11 Hz  
 PRCH 0.36423 ppm/cm  
 HZCX 182.19592 Hz/cm

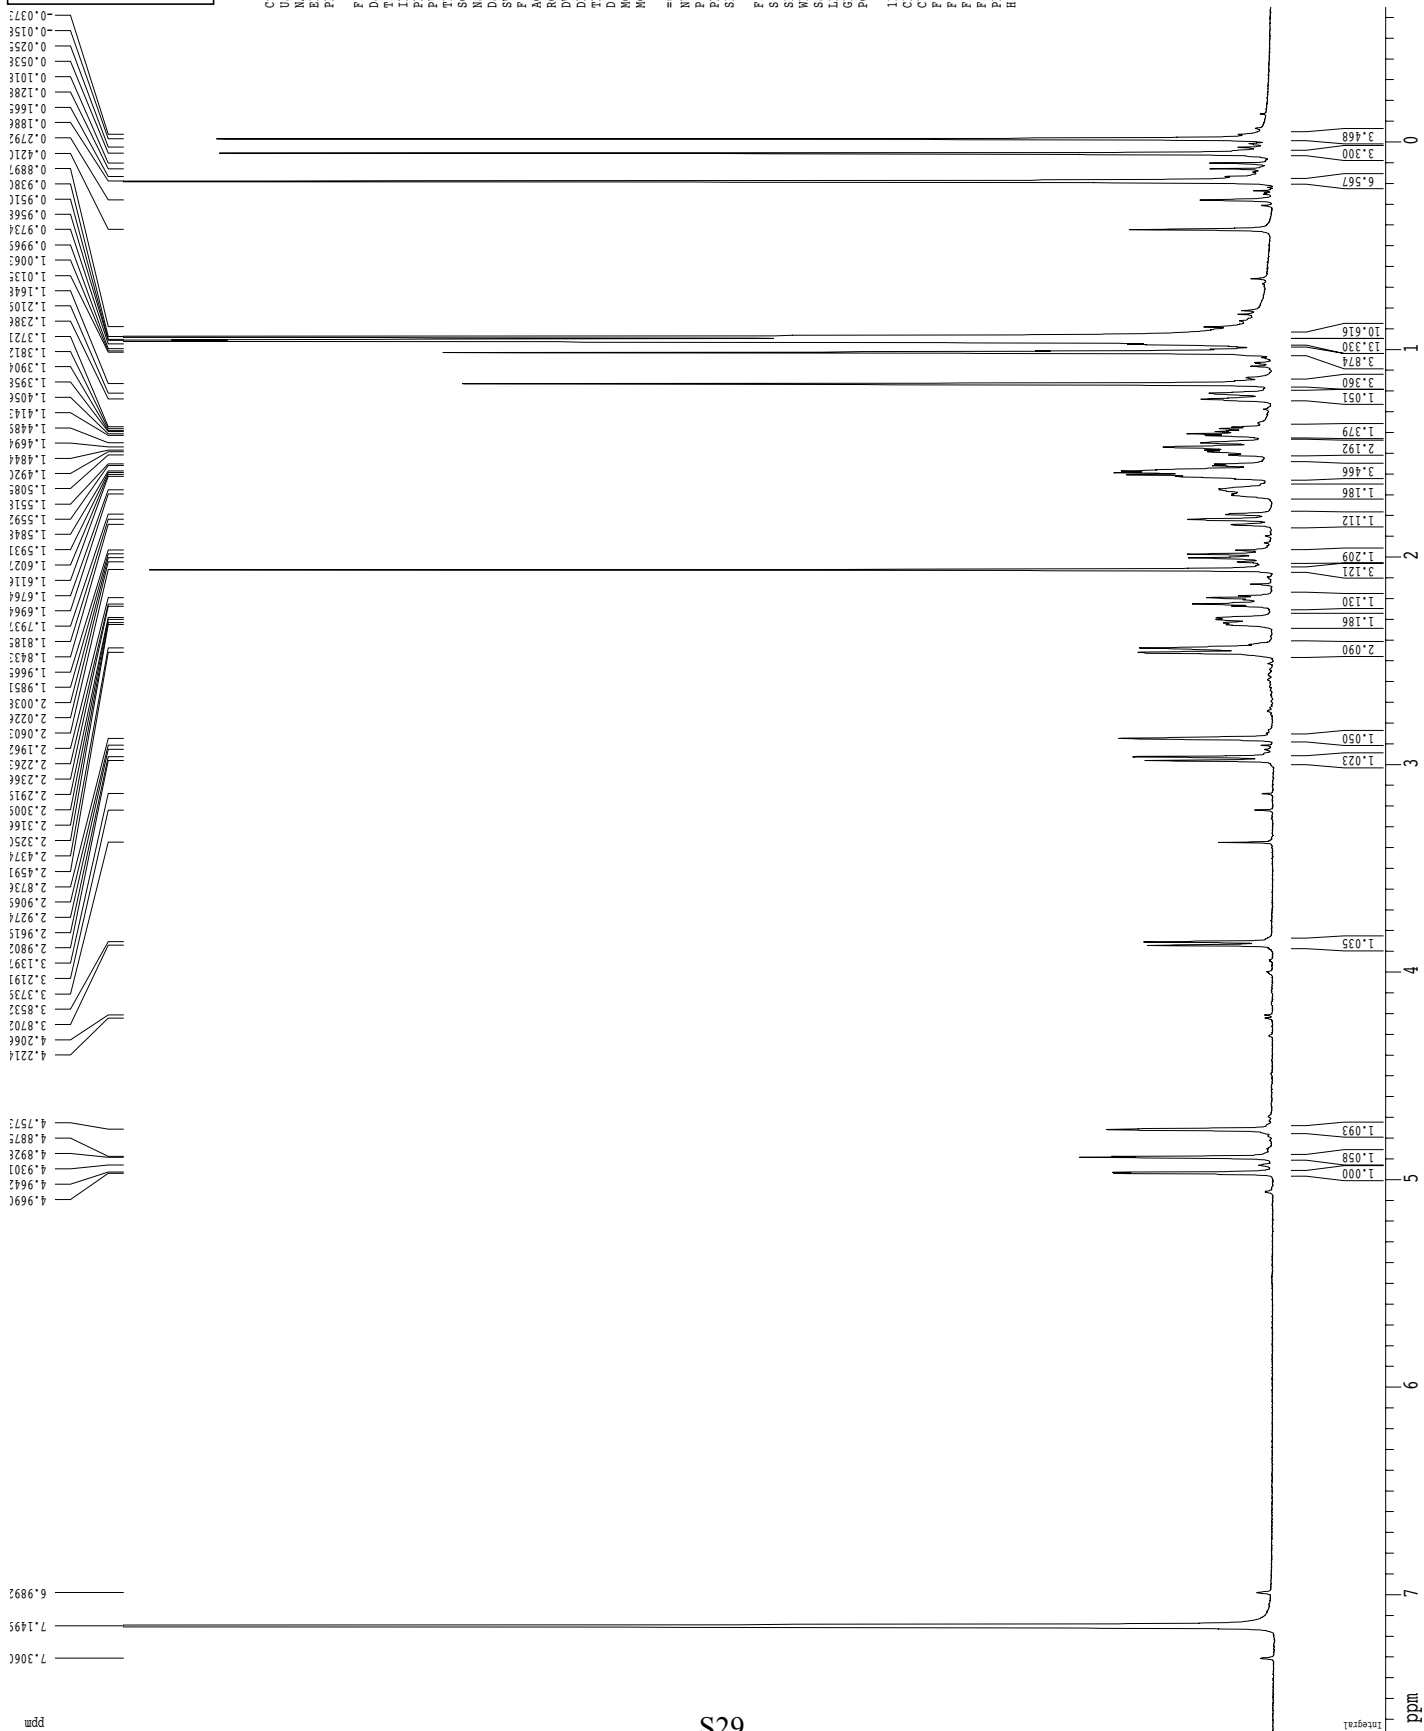

Z-restored spin-echo <sup>13</sup>C spectrum with <sup>1</sup>H decoupling

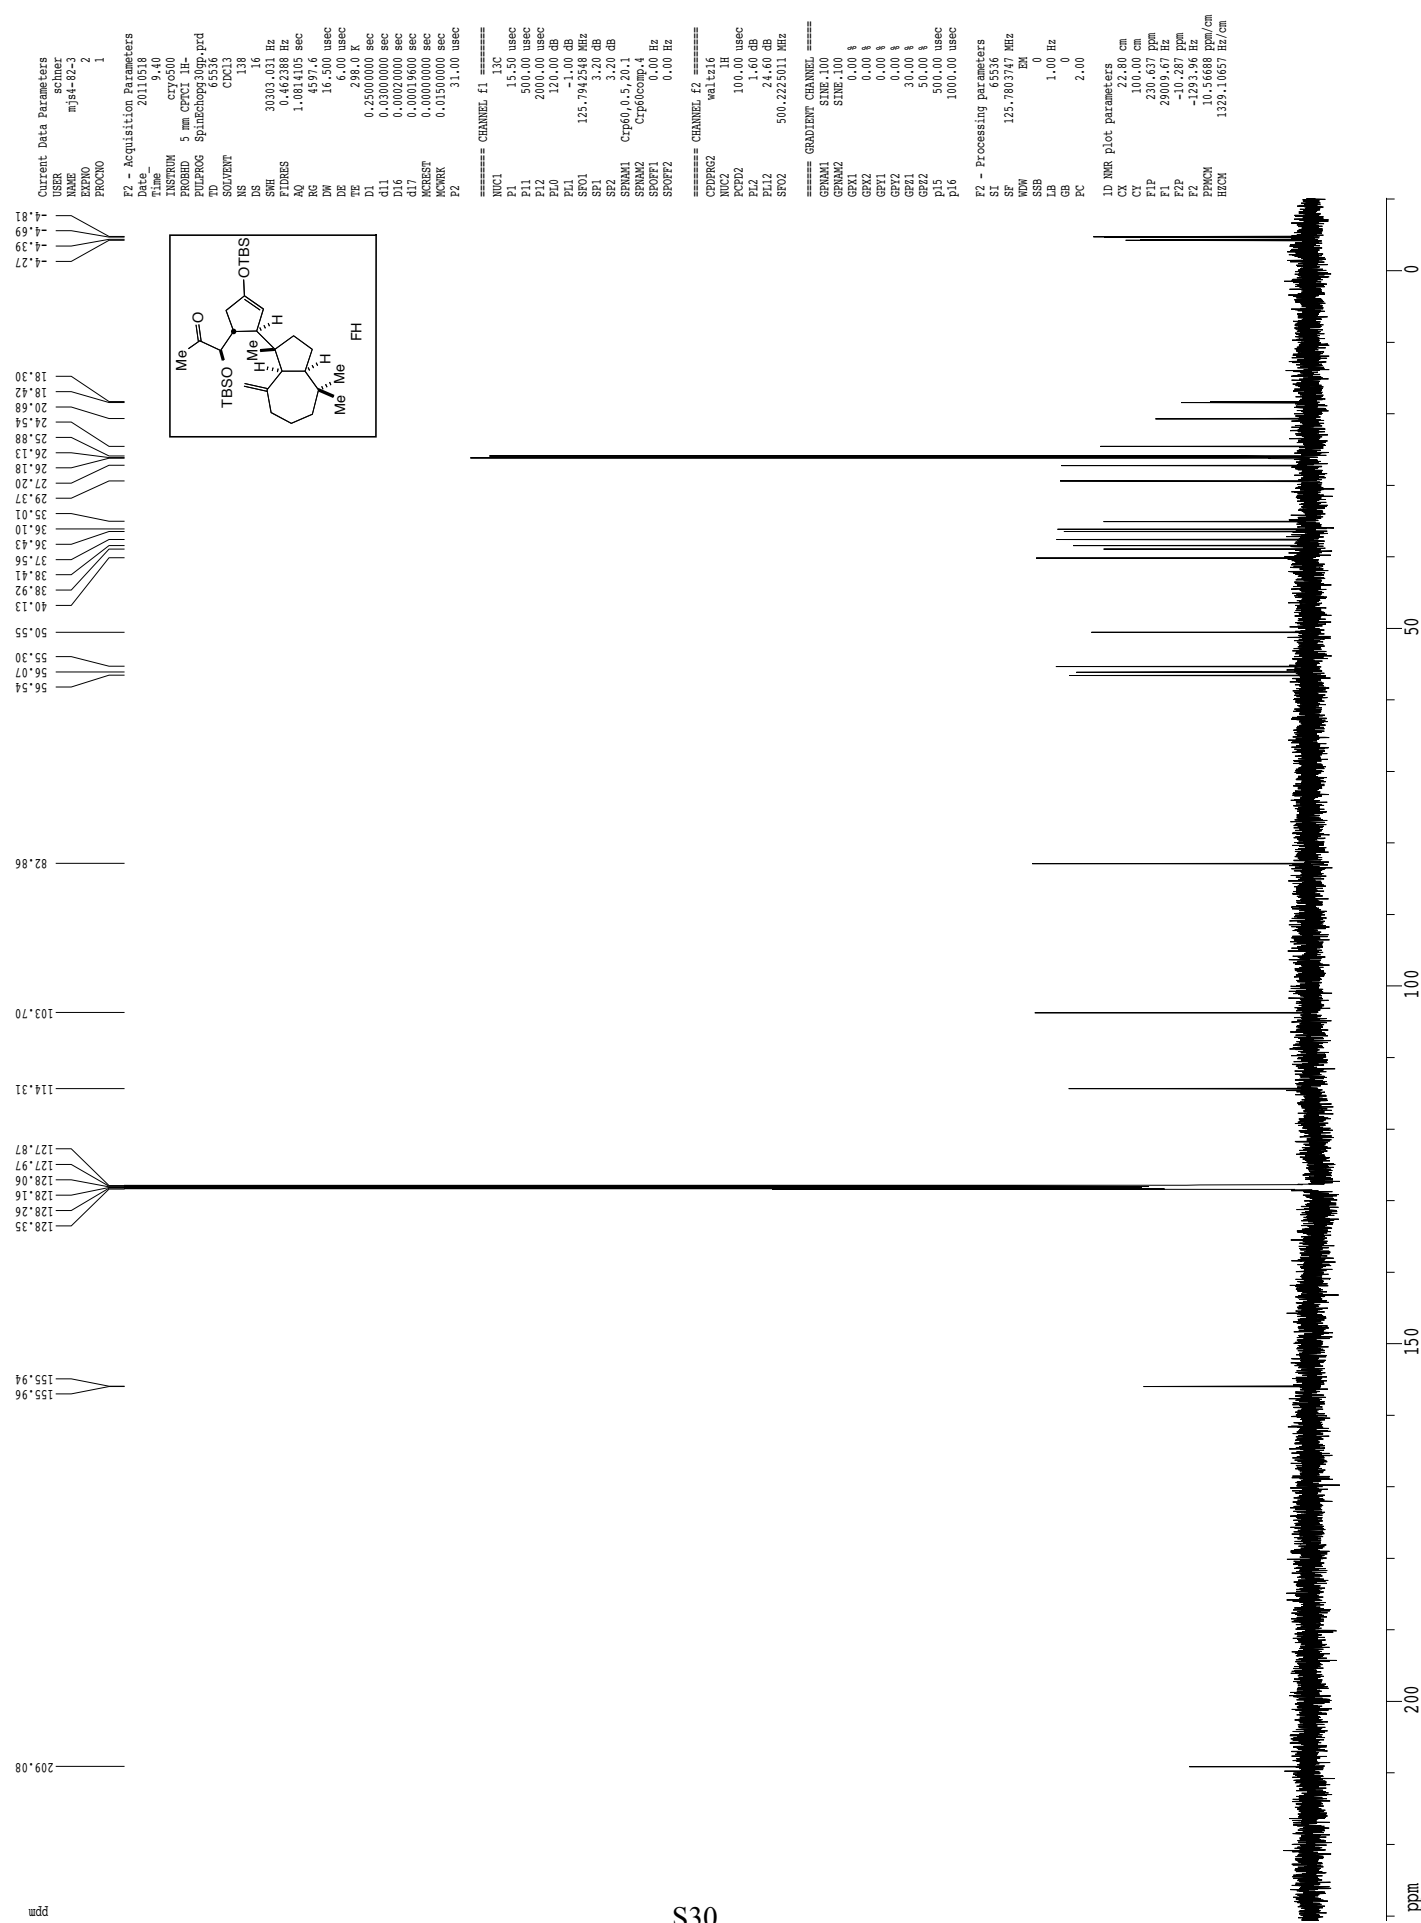

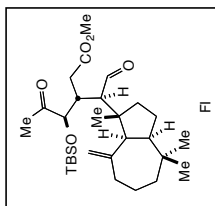

Current Data Parameters  
 USER schner  
 NAME m1st-8s-3real  
 EXPNO 1  
 PROCNO 1

F2 - Acquisition Parameters  
 Date\_ 20110523  
 Time 13.36  
 INSTRUM cryo500  
 PULPROG zgpg30  
 FIDRES 5 mm CPIC1 4230  
 AQ 81728  
 TD 6606  
 SOLVENT 7  
 NS 2  
 DS 2  
 SWH 8012.820 Hz  
 FIDRES 0.098043 Hz  
 AQ 5.0998774 sec  
 RG 4  
 DW 62.400 usec  
 DE 6.00 usec  
 TE 298.0 K  
 MCFBST 0.1000000 sec  
 MCFRST 0.0000000 sec  
 MCFRST 0.0150000 sec

==== CHANNEL f1 =====  
 NU1 1H  
 P1 7.50 usec  
 PL1 1.60 dB  
 SFO1 500.2235015 MHz

F2 - Processing parameters  
 SI 65536  
 SF 500.2200562 MHz  
 EQ  
 F2 0.30 Hz  
 GB 0  
 PC 4.00

1D NMR plot parameters  
 CX 22.80 cm  
 CY 30.00 cm  
 F1P 10.451 ppm  
 F1 5227.69 Hz  
 F2P -0.531 ppm  
 F2 -265.68 Hz  
 PRCH 0.48166 ppm/cm  
 HZCX 240.93716 Hz/cm

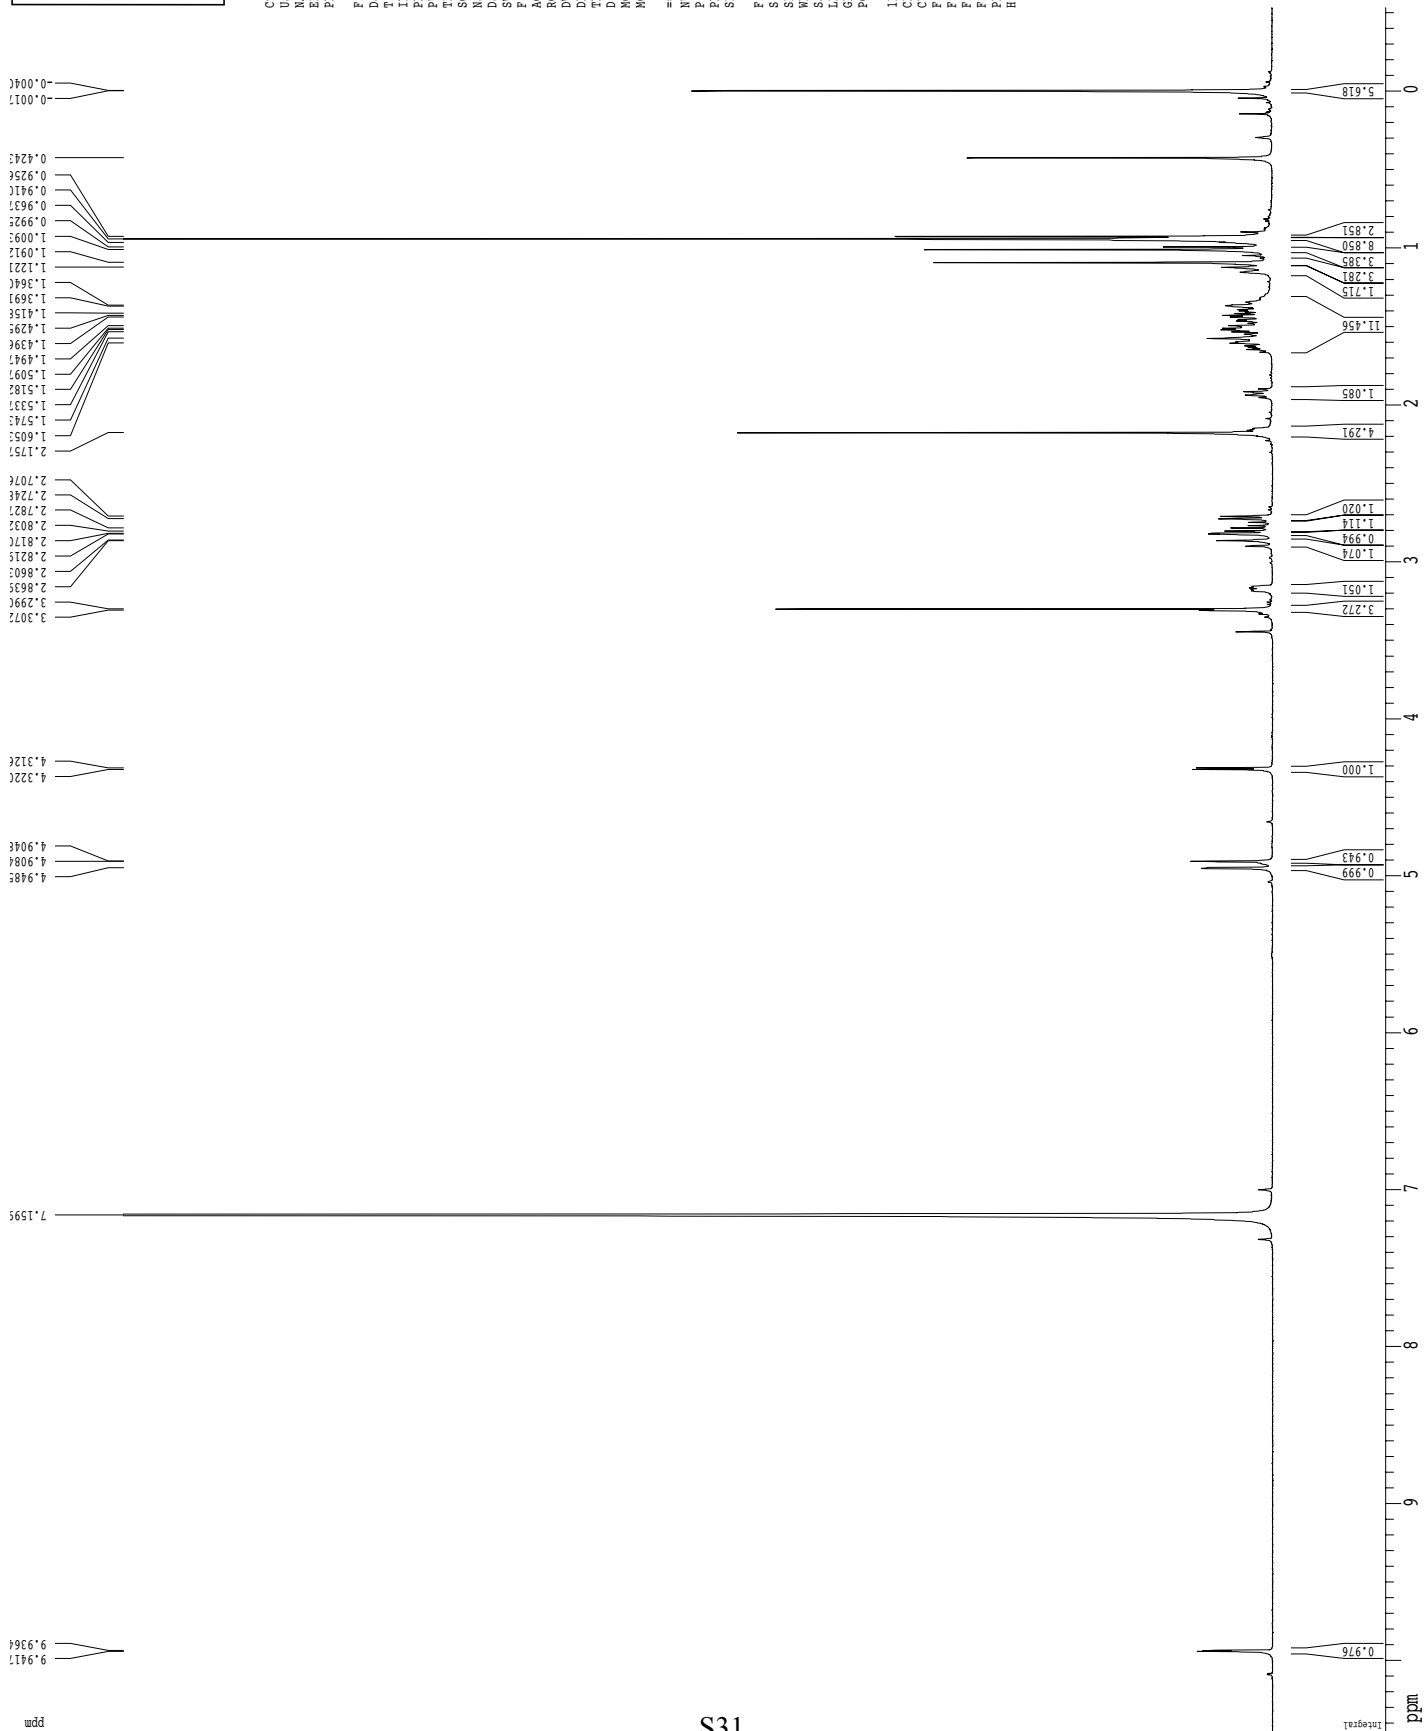

Z-restored spin-echo <sup>13</sup>C spectrum with <sup>1</sup>H decoupling

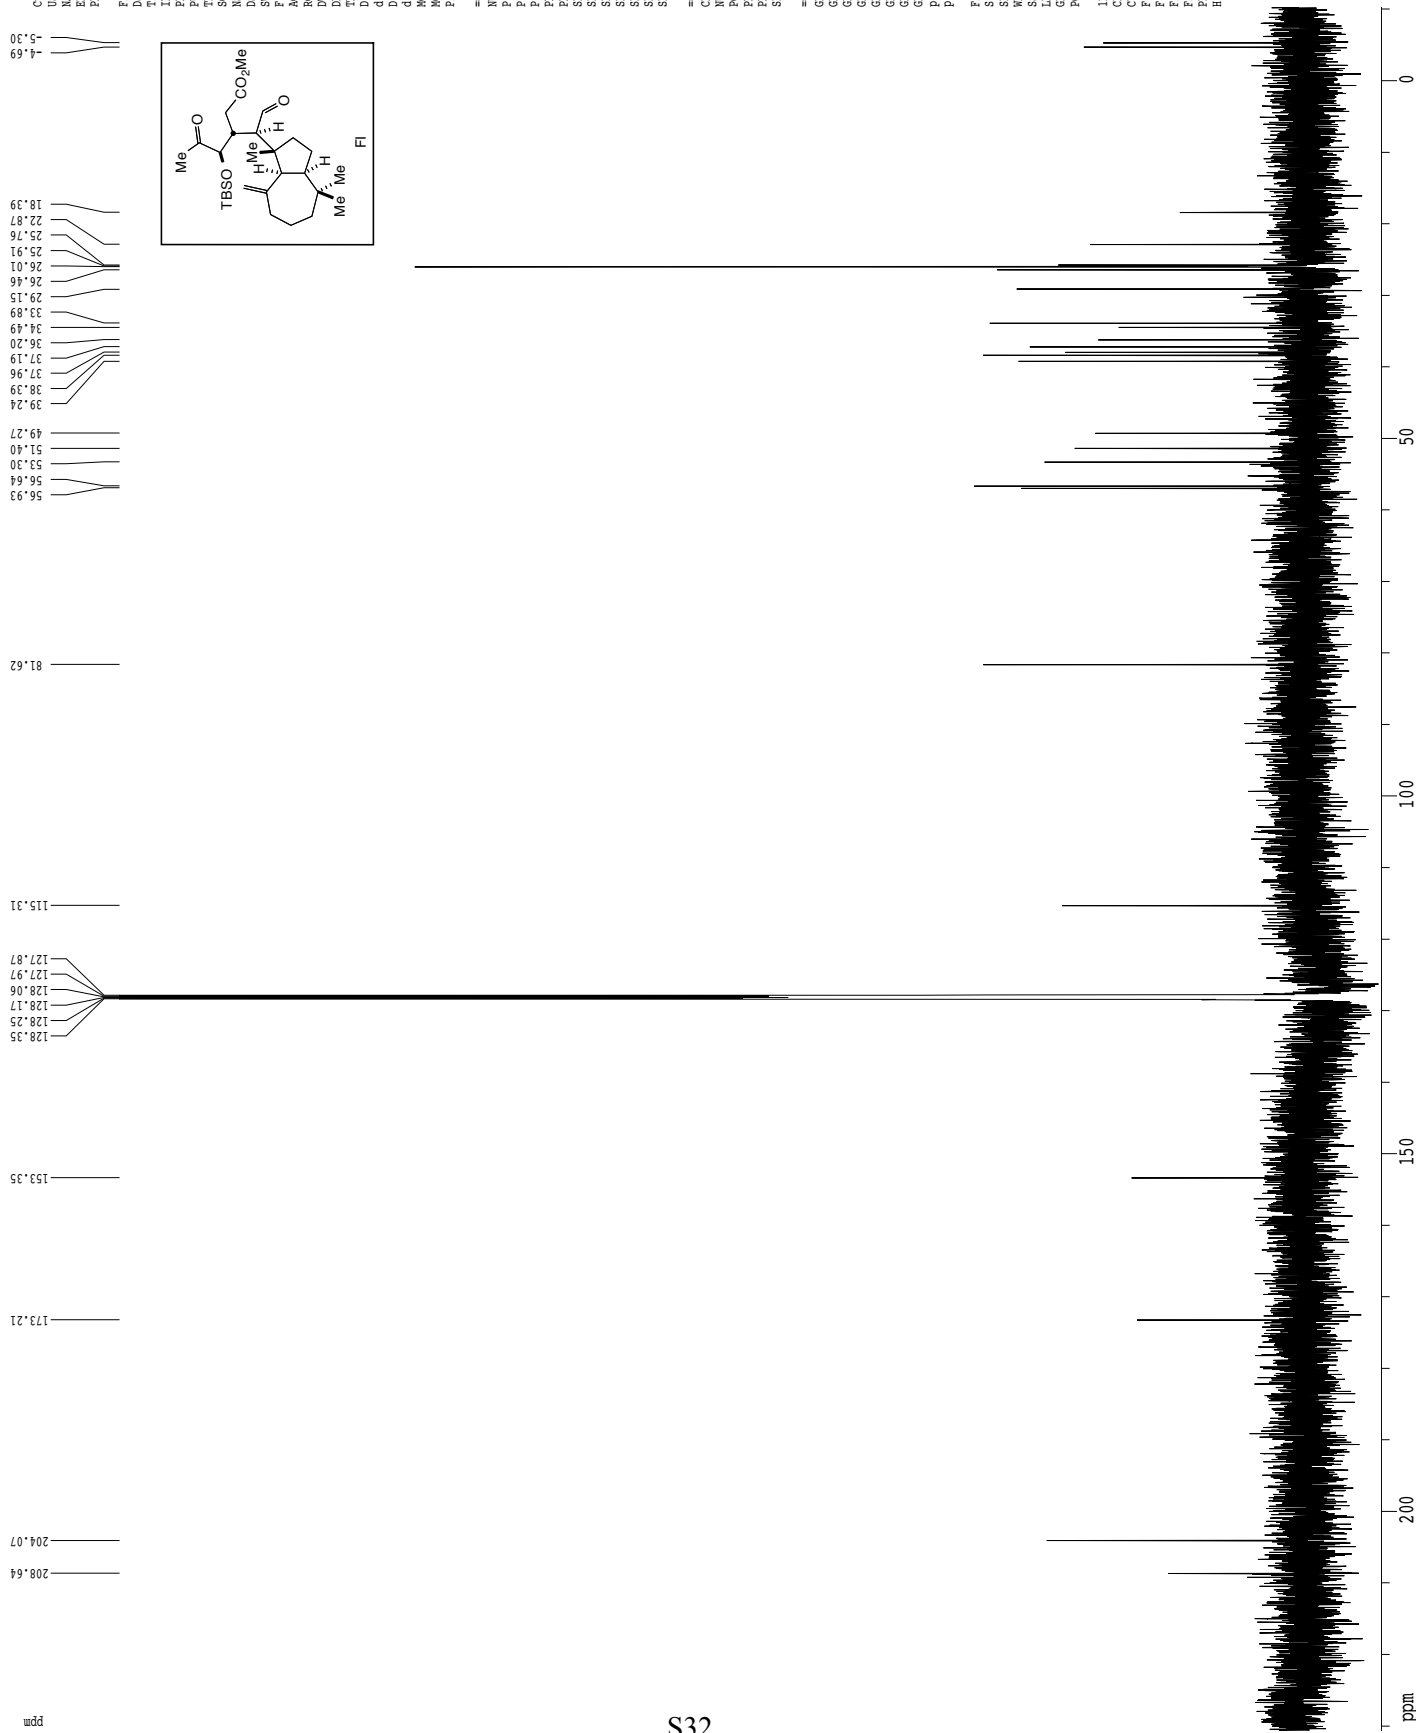





Z-restored spin-echo <sup>13</sup>C spectrum with <sup>1</sup>H decoupling

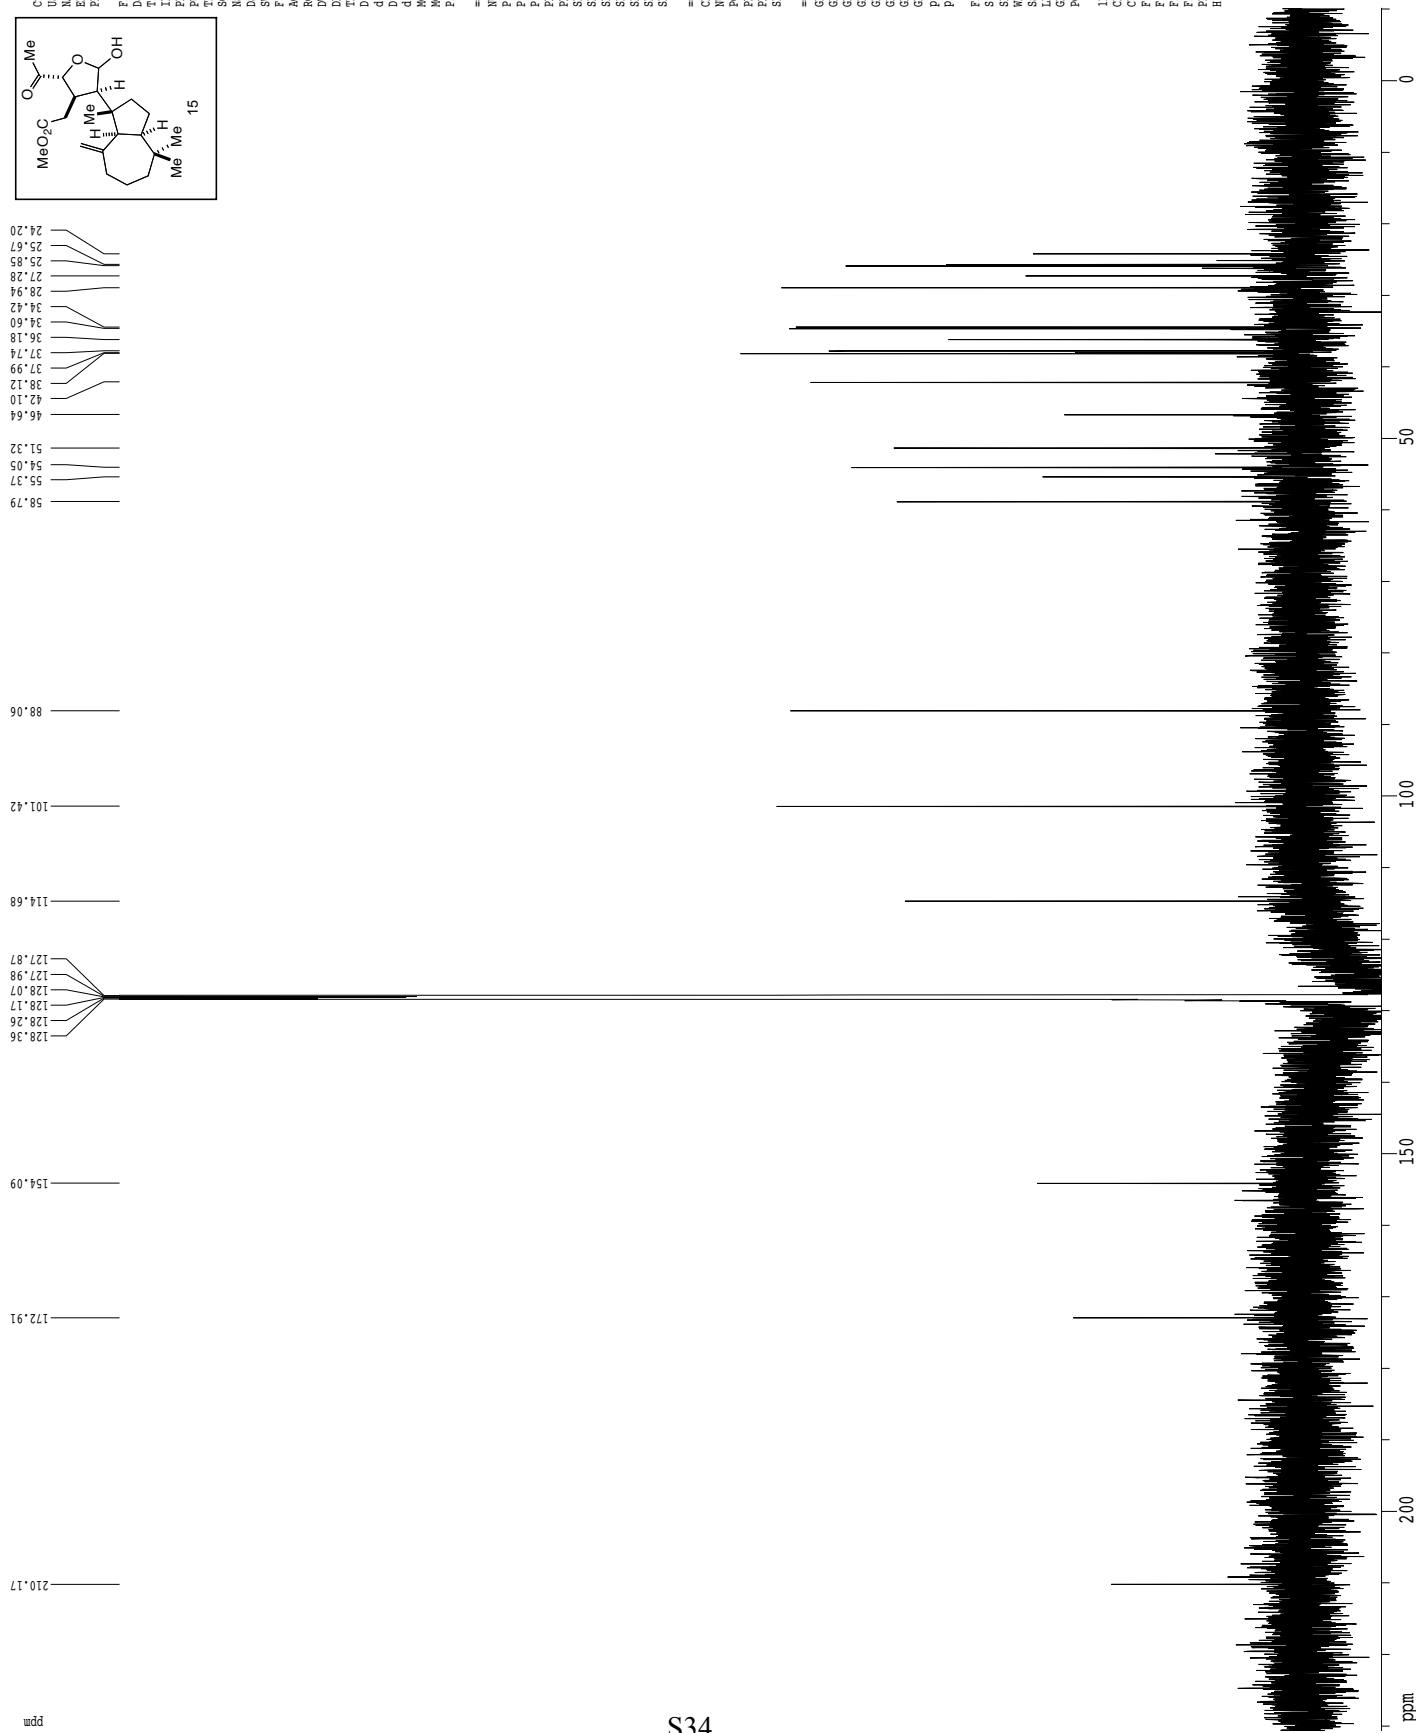

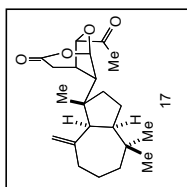

Current Data Parameters  
 USER schner  
 NAME mjs4-95-3c13  
 EXPNO 1  
 PROCNO 1

F2 - Acquisition Parameters  
 Date\_ 20110608  
 Time 7:07  
 NS 20  
 DS 2  
 SWH 8012.820 Hz  
 FIDRES 0.098043 Hz  
 AQ 5.0998774 sec  
 RG 3.6  
 DW 62.400 usec  
 DE 6.00 usec  
 TE 298.0 K  
 MCRST 0.1000000 sec  
 MCRNK 0.01500000 sec

==== CHANNEL f1 =====  
 NU1 1H  
 P1 7.50 usec  
 PL1 1.60 dB  
 SFO1 500.2235015 MHz

F2 - Processing parameters  
 SI 65536  
 SF 500.2200000 MHz  
 WDW EM  
 SS 0.30 Hz  
 GB 0  
 PC 4.00

1D NMR plot parameters  
 CX 22.80 cm  
 CY 100.00 cm  
 F1P 7.630 ppm  
 F1 3816.47 Hz  
 F2P -0.500 ppm  
 F2 -230.11 Hz  
 PRCH 0.35656 ppm/cm  
 HZCX 170.35656 Hz/cm

0.51756  
 0.82074  
 0.94443  
 1.03343  
 1.06194  
 1.18704  
 1.22522  
 1.23851  
 1.24974  
 1.25856  
 1.27100  
 1.28291  
 1.40938  
 1.43628  
 1.44811  
 1.46138  
 1.47571  
 1.48328  
 1.49092  
 1.50121  
 1.62445  
 1.64682  
 1.65151  
 1.67065  
 1.67921  
 1.68517  
 1.79882  
 1.88666  
 2.19038  
 2.22844  
 2.60498  
 2.62371  
 2.64625  
 2.68421  
 2.69418  
 2.72204  
 2.73104

3.61591

4.50821  
 4.51200  
 4.77301  
 4.76996

5.59422  
 5.59065

7.11196  
 7.27235  
 7.42822

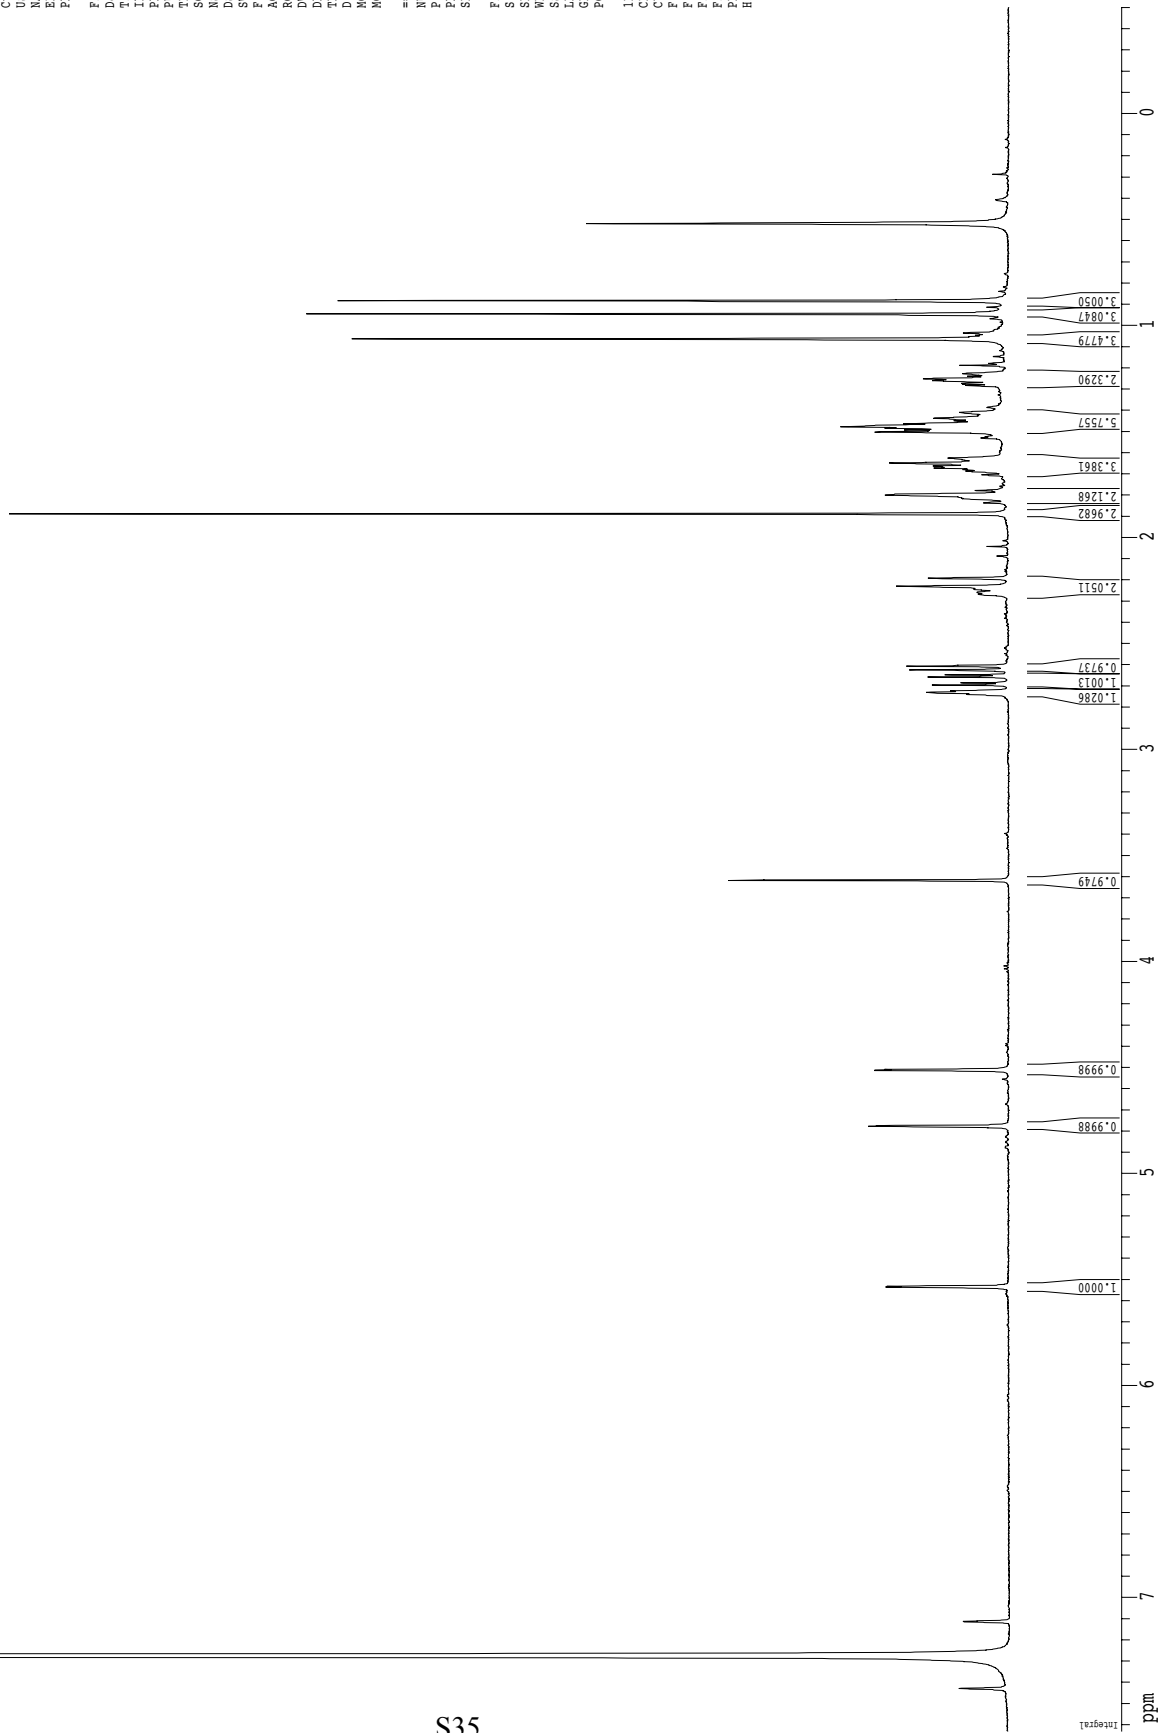

Z-restored spin-echo <sup>13</sup>C spectrum with <sup>1</sup>H decoupling

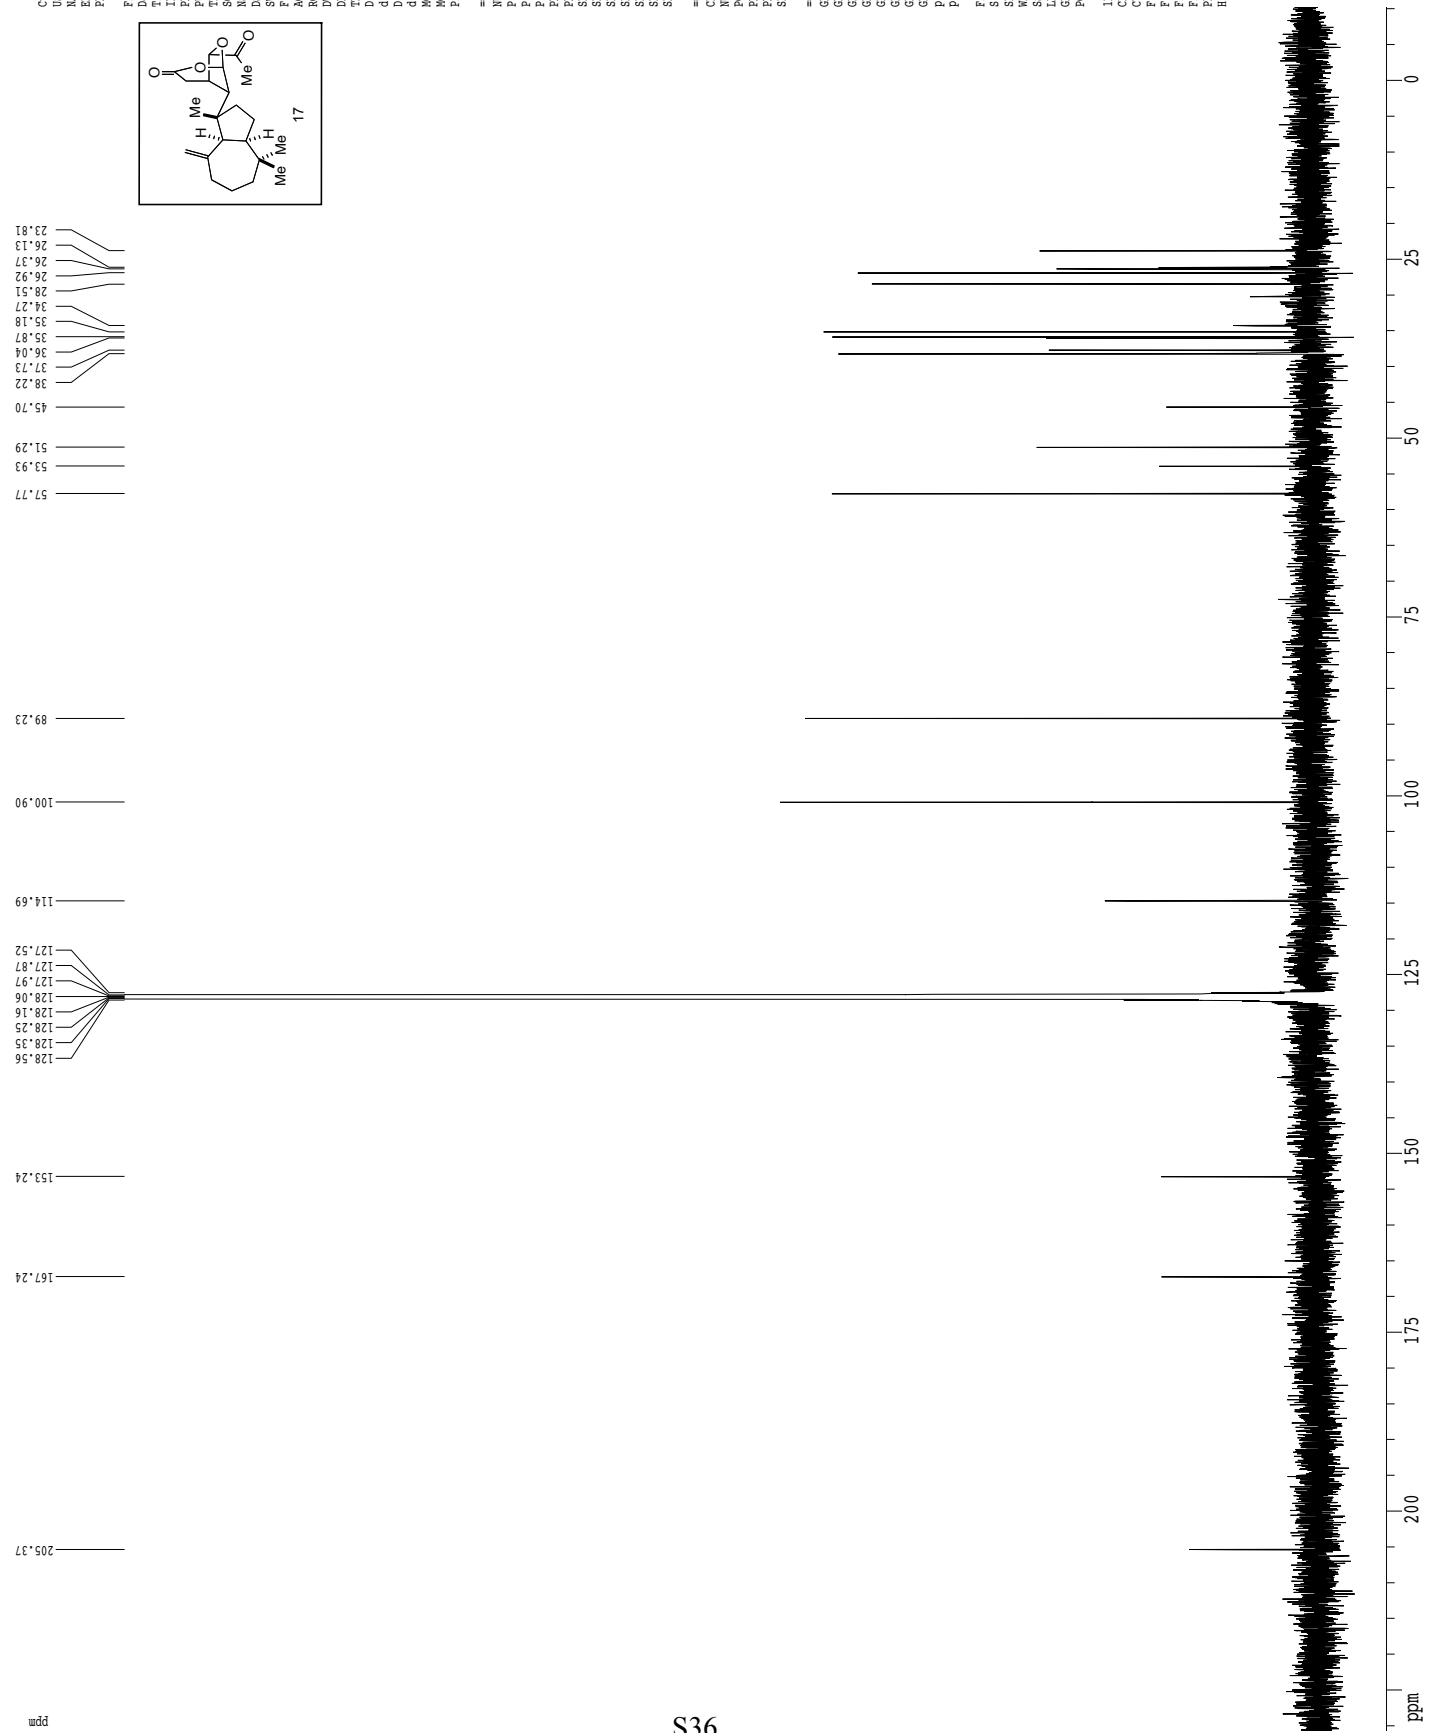

```

Current Data Parameters
USER          SCHNEC
EXPNO         mjs4-95-3C12
PROCNO        1
PROCNO        1

F2 - Acquisition Parameters
Date_         20110608
Time          7.10
INSTRUM      cryo500
PROBHD       5 mm CPAC1 1H
PULPROG      zgpg30
SOLVENT      Spinocholesterol
SOLVENT      CDCl3
NS           4583
DS           16
SWH          30303.031 Hz
FIDRES      0.462388 Hz
AQ          1.0815940 sec
RG          2048
DR          6.00 usec
TE          298.2 K
D1          0.25000000 sec
d11         0.03000000 sec
D16         0.00020000 sec
d17         0.00015600 sec
sFRESF      0.00000000 sec
sF2WRK      0.01500000 sec
F2          31.00 usec

===== CHANNEL f1 =====
NUC1         13C
P1          15.50 usec
PL1         500.00 usec
P12         2000.00 usec
PL2         120.00 dB
SFO1        125.764568 MHz
SF2         500.136360 MHz
SFO2        125.764568 MHz
SP1         3.20 dB
SP2         3.20 dB
SPNAM1      Cpp60.0.5.20.1
SPNAM2      Cpp60comp.4
SFOFF1      0.00 Hz
SFOFF2      0.00 Hz

===== CHANNEL f2 =====
CPDPRG2     wd1cp15
NUC2         1H
PCPD2       100.00 usec
PL2         1.60 dB
PL12        24.60 dB
SFO2        500.2225011 MHz

===== GRADIENT CHANNEL =====
GSPR1       0.00 %
GSPR2       0.00 %
GSPR3       0.00 %
GSPR4       0.00 %
GSPR5       0.00 %
GSPR6       50.00 %
GSPR7       50.00 usec
P16         1000.00 usec

F2 - Processing parameters
SI          65536
SF          125.7803891 MHz
WDW         EM
SSB         0
LB          1.00 Hz
GB          0
PC          2.00

ID NMR plot parameters
CX          22.80 cm
CY          100.00 cm
FIP         230.698 ppm
F1          29017.28 Hz
F2P         -10.222 ppm
F2          -12817.5 Hz
F3          10.688 ppm/cm
HECOK       1329.0004 Hz/cm
    
```

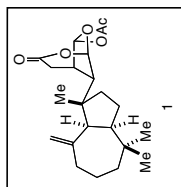

Current Data Parameters  
 USER schner  
 NAME mjs4-101-36g  
 EXPNO 3  
 PROCNO 1

F2 - Acquisition Parameters  
 Date\_ 20110822  
 Time 10.13  
 INSTRUM crys300  
 PULPROG zgpg30  
 FIDRES 5 mm CPFG30  
 AQ 81728  
 TD 6466  
 SOLVENT 50  
 NS 2  
 DS 8012.820 Hz  
 SWH 0.098043 Hz  
 FIDRES 5.0998774 sec  
 RG 4  
 DW 62.400 usec  
 DE 6.00 usec  
 TE 13.0 K  
 MCRBST 0.1000000 sec  
 MCRBK 0.0150000 sec  
 ===== CHANNEL f1 =====  
 NUCL 1H  
 P1 7.50 usec  
 PL1 1.60 dB  
 SFO1 500.2235015 MHz

F2 - Processing parameters  
 SI 65536  
 SF 500.2200000 MHz  
 WDW EM  
 SS 0.30 Hz  
 GB 0  
 PC 4.00

1D NMR plot parameters  
 CX 22.80 cm  
 CY 200.00 cm  
 F1 9.176 ppm  
 F2 -0.451 ppm  
 F2 -225.81 Hz  
 PRCH 0.42224 ppm/cm  
 HZCX 211.21341 Hz/cm

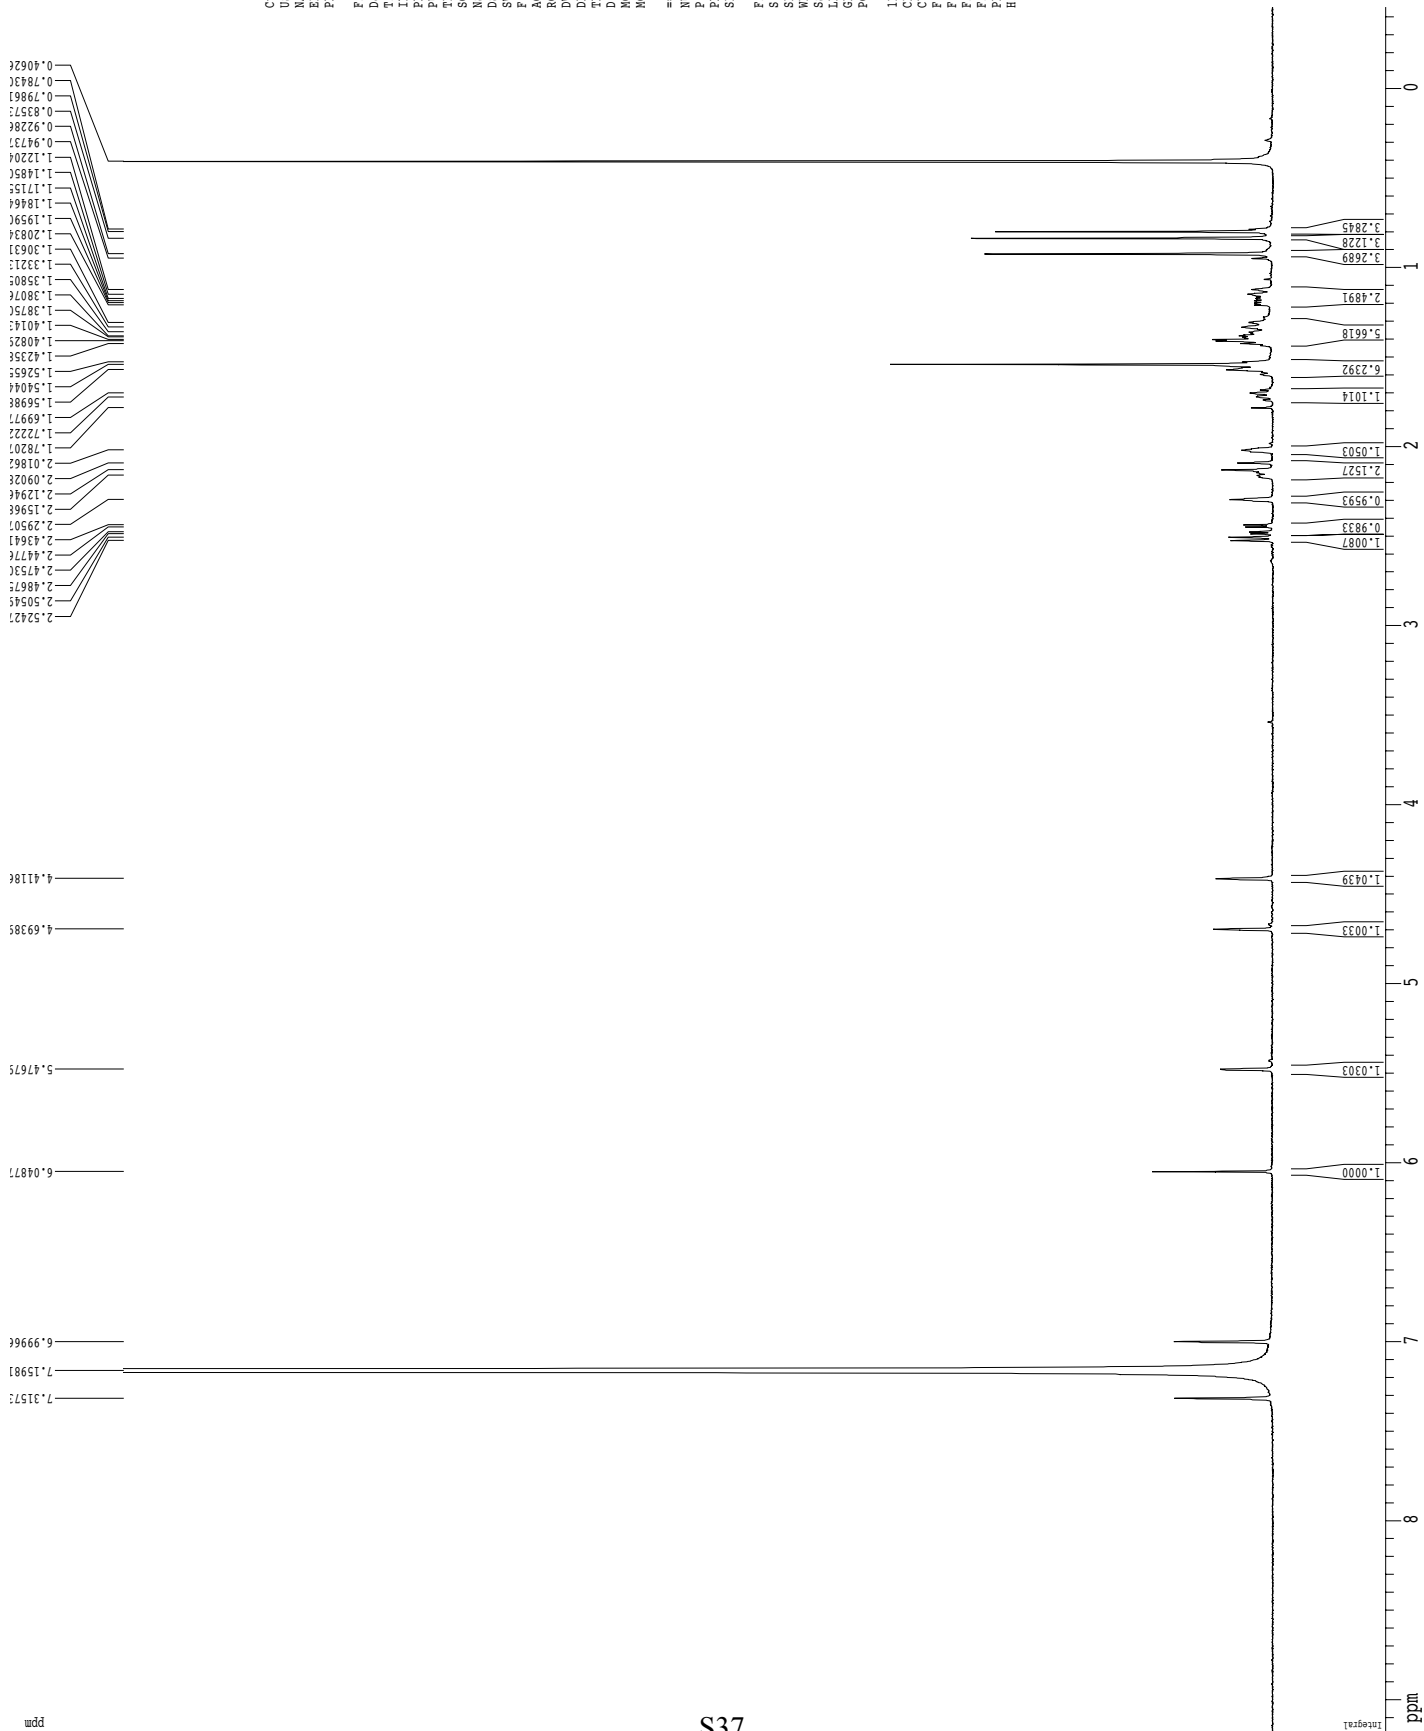

Z-restored spin-echo <sup>13</sup>C spectrum with <sup>1</sup>H decoupling

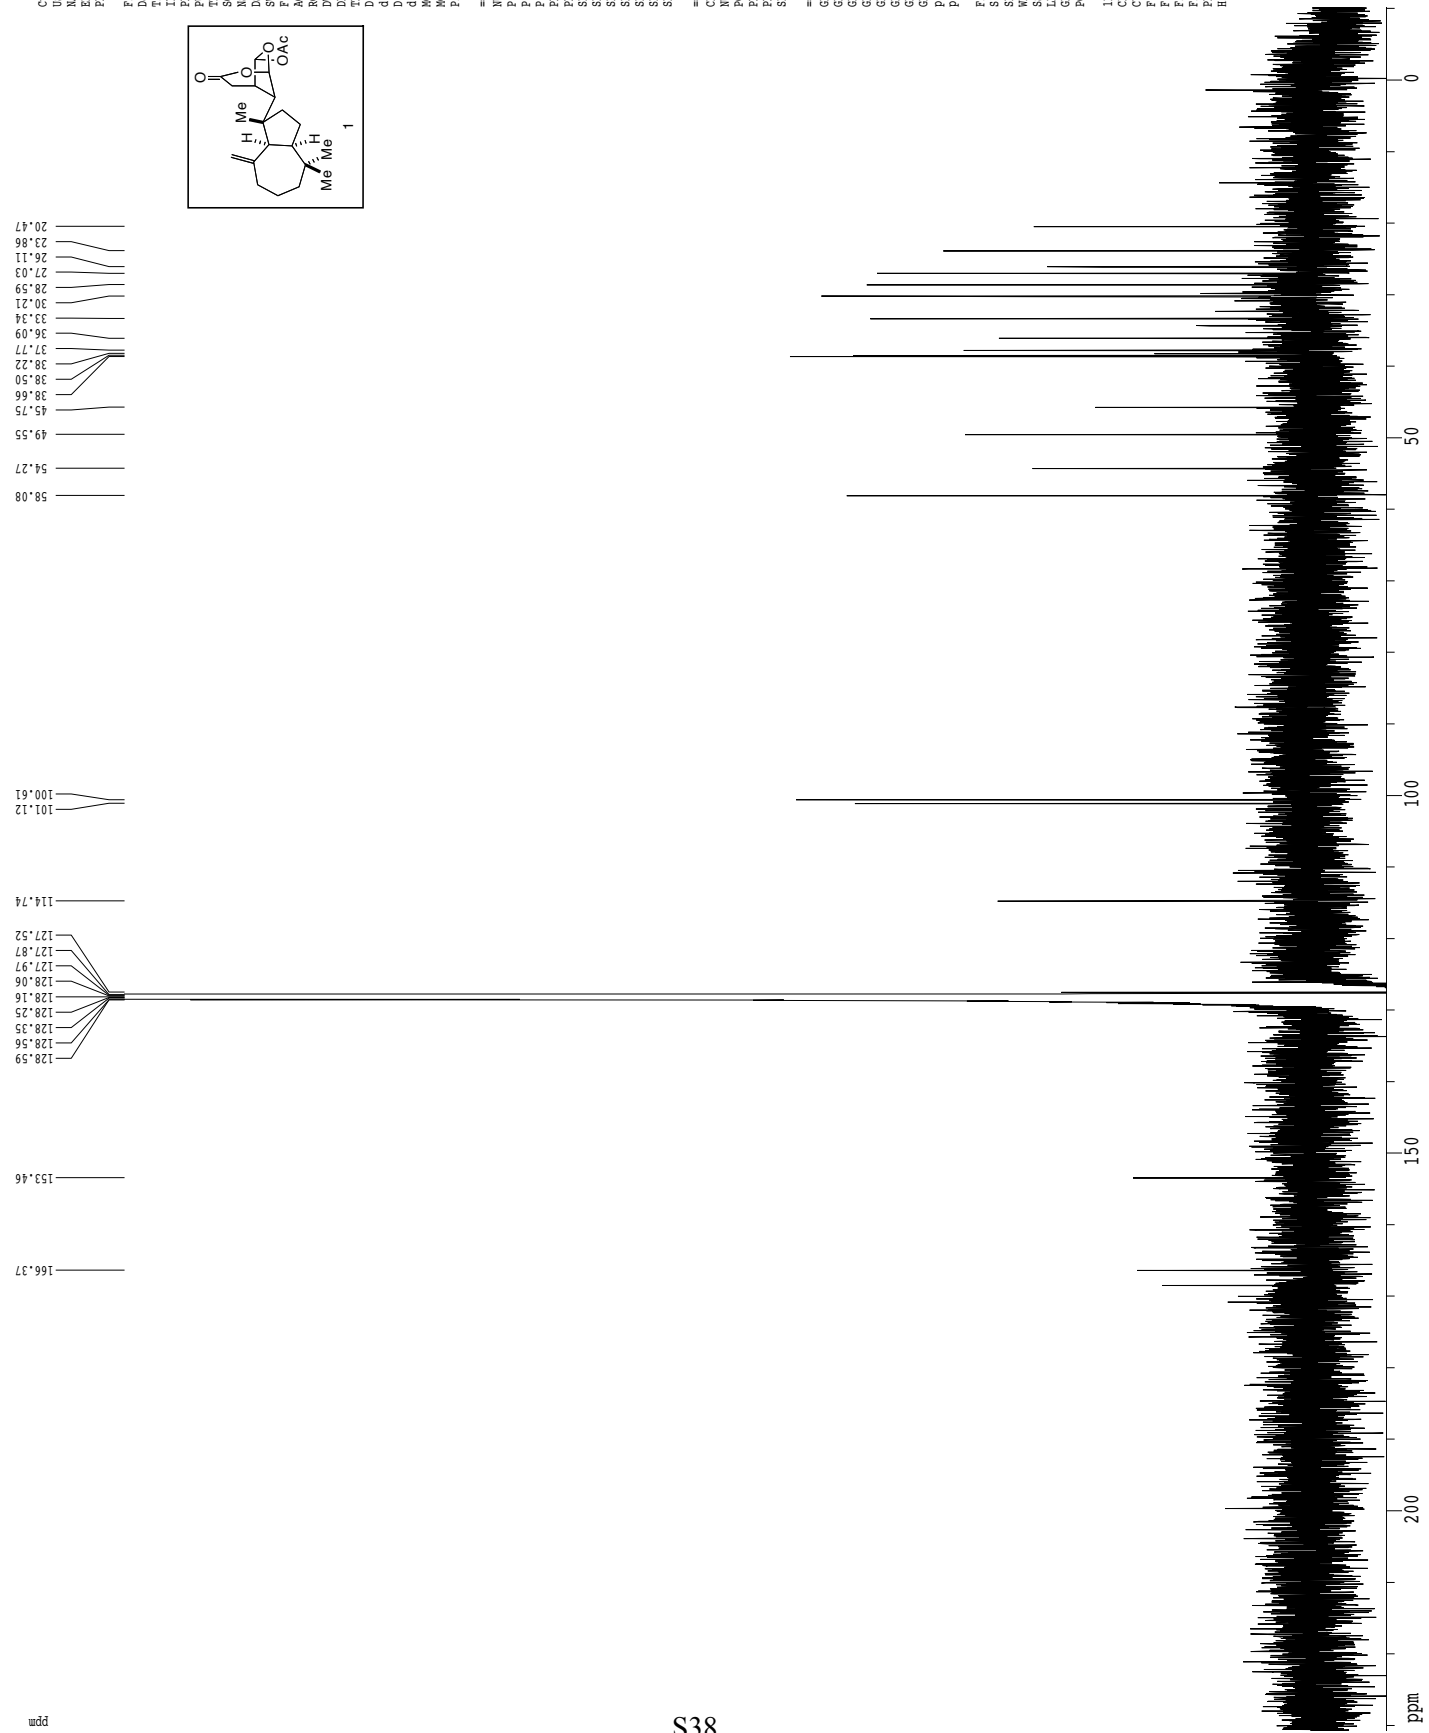

Figure S1. Comparison H1 NMR of synthetic and natural aplyviolene (1)

synthetic  
(C6D6, 600 Mhz)

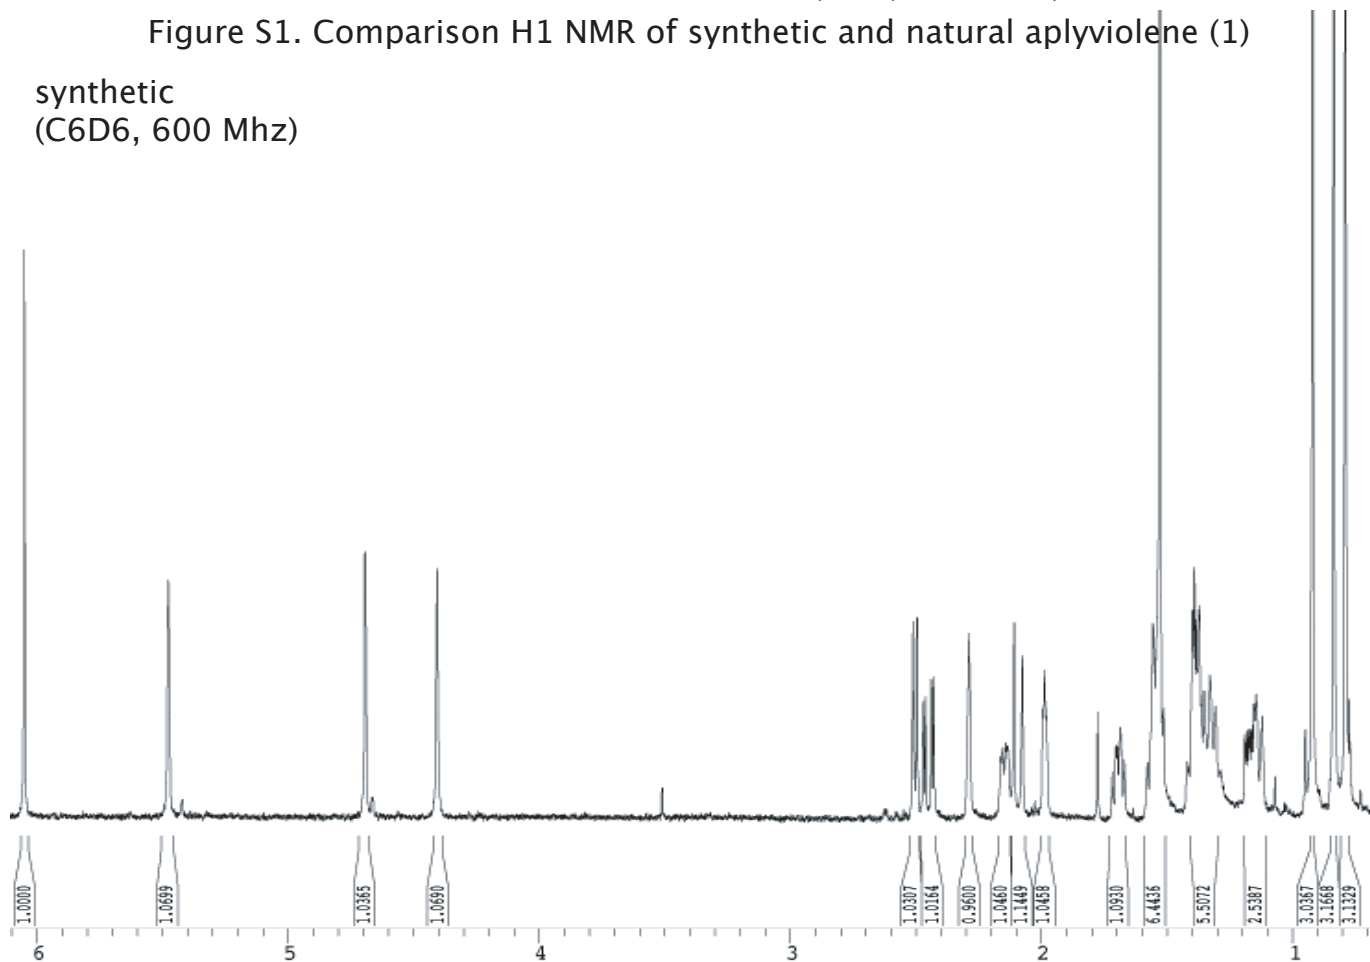

natural  
(C6D6, 600 Mhz)

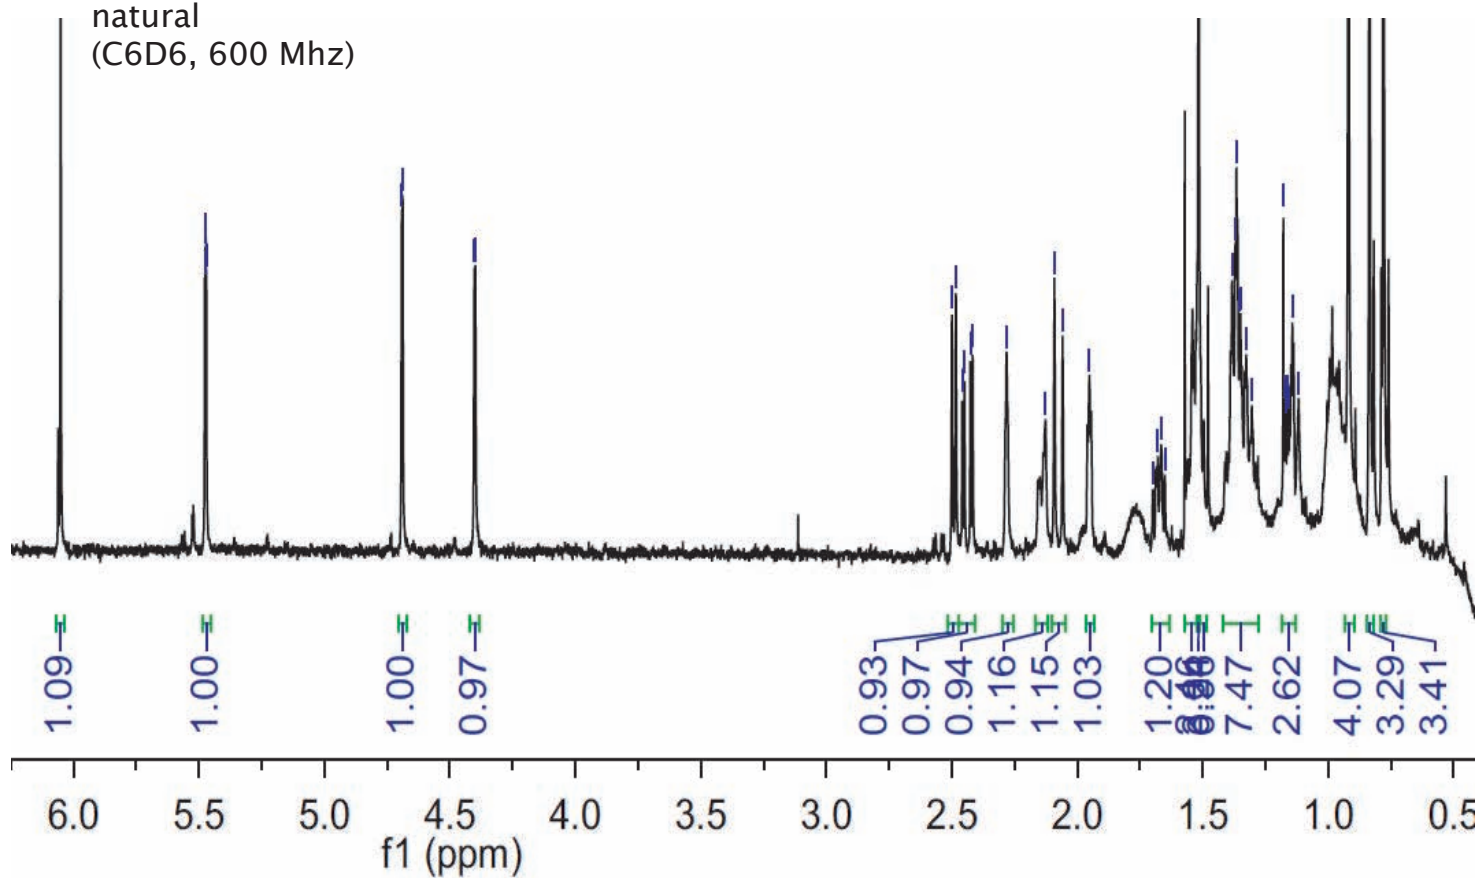

Supplement: NIHMS328259-supplement-1_si_001.pdf [file NIHMS328259-supplement-1_si_001.pdf]
